# Supplementary material for: MnO2-promoted carboesterification of alkenes with anhydrides: a facile approach to γ-lactones
Source: Royal Society of Chemistry journal article supplement (doi:10.1039/c5cc08867d), 2016-01-01
Supplement: c5cc08867d1.pdf [file c5cc08867d1.pdf]

# Supporting Information

## MnO<sub>2</sub>-Promoted Carboesterification of Alkenes with Anhydrides: A Facile Approach to $\gamma$ -Lactones

Lihuan Wu,<sup>+a,b</sup> Zhenming Zhang,<sup>+a</sup> Jianhua Liao,<sup>a</sup> Jianxiao Li,<sup>a</sup> Wanqing Wu,<sup>a</sup>  
Huanfeng Jiang,<sup>\*a</sup>

<sup>a</sup> School of Chemistry and Chemical Engineering, South China University of Technology, Guangzhou 510640, P. R. China

Fax: (+86) 20-8711-2906; E-mail: jianghf@scut.edu.cn

<sup>b</sup> College of Chemistry and Chemical Engineering, Zhaoqing University, Zhaoqing 526061, P. R. China

<sup>+</sup> These authors contributed equally to this work.

## Contents

|                                                                     |           |
|---------------------------------------------------------------------|-----------|
| <b>1. General methods.....</b>                                      | <b>2</b>  |
| <b>2. General procedure for carboesterification of alkynes.....</b> | <b>2</b>  |
| <b>3. Characterization data for all products.....</b>               | <b>2</b>  |
| <b>4. Copies of NMR spectra.....</b>                                | <b>10</b> |

## 1. General methods

All solvents and commercialized reagents were used without further purifications.  $^1\text{H}$ ,  $^{13}\text{C}$  and  $^{19}\text{F}$  NMR data were recorded on a Bruker DRX-400 NMR Spectrometer with  $\text{CDCl}_3$  as the solvent.  $^1\text{H}$  shifts were referenced to  $\text{CDCl}_3$  at 7.26 ppm.  $^{13}\text{C}$  shifts were referenced to  $\text{CDCl}_3$  at 77 ppm. IR spectra were obtained with an infrared spectrometer on either potassium bromide pellets or liquid films between two potassium bromide pellets. GC-MS data were obtained on Thermo using electron ionization. HRMS was carried out on a high-resolution mass spectrometer (LCMS-IT-TOF). TLC was performed using commercially available 100–400 mesh silica gel plates (GF<sub>254</sub>).

## 2. General procedure for hydration of alkynes

To a mixture of alkene (0.5 mmol),  $\text{MnO}_2$  (1.2 equiv.), NaOAc (1.0 equiv.) and LiBr (0.2 equiv.) was added  $\text{Ac}_2\text{O}$  (1.0 mL) in a test tube (10 mL) equipped with a magnetic stirring bar. The mixture was stirred at 120 °C for 3 h. After the reaction was completed, the residue was directly subjected to silica gel column chromatography or purification of the mixture on a preparative TLC to afford the desired product.

## 3. Characterization data for all products

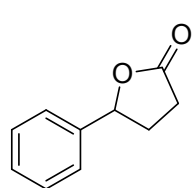

### 5-Phenyldihydrofuran-2(3H)-one (2a)<sup>[1]</sup>

Yield: 92% (74.5 mg); Red thick oil;  $^1\text{H}$  NMR (400 MHz,  $\text{CDCl}_3$ )  $\delta$  7.43-7.34 (m, 5H), 5.52 (t,  $J = 7.0$  Hz, 1H), 2.70-2.64 (m, 3H), 2.27-2.15 (m, 1H);  $^{13}\text{C}$  NMR ( $\text{CDCl}_3$ , 100 MHz)  $\delta$  176.7, 139.4, 128.8, 128.5, 125.3, 81.3, 30.9, 28.9; IR (KBr)  $\nu_{\text{max}}$  ( $\text{cm}^{-1}$ ) 3032, 2930, 2358, 1775, 1174, 1025, 757; MS (EI)  $m/z$  56, 77, 107, 117, 162.

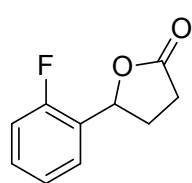

### 5-(2-Fluorophenyl)dihydrofuran-2(3H)-one (2b)<sup>[2]</sup>

Yield: 85% (76.5 mg); Red thick oil;  $^1\text{H}$  NMR (400 MHz,  $\text{CDCl}_3$ )  $\delta$  7.40 (t,  $J = 8.0$  Hz, 1H), 7.33 (d,  $J = 4.0$  Hz, 1H), 7.17 (t,  $J = 4.0$  Hz, 1H), 7.08 (t,  $J = 8.0$  Hz, 1H), 5.74 (t,  $J = 8.4$  Hz, 1H), 2.76-2.70 (m, 1H), 2.68-2.64 (m, 2H), 2.24-2.15 (m, 1H);  $^{13}\text{C}$  NMR (100 MHz,  $\text{CDCl}_3$ )  $\delta$  176.7, 159.2 (d,  $J = 245$  Hz), 130.0 (d,  $J = 8.1$  Hz), 126.9 (d,  $J = 12.3$  Hz), 126.5 (d,  $J = 4.3$  Hz), 124.5 (d,  $J = 4.1$  Hz), 115.6 (d,  $J = 21.6$  Hz), 76.3, 29.7, 28.5; IR (KBr)  $\nu_{\text{max}}$  ( $\text{cm}^{-1}$ ) 3537, 3067, 2940, 2358, 2356, 1781, 1492, 1184, 1033, 761; MS (EI)  $m/z$  56, 95, 123, 135, 180.

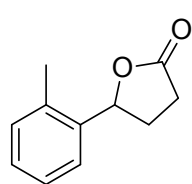

### 5-(*o*-Tolyl)dihydrofuran-2(3H)-one (2c)<sup>[1]</sup>

Yield: 86% (75.7 mg); White solid, M.p. 60-60.5°C;  $^1\text{H}$  NMR (400 MHz,  $\text{CDCl}_3$ )  $\delta$  7.35 (d,  $J = 4.4$  Hz, 1H), 7.24-7.13 (m, 2H), 7.19 (m, 1H), 5.71 (t,  $J = 6.4$  Hz, 1H), 2.69-2.64 (m, 3H), 2.34 (s, 3H), 2.16-2.10 (m, 1H);  $^{13}\text{C}$  NMR (101 MHz,  $\text{CDCl}_3$ )  $\delta$  177.1, 137.6, 134.2, 130.7, 128.2, 126.5, 124.2, 78.9, 29.6, 28.7, 19.0; IR (KBr)  $\nu_{\text{max}}$  ( $\text{cm}^{-1}$ ) 3529, 2928, 2360, 1775, 1459, 1177, 1022, 754; MS (EI)  $m/z$  65, 91, 121, 131, 161, 176.

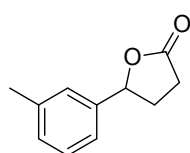**5-(*m*-Tolyl)dihydrofuran-2(3*H*)-one (2d)** <sup>[3]</sup>

Yield: 89% (78.3 mg); Orange thick oil; <sup>1</sup>H NMR (400 MHz, CDCl<sub>3</sub>) δ 7.32-7.29 (m, 1H), 7.18-7.13 (m, 3H), 5.50 (t, *J* = 8.0 Hz, 1H), 2.67 (d, *J* = 4.8 Hz, 3H), 2.39 (s, 3H), 2.24-2.19 (m, 1H); <sup>13</sup>C NMR (101 MHz, CDCl<sub>3</sub>) δ 177.0, 139.4, 138.6, 129.2, 128.7, 125.9, 122.4, 81.3, 30.9, 28.9, 21.4; IR (KBr) ν<sub>max</sub> (cm<sup>-1</sup>) 2927, 1776, 1181, 1030, 904, 786; MS (EI) *m/z* 56, 91, 121, 131, 161, 176.

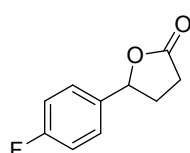**5-(4-Fluorophenyl)dihydrofuran-2(3*H*)-one (2e)** <sup>[1]</sup>

Yield: 81% (72.9 mg); Red thick oil; <sup>1</sup>H NMR (400 MHz, CDCl<sub>3</sub>) δ 7.35-7.33 (m, 2H), 7.12-7.07 (m, 2H), 5.50 (t, *J* = 8.0 Hz, 1H), 2.70-2.66 (m, 3H), 2.22-2.13 (m, 1H); <sup>13</sup>C NMR (100 MHz, CDCl<sub>3</sub>) δ 176.6, 162.7(d, *J* = 246.1 Hz), 135.1 (d, *J* = 2.4 Hz), 127.2 (d, *J* = 9.1 Hz), 115.7(d, *J* = 21.6 Hz), 80.7, 31.0, 29.0; IR (KBr) ν<sub>max</sub> (cm<sup>-1</sup>) 3532, 2931, 1779, 1511, 1226, 1026, 836; MS (EI) *m/z* 56, 95, 125, 135, 180.

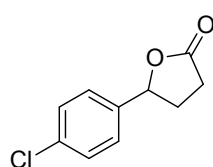**5-(4-Chlorophenyl)dihydrofuran-2(3*H*)-one (2f)** <sup>[1]</sup>

Yield: 84% (78.4 mg); Red thick oil; <sup>1</sup>H NMR (400 MHz, CDCl<sub>3</sub>) δ 7.37-7.35 (m, 2H), 7.28-7.26 (m, 2H), 5.48 (t, *J* = 7.2 Hz, 1H), 2.69-2.63 (m, 3H), 2.18-2.11 (m, 1H); <sup>13</sup>C NMR (CDCl<sub>3</sub>, 100 MHz) δ 176.6, 137.9, 134.3, 129.0, 126.7, 81.5, 30.9, 28.9; IR (KBr) ν<sub>max</sub> (cm<sup>-1</sup>) 3533, 2932, 2361, 1781, 1492, 1175, 1021, 812; MS (EI) *m/z* 56, 77, 117, 141, 161, 196.

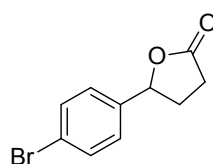**5-(4-Bromophenyl)dihydrofuran-2(3*H*)-one (2g)** <sup>[1]</sup>

Yield: 84% (96.4 mg); Yellow brown solid, M.p. 80-81 °C; <sup>1</sup>H NMR (400 MHz, CDCl<sub>3</sub>) δ 7.52 (s, 1H), 7.50 (s, 1H), 7.22 (s, 1H), 7.20 (s, 1H), 5.45 (t, *J* = 8.0 Hz, 1H), 2.67-2.62 (m, 3H), 2.17-2.11 (m, 1H); <sup>13</sup>C NMR (CDCl<sub>3</sub>, 100 MHz) δ 176.6, 138.5, 131.9, 127.0, 122.4, 80.5, 30.9, 28.9; IR (KBr) ν<sub>max</sub> (cm<sup>-1</sup>) 3532, 2927, 1782, 1489, 1174, 1018, 810; MS (EI) *m/z* 56, 77, 115, 161, 184, 241.

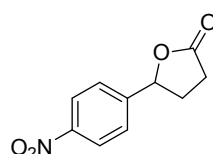**5-(4-Nitrophenyl)dihydrofuran-2(3*H*)-one (2h)** <sup>[1]</sup>

Yield: 79% (81.7 mg); Yellow solid, M.p. 81-82°C; <sup>1</sup>H NMR (400 MHz, CDCl<sub>3</sub>) δ 8.27 (d, *J* = 8.4 Hz, 2H), 7.53 (d, *J* = 8.4 Hz, 2H), 5.60 (t, *J* = 7.2 Hz, 1H), 2.78-2.68 (m, 3H), 2.19-2.14 (m, 1H); <sup>13</sup>C NMR (CDCl<sub>3</sub>, 100 MHz) δ 175.9, 147.9, 146.6, 125.9, 124.1, 79.6, 30.9, 28.6; IR (KBr) ν<sub>max</sub> (cm<sup>-1</sup>) 3062, 2923, 1782, 1522, 1346, 1170, 740; MS (EI) *m/z* 56, 91, 121, 149, 159, 175, 204, 207.

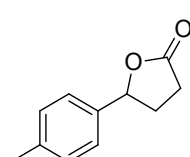**5-(*p*-Tolyl)dihydrofuran-2(3*H*)-one (2i)** <sup>[1]</sup>

Yield: 89% (78.3 mg); White solid, M.p. 76-78 °C; <sup>1</sup>H NMR (400 MHz, CDCl<sub>3</sub>) δ 7.28-7.20 (m, 4H), 5.50 (t, *J* = 7.2 Hz, 1H), 2.68-2.62 (m, 3H), 2.38 (s, 3H), 2.24-2.16 (m, 1H); <sup>13</sup>C NMR (CDCl<sub>3</sub>, 100

MHz)  $\delta$  177.0, 138.3, 136.4, 129.4, 125.4, 81.4, 30.9, 29.0, 21.2; IR (KBr)  $\nu_{\max}$  ( $\text{cm}^{-1}$ ) 3505, 2928, 1770, 1455, 1180, 940; MS (EI)  $m/z$  56, 91, 121, 132, 161, 176.

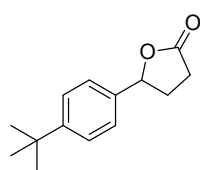

**5-(4-(*tert*-Butyl)phenyl)dihydrofuran-2(3*H*)-one (2j)** <sup>[1]</sup>

Yield: 92% (100.3 mg); Yellow solid, M.p. 56-57°C; <sup>1</sup>H NMR (400 MHz, CDCl<sub>3</sub>)  $\delta$  7.45 (s, 1H), 7.43 (s, 1H), 7.31 (s, 1H), 7.28 (s, 1H), 5.52 (t,  $J$  = 6.8 Hz, 1H), 2.69-2.65 (m, 3H), 2.26-2.20 (m, 1H), 1.35 (s, 9H); <sup>13</sup>C NMR (CDCl<sub>3</sub>, 100 MHz)  $\delta$  177.0, 151.6, 136.3, 125.7, 125.2, 81.3, 34.6, 31.3, 30.8, 29.1; IR (KBr)  $\nu_{\max}$  ( $\text{cm}^{-1}$ ) 3700, 2960, 2359, 1779, 1175, 1022, 835; MS (EI)  $m/z$  57, 85, 115, 161, 175, 203, 218.

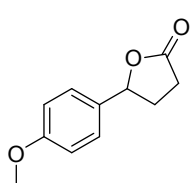

**5-(4-Methoxyphenyl)dihydrofuran-2(3*H*)-one (2k)** <sup>[1]</sup>

Yield: 91% (87.4 mg); Yellow solid, M.p. 53-54°C; <sup>1</sup>H NMR (400 MHz, CDCl<sub>3</sub>)  $\delta$  7.29-7.24 (m, 2H), 6.91 (d,  $J$  = 8.4 Hz, 2H), 5.47-5.44 (m, 1H), 3.81 (s, 3H), 2.64-2.58 (m, 3H), 2.21-2.17 (m, 1H); <sup>13</sup>C NMR (100 MHz, CDCl<sub>3</sub>)  $\delta$  176.9, 159.8, 131.2, 126.9, 114.1, 81.4, 55.4, 30.9, 29.2; IR (KBr)  $\nu_{\max}$  ( $\text{cm}^{-1}$ ) 3527, 2940, 2360, 1775, 1514, 1249, 1027, 834; MS (EI)  $m/z$  56, 77, 109, 137, 148, 161, 192.

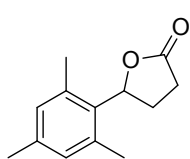

**5-Mesityldihydrofuran-2(3*H*)-one (2l)** <sup>[4]</sup>

Yield: 88% (89.8 mg); Red thick oil; <sup>1</sup>H NMR (400 MHz, CDCl<sub>3</sub>)  $\delta$  6.84 (s, 2H), 5.87 (dd,  $J$  = 10.4, 7.2 Hz, 1H), 2.73-2.69 (m, 2H), 2.56-2.47 (m, 1H), 2.32 (s, 6H), 2.28 (s, 1H), 2.25 (s, 3H); <sup>13</sup>C NMR (CDCl<sub>3</sub>, 100 MHz)  $\delta$  177.2, 137.9, 135.9, 131.2, 130.4, 79.5, 29.6, 29.0, 20.8, 20.5; IR (KBr)  $\nu_{\max}$  ( $\text{cm}^{-1}$ ) 3524, 2966, 1774, 1462, 1182, 1033, 857; MS (EI)  $m/z$  56, 91, 105, 121, 149, 159, 175, 204.

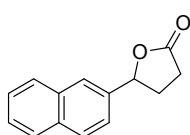

**5-(Naphthalen-2-yl)dihydrofuran-2(3*H*)-one (2m)** <sup>[1]</sup>

Yield: 87% (92.2 mg); Yellow solid, M.p. 117-118°C; <sup>1</sup>H NMR (400 MHz, CDCl<sub>3</sub>)  $\delta$  7.88-7.80 (m, 4H), 7.50 (d,  $J$  = 5.4 Hz, 2H), 7.40 (d,  $J$  = 8.4 Hz, 1H), 5.66 (d,  $J$  = 7.6 Hz, 1H), 2.74-2.66 (m, 3H), 2.29-2.25 (m, 1H); <sup>13</sup>C NMR (100 MHz, CDCl<sub>3</sub>)  $\delta$  176.9, 136.7, 133.2, 133.1, 128.8, 128.1, 127.8, 126.6, 126.5, 124.3, 122.9, 81.3, 30.9, 28.9; 2923, 2359, 1756, 1196, 1015, 901, 756; IR (KBr)  $\nu_{\max}$  ( $\text{cm}^{-1}$ ) MS (EI)  $m/z$  56, 128, 157, 167, 212.

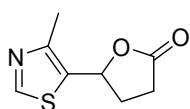

**5-(4-Methylthiazol-5-yl)dihydrofuran-2(3*H*)-one (2n)**

Yield: 72% (65.9 mg); Red thick oil; <sup>1</sup>H NMR (400 MHz, CDCl<sub>3</sub>)  $\delta$  8.73 (s, 1H), 5.79-5.75 (m, 1H), 2.76-2.69 (m, 3H), 2.50 (s, 3H), 2.31-2.24 (m, 1H); <sup>13</sup>C NMR (100 MHz, CDCl<sub>3</sub>)  $\delta$  175.6, 151.7, 151.6, 129.7, 74.9, 31.4, 29.1, 15.4; IR (KBr)  $\nu_{\max}$  ( $\text{cm}^{-1}$ ) 3081, 2928, 2361, 1778, 1414, 1144, 931, 809; MS (EI)  $m/z$  56, 100, 128, 139, 156, 183; HRMS-ESI ( $m/z$ ) calcd for C<sub>8</sub>H<sub>9</sub>NNaO<sub>2</sub>S [M + Na]<sup>+</sup> 206.0246, found 206.0248.

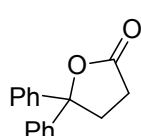

**5,5-Diphenyldihydrofuran-2(3*H*)-one (2o)** <sup>[5]</sup>

Yield: 88% (104.7 mg); Colorless oil;  $^1\text{H}$  NMR (400 MHz,  $\text{CDCl}_3$ )  $\delta$  7.45 (d,  $J = 7.6$  Hz, 4H), 7.37 (t,  $J = 7.6$  Hz, 4H), 7.30 (t,  $J = 7.6$  Hz, 2H), 2.94 (t,  $J = 7.6$  Hz, 2H), 2.61 (t,  $J = 7.6$  Hz, 2H);  $^{13}\text{C}$  NMR (100 MHz,  $\text{CDCl}_3$ )  $\delta$  175.8, 143.0, 128.6, 127.9, 125.4, 89.7, 35.7, 29.1; IR (KBr)  $\nu_{\text{max}}$  ( $\text{cm}^{-1}$ ) 3529, 2928, 2360, 1175, 1459, 1177, 1022, 754; MS (EI)  $m/z$  77, 105, 115, 161, 183, 238.

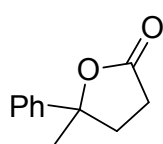

**5-Methyl-5-phenyldihydrofuran-2(3H)-one (2p)** <sup>[1]</sup>

Yield: 95% (83.6 mg); Red thick oil;  $^1\text{H}$  NMR (400 MHz,  $\text{CDCl}_3$ )  $\delta$  7.37 (d,  $J = 8.0$  Hz, 4H), 7.27-7.31 (m, 1H), 2.59-2.67 (m, 1H), 2.41-2.53 (m, 3H), 1.72, (s, 3H);  $^{13}\text{C}$  NMR (100 MHz,  $\text{CDCl}_3$ )  $\delta$  176.5, 144.3, 128.6, 127.6, 124.1, 87.0, 36.2, 29.4, 29.0; IR (KBr)  $\nu_{\text{max}}$  ( $\text{cm}^{-1}$ ) 3527, 2932, 2361, 1773, 1454, 1161, 1014, 703; MS (EI)  $m/z$  77, 107, 117, 158, 176.

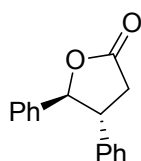

**trans-4,5-Diphenyldihydrofuran-2(3H)-one (2q-1)** <sup>[6]</sup>

Yield: 48% (57.1 mg); White solid, M.p. 109-110 °C;  $^1\text{H}$  NMR (400 MHz,  $\text{CDCl}_3$ )  $\delta$  7.37-7.28 (m, 6H), 7.19 (t,  $J = 7.2$  Hz, 4H), 5.43 (d,  $J = 8.4$  Hz, 1H), 3.60 (dd,  $J = 19.2$ ,  $J = 8.4$  Hz, 1H), 3.07 (dd,  $J = 17.6$ ,  $J = 8.4$  Hz, 1H), 2.92 (dd,  $J = 17.6$ ,  $J = 10.8$  Hz, 1H);  $^{13}\text{C}$  NMR ( $\text{CDCl}_3$ , 100 MHz)  $\delta$  175.3, 138.0, 137.8, 129.1, 128.7, 127.9, 127.4, 125.7, 87.5, 50.6, 37.2; IR (KBr)  $\nu_{\text{max}}$  ( $\text{cm}^{-1}$ ) 3359, 2922, 2361, 1783, 1456, 1198, 996, 698; MS (EI)  $m/z$  77, 91, 105, 115, 161, 183, 238.

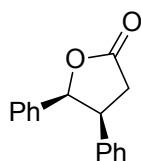

**cis-4,5-Diphenyldihydrofuran-2(3H)-one (2q-2)** <sup>[6]</sup>

Yield: 43% (51.2 mg); White solid, M.p. 106-108 °C;  $^1\text{H}$  NMR (400 MHz,  $\text{CDCl}_3$ )  $\delta$  7.13-7.08 (m, 6H), 6.90 (dd,  $J = 6.4$ ,  $J = 2.8$  Hz, 2H), 6.81 (dd,  $J = 6.4$ ,  $J = 3.2$  Hz, 2H), 5.83 (d,  $J = 6.8$  Hz, 1H), 4.06 (dd,  $J = 14.8$ ,  $J = 6.8$  Hz, 1H), 3.05 (dd,  $J = 17.6$ ,  $J = 8.0$  Hz, 1H), 2.94 (dd,  $J = 17.6$ , 6.4 Hz, 1H);  $^{13}\text{C}$  NMR ( $\text{CDCl}_3$ , 100 MHz)  $\delta$  176.7, 136.7, 135.5, 128.3, 128.0, 127.9, 127.9, 127.4, 125.7, 84.7, 46.9, 34.9; IR (KBr)  $\nu_{\text{max}}$  ( $\text{cm}^{-1}$ ) 3358, 2923, 2361, 1780, 1173, 697; MS (EI)  $m/z$  77, 91, 105, 115, 161, 183, 238.

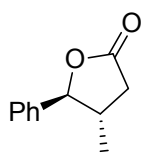

**trans-4-Methyl-5-phenyldihydrofuran-2(3H)-one (2r-1)** <sup>[5]</sup>

Yield: 54% (47.5 mg); Yellow oil;  $^1\text{H}$  NMR (400 MHz,  $\text{CDCl}_3$ )  $\delta$  7.41-7.36 (m, 2H), 7.34-7.26 (m, 3H), 5.58 (d,  $J = 4.8$  Hz, 1H), 2.76-2.71 (m, 1H), 2.43-2.32 (m, 2H), 1.33 (d,  $J = 7.2$  Hz, 3H);  $^{13}\text{C}$  NMR (100 MHz,  $\text{CDCl}_3$ )  $\delta$  179.9, 139.8, 128.8, 128.2, 124.9, 78.4, 38.4, 33.6, 15.4; IR (KBr)  $\nu_{\text{max}}$  ( $\text{cm}^{-1}$ ) 2928, 2359, 1780, 1212, 999, 702; MS (EI)  $m/z$  77, 91, 107, 117, 131, 158, 176.

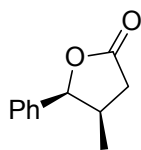

**cis-4-Methyl-5-phenyldihydrofuran-2(3H)-one (2r-2)** <sup>[5]</sup>

Yield: 33% (29.0 mg); Yellow oil;  $^1\text{H}$  NMR (400 MHz,  $\text{CDCl}_3$ )  $\delta$  7.38-7.34 (m, 5H), 5.36 (t,  $J = 7.6$  Hz, 1H), 2.81 (dd,  $J = 12.0$ ,  $J = 8.4$  Hz, 2H), 1.85 (d,  $J = 10.4$  Hz, 1H), 1.33 (d,  $J = 4.8$  Hz, 3H);  $^{13}\text{C}$  NMR (100 MHz,  $\text{CDCl}_3$ )  $\delta$  179.2, 139.1, 128.7, 128.5, 125.5, 79.2, 39.9, 36.4, 15.0; IR (KBr)  $\nu_{\text{max}}$

( $\text{cm}^{-1}$ ) 2928, 2359, 1780, 1212, 999, 702; MS (EI)  $m/z$  77, 91, 107, 117, 131, 158, 176.

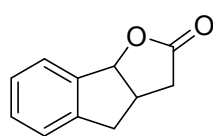

**3,3a,4,8b-Tetrahydro-2H-indeno[1,2-b]furan-2-one (2s)** [7]

Yield: 83% (72.2 mg); Yellow solid. M.p. 67-68°C;  $^1\text{H}$  NMR (400 MHz,  $\text{CDCl}_3$ )  $\delta$  7.49 (d,  $J = 7.6$  Hz, 1H), 7.58-7.35 (m, 1H), 7.32-7.28 (t,  $J = 7.6$  Hz, 2H), 5.90 (d,  $J = 4.0$  Hz, 1H), 3.38-3.30 (m, 2H), 2.95-2.88 (m, 2H), 2.40 (dd,  $J = 18.0$ ,  $J = 5.4$  Hz, 1H);  $^{13}\text{C}$  NMR (100 MHz,  $\text{CDCl}_3$ )  $\delta$  177.0, 142.6, 138.8, 129.9, 127.6, 126.4, 125.4, 87.7, 37.9, 37.3, 35.7; IR (KBr)  $\nu_{\text{max}}$  ( $\text{cm}^{-1}$ ) 3532, 2930, 2357, 1775, 1462, 1178, 1014, 751; MS (EI)  $m/z$  63, 89, 114, 130, 145, 174.

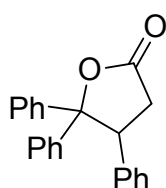

**4,5,5-Triphenyldihydrofuran-2(3H)-one (2t)** [8]

Yield: 75% (117.7 mg); White solid, M.p. 162-163 °C;  $^1\text{H}$  NMR (400 MHz,  $\text{CDCl}_3$ )  $\delta$  7.64 (d,  $J = 7.8$  Hz, 2H), 7.40 (t,  $J = 7.6$  Hz, 2H), 7.32 (t,  $J = 7.2$  Hz, 1H), 7.12 (d,  $J = 2.4$  Hz, 3H), 7.06 (s, 5H), 6.95 (s, 2H), 4.49 (dd,  $J = 7.6$ ,  $J = 4.8$  Hz, 1H), 2.99 (dd,  $J = 17.6$ ,  $J = 8.0$  Hz, 1H), 2.80 (dd,  $J = 17.6$ ,  $J = 4.4$  Hz, 1H);  $^{13}\text{C}$  NMR (100 MHz,  $\text{CDCl}_3$ )  $\delta$  175.8, 143.2, 139.9, 138.5, 128.7, 128.6, 128.4, 128.2, 127.7, 127.3, 127.2, 126.3, 126.1, 92.9, 51.0, 37.5; IR (KBr)  $\nu_{\text{max}}$  ( $\text{cm}^{-1}$ ) 3061, 2359, 1777, 1450, 1221, 981, 699; MS (EI)  $m/z$  77, 91, 104, 165, 183, 256, 314.

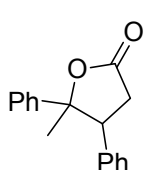

**5-Methyl-4,5-diphenyldihydrofuran-2(3H)-one (2u)** [9]

Yield: 81% (102.1 mg); White solid. M.p. 112-113 °C;  $^1\text{H}$  NMR (400 MHz,  $\text{CDCl}_3$ )  $\delta$  7.39-7.32 (m, 8H), 7.15-7.13 (m, 2H), 3.76 (t,  $J = 7.8$  Hz, 1H), 2.90 (dd,  $J = 8.0$ ,  $J = 3.2$  Hz, 2H), 1.37 (s, 3H);  $^{13}\text{C}$  NMR (100 MHz,  $\text{CDCl}_3$ )  $\delta$  175.9, 144.3, 137.3, 128.8, 128.6, 128.2, 127.9, 127.8, 124.5, 89.6, 52.9, 35.2, 24.1; IR (KBr)  $\nu_{\text{max}}$  ( $\text{cm}^{-1}$ ) 3031, 2929, 2361, 1777, 1450, 1224, 1055, 761; MS (EI)  $m/z$  77, 91, 104, 121, 179, 224, 252.

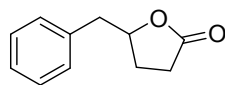

**5-Benzoyldihydrofuran-2(3H)-one (2v)** [6]

Yield: 82% (72.2 mg); Red thick oil;  $^1\text{H}$  NMR (400 MHz,  $\text{CDCl}_3$ )  $\delta$  7.33-7.30 (m, 2H), 7.27-7.22 (m, 3H), 4.73 (t,  $J = 8.0$  Hz, 1H), 3.07 (dd,  $J = 14.0$ ,  $J = 6.0$  Hz, 1H), 2.93 (dd,  $J = 14.0$ ,  $J = 6.0$  Hz, 1H), 2.40-2.38 (m, 2H), 2.27-2.22 (m, 1H), 1.98-1.92 (m, 1H);  $^{13}\text{C}$  NMR ( $\text{CDCl}_3$ , 100 MHz)  $\delta$  177.0, 135.9, 129.5, 128.7, 127.0, 80.8, 41.3, 28.7, 27.1; IR (KBr)  $\nu_{\text{max}}$  ( $\text{cm}^{-1}$ ) 3524, 3029, 2926, 2361, 1771, 1454, 1174, 1022, 915, 701; MS (EI)  $m/z$  57, 85, 91, 176.

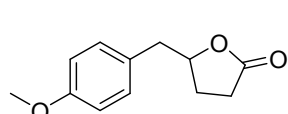

**5-(4-Methoxybenzyl)dihydrofuran-2(3H)-one (2w)** [10]

Yield: 83% (85.5 mg); Yellow oil;  $^1\text{H}$  NMR (400 MHz,  $\text{CDCl}_3$ )  $\delta$  7.14 (d,  $J = 8.0$  Hz, 2H), 6.85 (d,  $J = 8.4$  Hz, 2H), 4.73-4.66 (m, 1H), 3.79 (s, 3H), 3.00 (dd,  $J = 14.0$ ,  $J = 6.0$  Hz, 1H), 2.88 (dd,  $J = 14.0$ ,  $J = 6.0$  Hz, 1H), 2.51-2.40 (m, 1H), 2.40-2.29 (m, 1H), 2.29-2.19 (m, 1H), 2.00-1.91 (m, 1H);  $^{13}\text{C}$  NMR ( $\text{CDCl}_3$ , 100 MHz)  $\delta$  177.1, 158.7, 130.5, 127.8, 114.1, 81.0, 55.3,

40.4, 28.7, 27.0; IR (KBr)  $\nu_{\max}$  (cm<sup>-1</sup>) 2929, 2841, 2359, 1772, 1512, 1250, 1176, 1028, 740; MS (EI) m/z 57, 85, 121, 206.

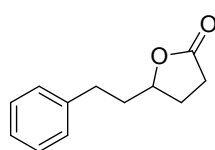

**5-Phenethyldihydrofuran-2(3H)-one (2x)** [11]

Yield: 82% (77.9 mg); Red thick oil; <sup>1</sup>H NMR (400 MHz, CDCl<sub>3</sub>)  $\delta$  7.30-7.27 (m, 2H), 7.21-7.18 (m, 3H), 4.45 (dd,  $J = 6.4$ ,  $J = 5.2$  Hz, 1H), 2.81-2.78 (m, 1H), 2.75-2.70 (m, 1H), 2.53-2.49 (m, 2H), 2.31-2.26 (m, 1H), 2.04-2.00 (m, 1H), 1.91-1.84 (m, 2H); <sup>13</sup>C NMR (CDCl<sub>3</sub>, 100 MHz)  $\delta$  177.3, 140.8, 128.6, 128.5, 126.2, 79.9, 37.4, 31.7, 28.9, 28.0; IR (KBr)  $\nu_{\max}$  (cm<sup>-1</sup>) MS 3524, 2934, 2357, 1774, 1452, 1177, 751; (EI) m/z 65, 91, 117, 130, 190.

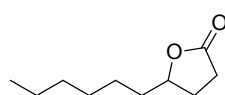

**5-Hexyldihydrofuran-2(3H)-one (2y)** [11]

Yield: 63% (53.5 mg); Yellow oil; <sup>1</sup>H NMR (400 MHz, CDCl<sub>3</sub>)  $\delta$  4.51-4.47 (m, 1H), 2.53 (t,  $J = 8.0$  Hz, 2H), 2.32 (dd,  $J = 12.4$ , 6.4 Hz, 1H), 1.93-1.81 (m, 1H), 1.81-1.67 (m, 1H), 1.67-1.54 (m, 1H), 1.46-1.27 (m, 8H), 0.88 (d,  $J = 5.6$  Hz, 3H); <sup>13</sup>C NMR (101 MHz, CDCl<sub>3</sub>)  $\delta$  177.4, 81.1, 35.6, 31.6, 28.9, 28.9, 27.9, 25.2, 22.5, 14.0; IR (KBr)  $\nu_{\max}$  (cm<sup>-1</sup>) 2930, 2860, 2361, 1775, 1461, 1180, 912, 652; MS (EI) m/z 55, 85, 95, 126, 170.

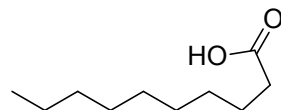

**Decanoic acid (2y-1)** [13]

Yield: 30% (25.8 mg); Yellow oil; <sup>1</sup>H NMR (400 MHz, CDCl<sub>3</sub>)  $\delta$  9.95 (s, 1H), 2.37 (t,  $J = 7.2$  Hz, 2H), 1.65 (d,  $J = 6.8$  Hz, 2H), 1.29 (s, 14H), 0.90 (d,  $J = 6.8$  Hz, 3H); <sup>13</sup>C NMR (100 MHz, CDCl<sub>3</sub>)  $\delta$  180.3, 34.1, 31.9, 29.7, 29.4, 29.2, 29.1, 24.7, 22.7, 14.1; IR (KBr)  $\nu_{\max}$  (cm<sup>-1</sup>) 2926, 2858, 2361, 1711, 1459, 1286, 937, 671; MS (EI) m/z 65, 84, 98, 112, 130, 155, 172.

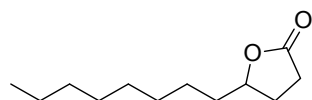

**5-Octyldihydrofuran-2(3H)-one (2z)** [12]

Yield: 61% (60.4 mg); Yellow oil; <sup>1</sup>H NMR (400 MHz, CDCl<sub>3</sub>)  $\delta$  4.48 (dd,  $J = 13.2$ , 6.5 Hz, 1H), 2.52 (t,  $J = 8.0$  Hz, 2H), 2.32 (m, 1H), 1.82-1.76 (m, 1H), 1.74-1.69 (m, 1H), 1.61-1.54 (m, 1H), 1.46-1.27 (m, 14H), 0.88 (t,  $J = 5.6$  Hz, 3H); <sup>13</sup>C NMR (100 MHz, CDCl<sub>3</sub>)  $\delta$  177.3, 81.1, 35.5, 31.8, 29.4, 29.3, 29.1, 28.8, 27.9, 25.2, 22.6, 14.0; IR (KBr)  $\nu_{\max}$  (cm<sup>-1</sup>) MS 3534, 2927, 2857, 2361, 1777, 1460, 1179, 982, 651; (EI) m/z 55, 85, 96, 128, 151, 180, 198.

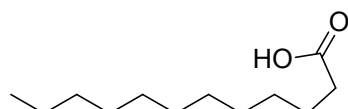

**Dodecanoic acid (2z-1)** [13]

Yield: 27% (27.0 mg); Yellow solid, M.p. 53-54°C; <sup>1</sup>H NMR (400 MHz, CDCl<sub>3</sub>)  $\delta$  10.88 (s, 1H), 2.34 (t,  $J = 7.3$  Hz, 2H), 1.63 (t,  $J = 4$  Hz, 2H), 1.26 (s, 16H), 0.88 (t,  $J = 4$  Hz, 3H); <sup>13</sup>C NMR (100 MHz, CDCl<sub>3</sub>)  $\delta$  180.5, 34.1, 31.9, 29.6, 29.4, 29.3, 29.2, 29.1, 24.7, 22.7, 14.1; IR (KBr)  $\nu_{\max}$  (cm<sup>-1</sup>) 2926, 2857, 2361, 1710, 1272, 936, 738; MS (EI) m/z 84, 98, 112, 140, 183, 200.

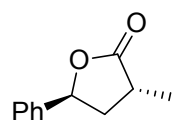

**trans-3-Methyl-5-phenyldihydrofuran-2(3H)-one (3a-1)** [1]

Yield: 38% (33.4 mg); Yellow oil;  $^1\text{H NMR}$  (400 MHz,  $\text{CDCl}_3$ )  $\delta$  7.41-7.36 (m, 2H), 7.34-7.26 (m, 3H), 5.58 (d,  $J = 4.9$  Hz, 1H), 2.76-2.71 (m, 1H), 2.43-2.32 (m, 2H), 1.33 (d,  $J = 7.0$  Hz, 3H);  $^{13}\text{C NMR}$  (100 MHz,  $\text{CDCl}_3$ )  $\delta$  179.9, 139.8, 128.8, 128.2, 124.9, 78.4, 38.4, 33.6, 15.4; IR (KBr)  $\nu_{\text{max}}$  ( $\text{cm}^{-1}$ ) 2933, 2881, 2361, 1774, 1456, 1172, 1012, 700; MS (EI)  $m/z$  77, 91, 105, 117, 132, 176.

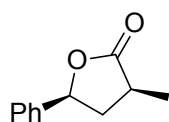

**cis-3-Methyl-5-phenyldihydrofuran-2(3H)-one (3a-2)**<sup>[1]</sup>

Yield: 40% (35.2 mg); Yellow oil;  $^1\text{H NMR}$  (400 MHz,  $\text{CDCl}_3$ )  $\delta$  7.38-7.34 (m, 5H), 5.41-5.30 (m, 1H), 2.81 (dd,  $J = 11.8, 8.6$  Hz, 2H), 1.85 (d,  $J = 10.4$  Hz, 1H), 1.33 (d,  $J = 5.0$  Hz, 3H);  $^{13}\text{C NMR}$  (100 MHz,  $\text{CDCl}_3$ )  $\delta$  179.2, 139.1, 128.7, 128.5, 125.5, 79.2, 39.9, 36.4, 15.0; IR (KBr)  $\nu_{\text{max}}$  ( $\text{cm}^{-1}$ ) 2932, 2879, 2361, 1773, 1454, 1161, 1014, 753; MS (EI)  $m/z$  77, 91, 105, 117, 132, 176.

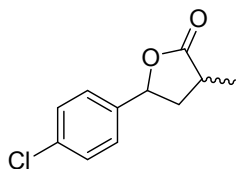

**5-(4-Chlorophenyl)-3-methyldihydrofuran-2(3H)-one (3b)**<sup>[1]</sup>

Yield: 83% (87.1 mg); Yellow oil;  $^1\text{H NMR}$  (400 MHz,  $\text{CDCl}_3$ )  $\delta$  7.23-7.36 (m, 4H), 5.53 (q,  $J = 6.8$  Hz, 0.44H), 5.32 (q,  $J = 5.6$  Hz, 0.55H), 2.68-2.87 (m, 1.5H), 2.35-2.40 (m, 1H), 1.75-1.85 (m, 0.5H), 1.32 (dd,  $J = 4.0$  Hz, 3H);  $^{13}\text{C NMR}$  (100 MHz,  $\text{CDCl}_3$ )  $\delta$  179.6, 178.9, 138.3, 137.7, 134.2, 134.0, 128.91, 128.89, 126.9, 126.5, 78.4, 77.7, 39.9, 36.3, 38.2, 33.6, 15.4, 14.9; IR (KBr)  $\nu_{\text{max}}$  ( $\text{cm}^{-1}$ ) 3491, 2921, 2336, 1772, 1439, 1198, 1089, 756; MS (EI)  $m/z$  75, 91, 111, 115, 131, 151, 175, 230, 210.

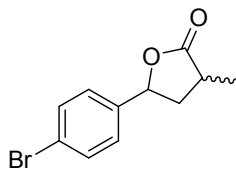

**5-(4-Bromophenyl)-3-methyldihydrofuran-2(3H)-one (3c)**<sup>[1]</sup>

Yield: 73% (92.7 mg); White solid, M.p., 95-97 °C;  $^1\text{H NMR}$  (400 MHz,  $\text{CDCl}_3$ )  $\delta$  7.17-7.51 (m, 4H), 5.51 (q,  $J = 6.8$  Hz, 0.55H), 5.31 (q,  $J = 5.6$  Hz, 0.45H), 2.68-2.81 (m, 1.47H), 2.35-2.38 (m, 1.87H), 1.31-1.33 (m, 3H);  $^{13}\text{C NMR}$  (100 MHz,  $\text{CDCl}_3$ )  $\delta$  179.6, 178.9, 138.9, 138.2, 131.9, 131.8, 127.2, 126.8, 122.3, 122.1, 78.4, 77.7, 39.9, 38.2, 36.3, 33.6, 15.4, 14.9; IR (KBr)  $\nu_{\text{max}}$  ( $\text{cm}^{-1}$ ) 3362, 2921, 2362, 1771, 1486, 1196, 756; MS (EI)  $m/z$  77, 91, 116, 131, 175, 185, 210, 254.

## References:

- [1] L. Huang, H. Jiang, C. Qi and X. Liu, *J. Am. Chem. Soc.*, 2010, **132**, 17652.
- [2] S. K. Rodrigo and H. Guan, *J. Org. Chem.*, 2012, **77**, 8303.
- [3] Y. Su, Y.-Q. Tu and P. Gu, *Org. Lett.*, 2014, **16**, 4204.
- [4] S. Makoto, K. Akira and U. Fumihiko, *Chem. & Pharm. Bull.*, 1981, **29**, 2885.
- [5] T. Dohi, N. Takenaga, A. Goto, A. Maruyama and Y. Kita, *Org. Lett.*, 2007, **9**, 3129.
- [6] Y. Gao, J. Xu, P. Zhang, H. Fang, G. Tang and Y. Zhao, *RSC Adv.*, 2015, **5**, 36167.
- [7] X.-J. Wei, D.-T. Yang, L. Wang, T. Song, L.-Z. Wu and Q. Liu, *Org. Lett.*, 2013, **15**, 6054.
- [8] D. Enders, M. Kroll, G. Raabe and J. Runsink, *Angew. Chem. Int. Ed.*, 1998, **37**, 1673.
- [9] W.-Y. Yu, C. Bensimon and H. Alper, *Chem. Eur. J.*, 1997, **3**, 417.
- [10] S. Protti, M. Fagnoni and A. Albini, *J. Am. Chem. Soc.*, 2006, **128**, 10670.
- [11] C. Shu, M.-Q. Liu, Y.-Z. Sun and L.-W. Ye, *Org. Lett.*, 2012, **14**, 4958.



- [12] J.-A. Hislop, M. B. Hunt, S. Fielder and D. D. Rowan, *J. Agric. Food Chem.*, 2004, **52**, 7075
- [13] M. Bartra and J. Vilarrasa, *J. Org. Chem.*, 1991, **56**, 5132.

#### **4. Copies of NMR spectra**

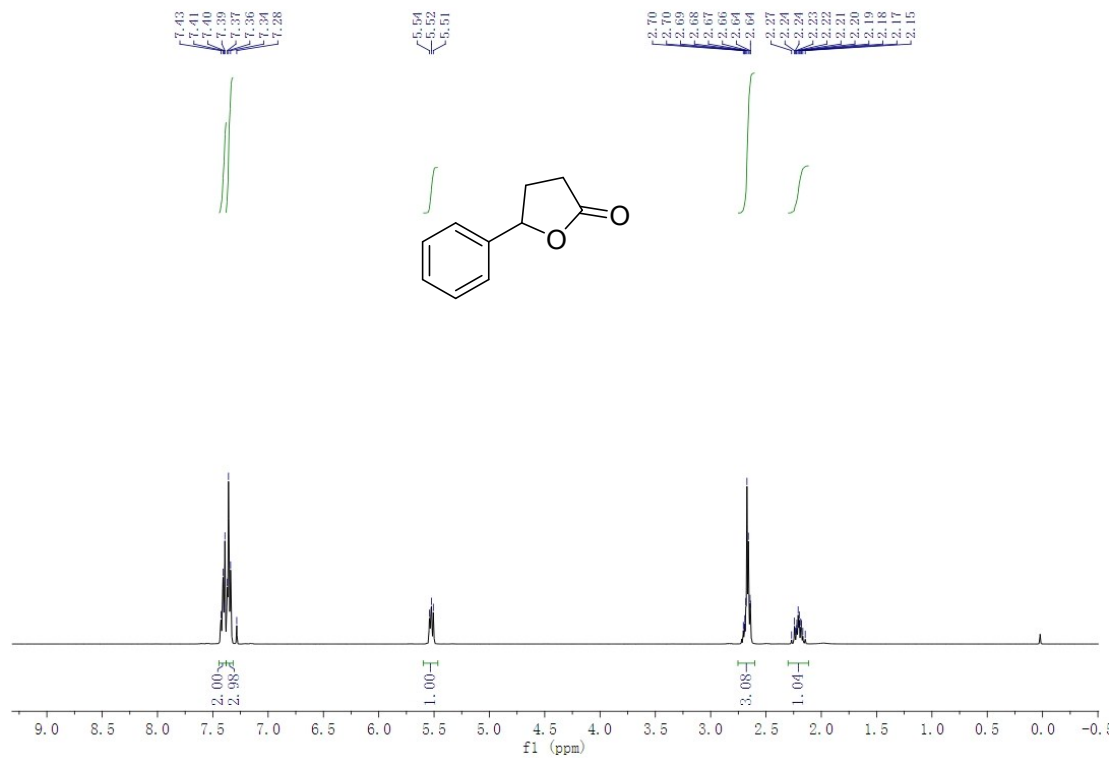

<sup>1</sup>H NMR of **2a**

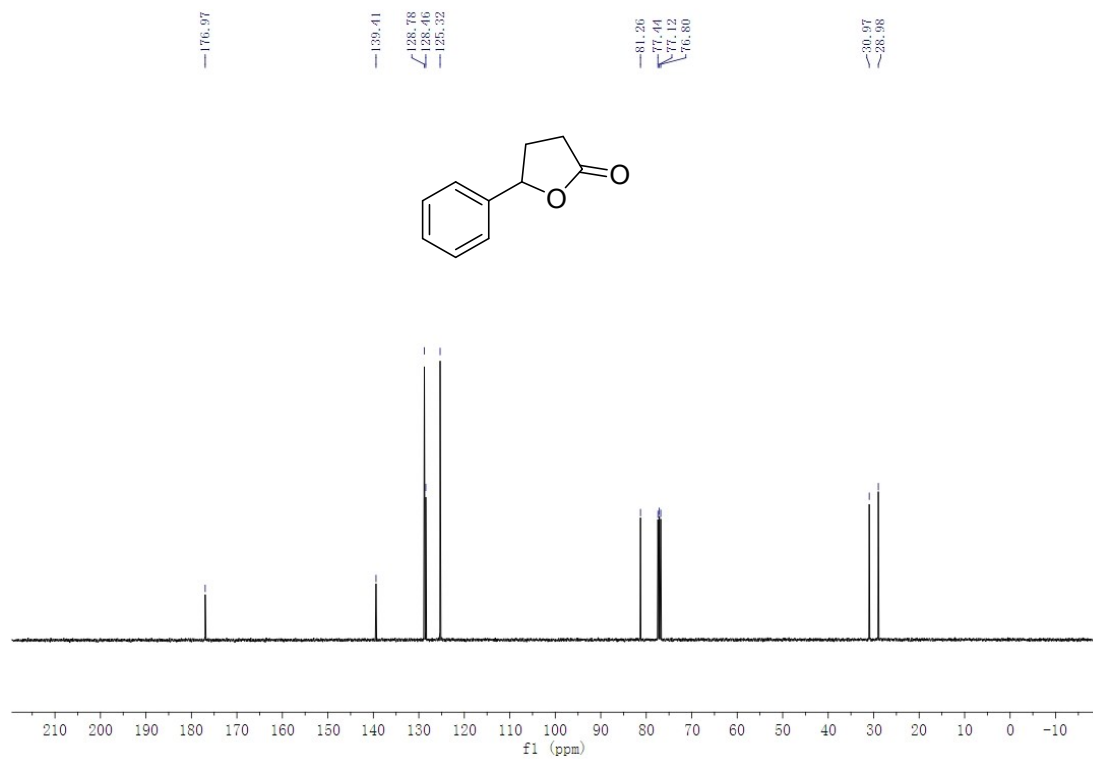

<sup>13</sup>C NMR of **2a**

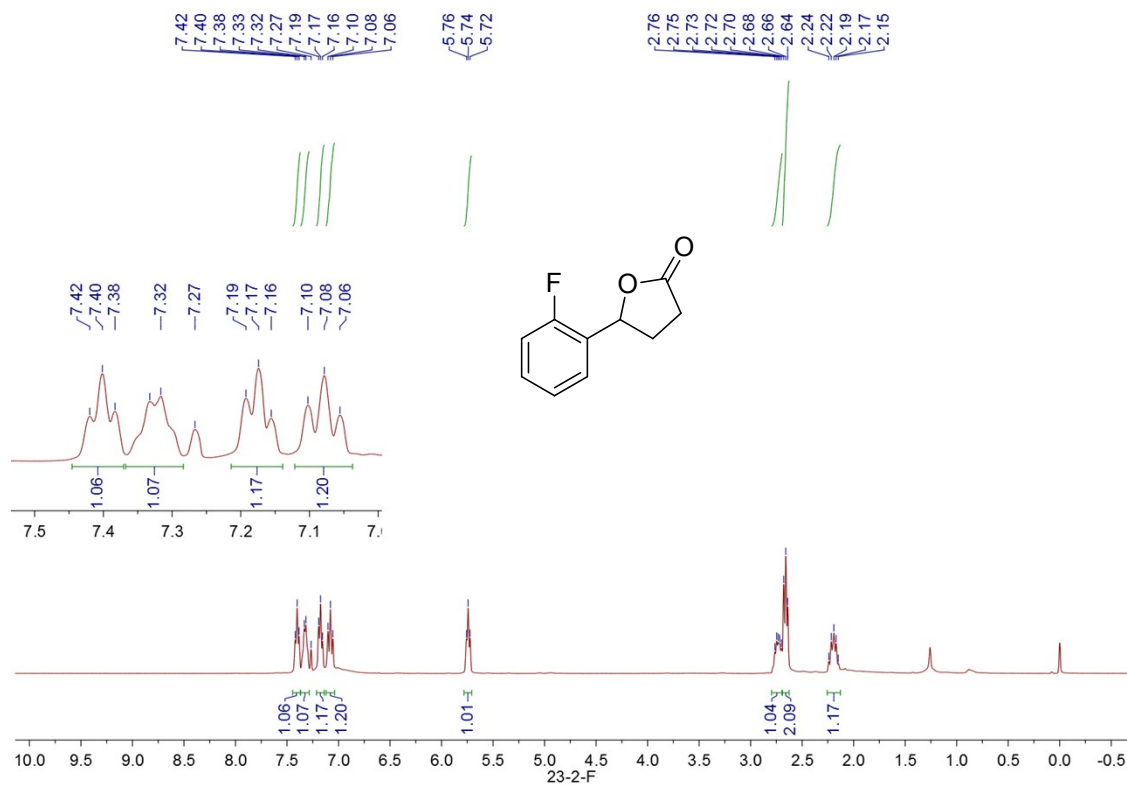

<sup>1</sup>H NMR of **2b**

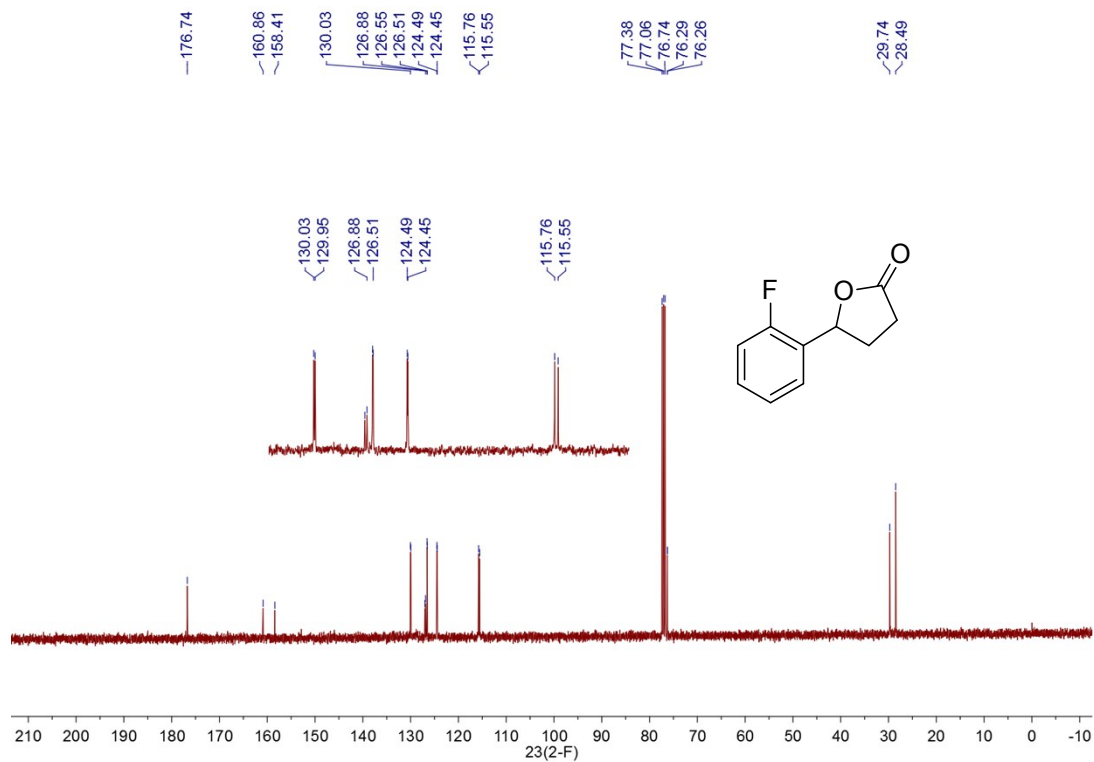

<sup>13</sup>C NMR of **2b**

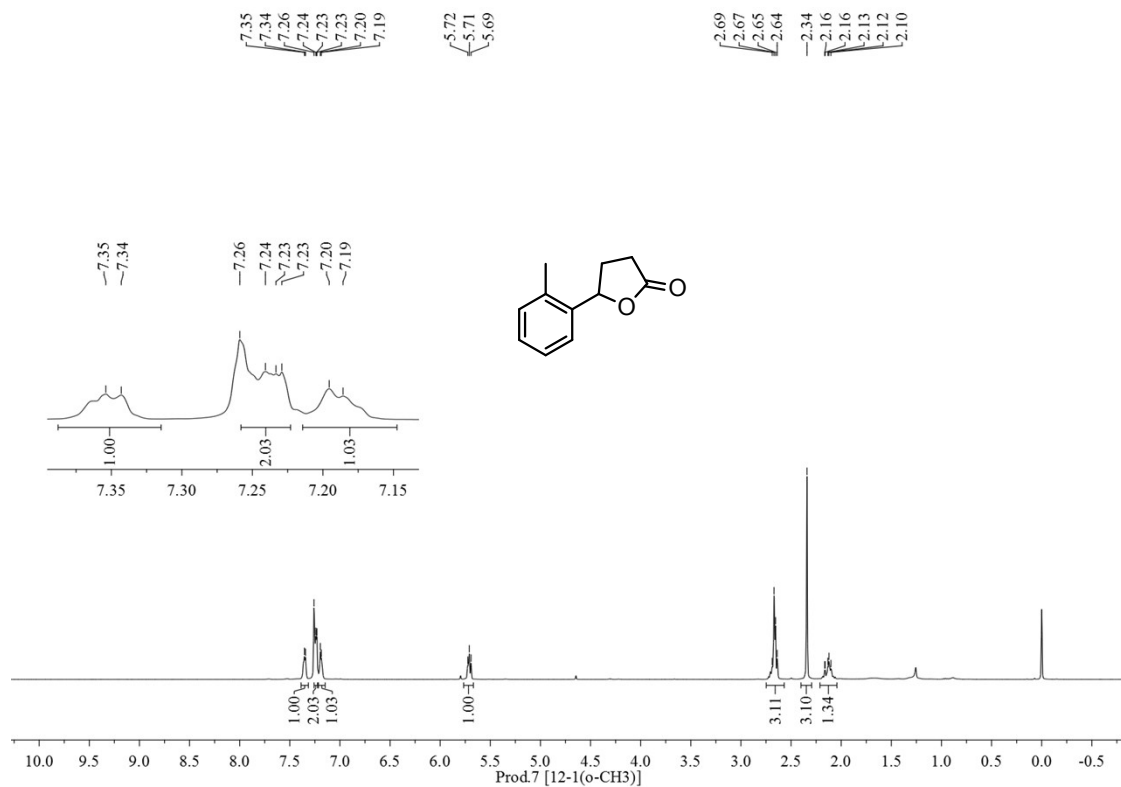

<sup>1</sup>H NMR of 2c

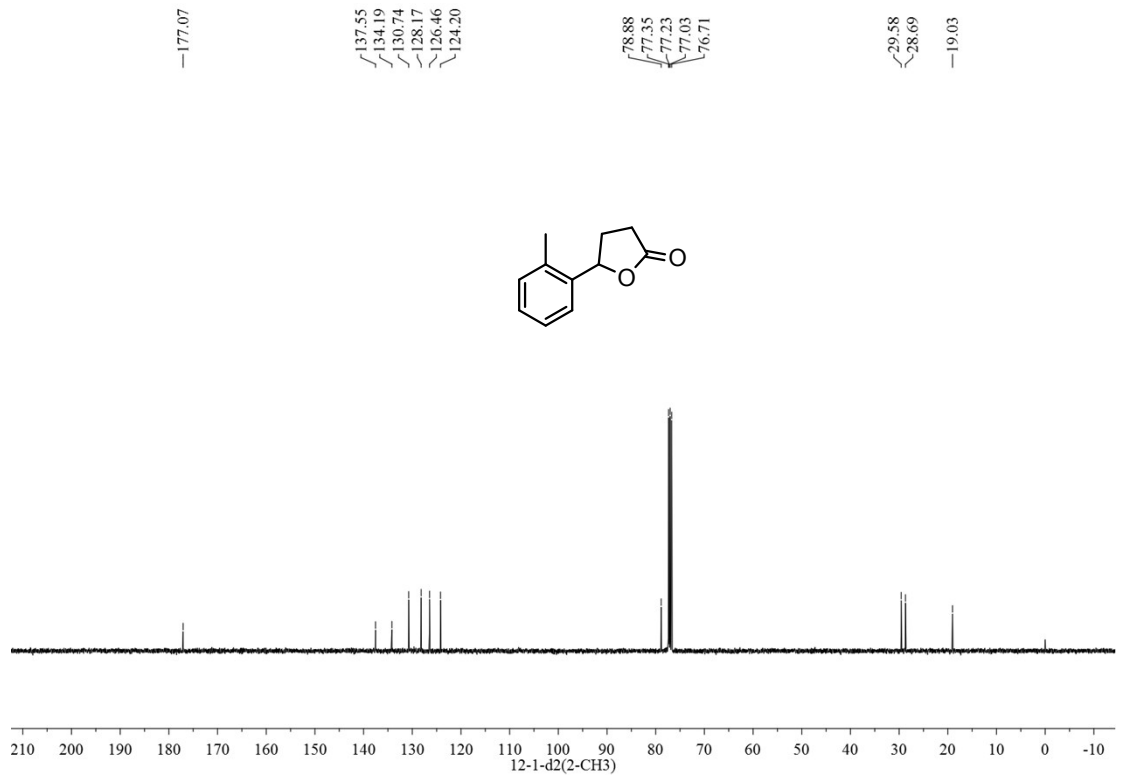

<sup>13</sup>C NMR of 2c

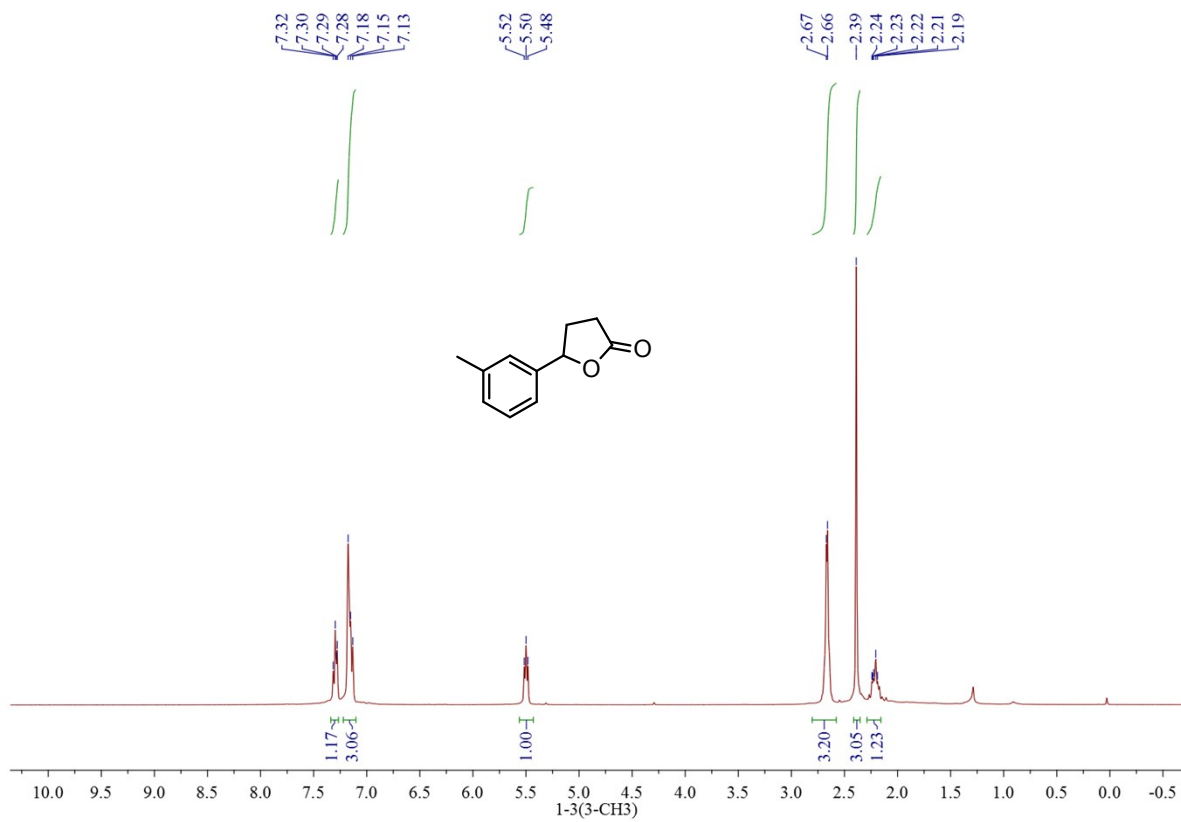

$^1\text{H}$  NMR of **2d**

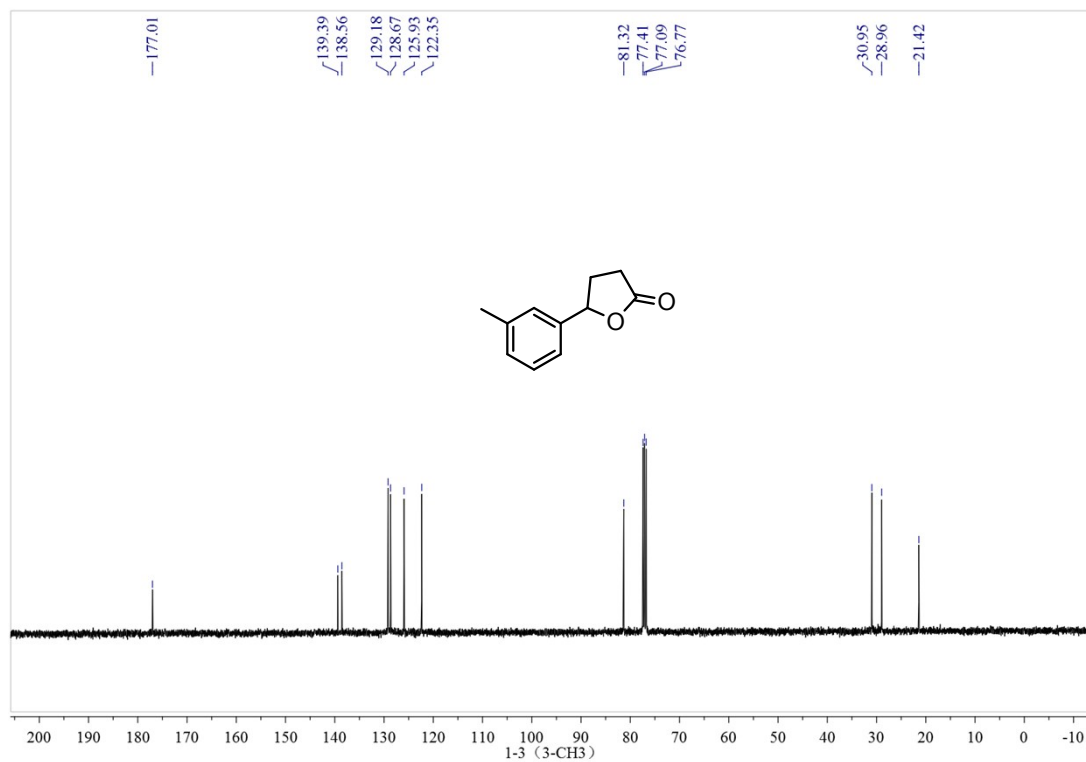

$^{13}\text{C}$  NMR of **2d**

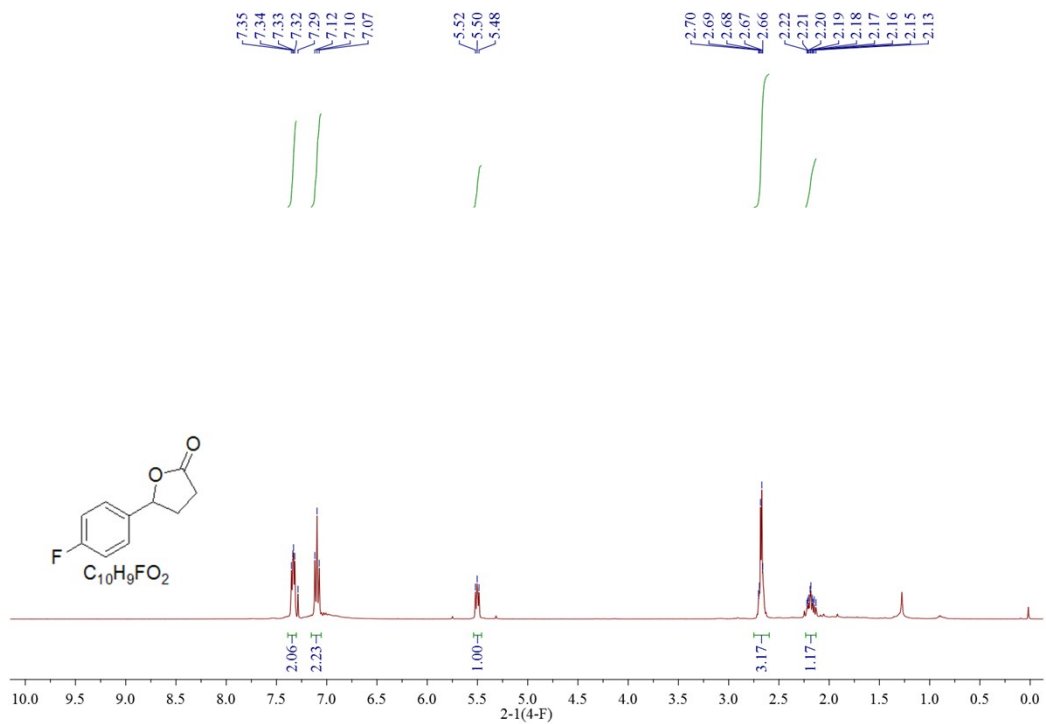

$^1H$  NMR of **2e**

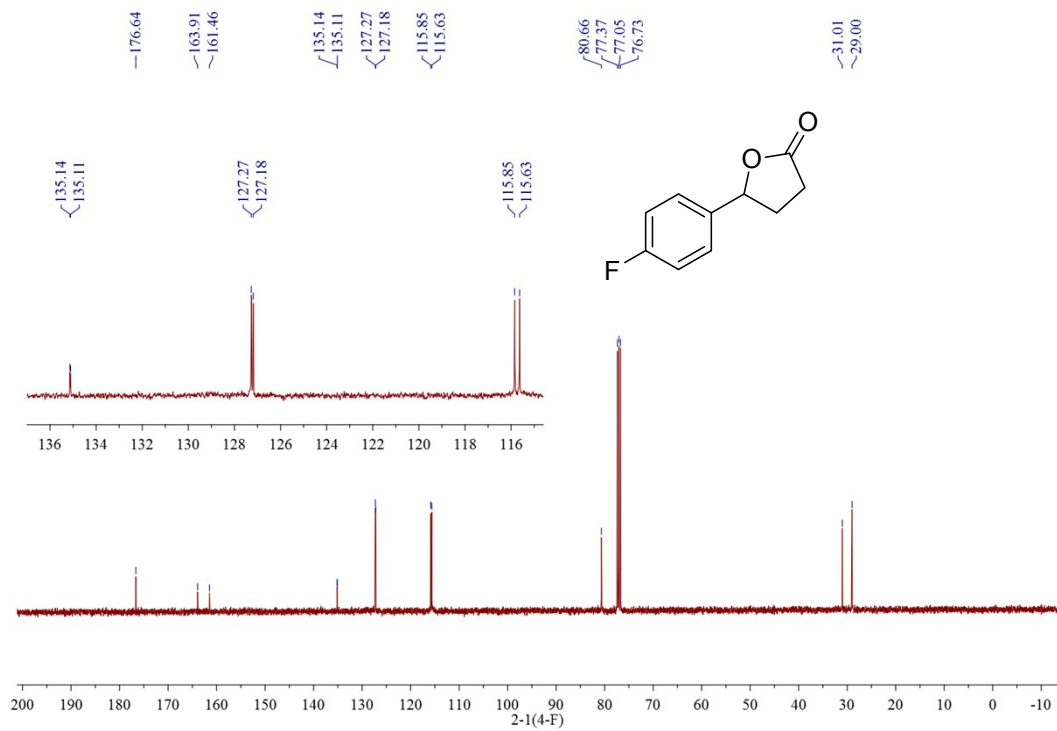

$^{13}C$  NMR of **2e**

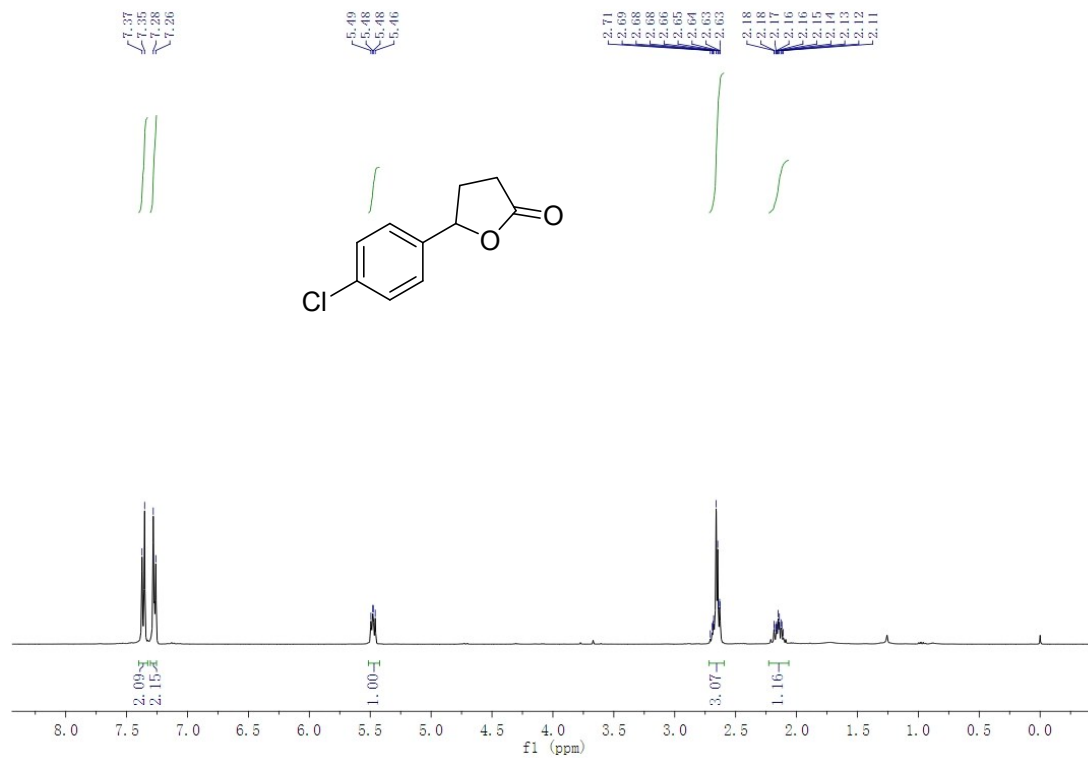

<sup>1</sup>H NMR of **2f**

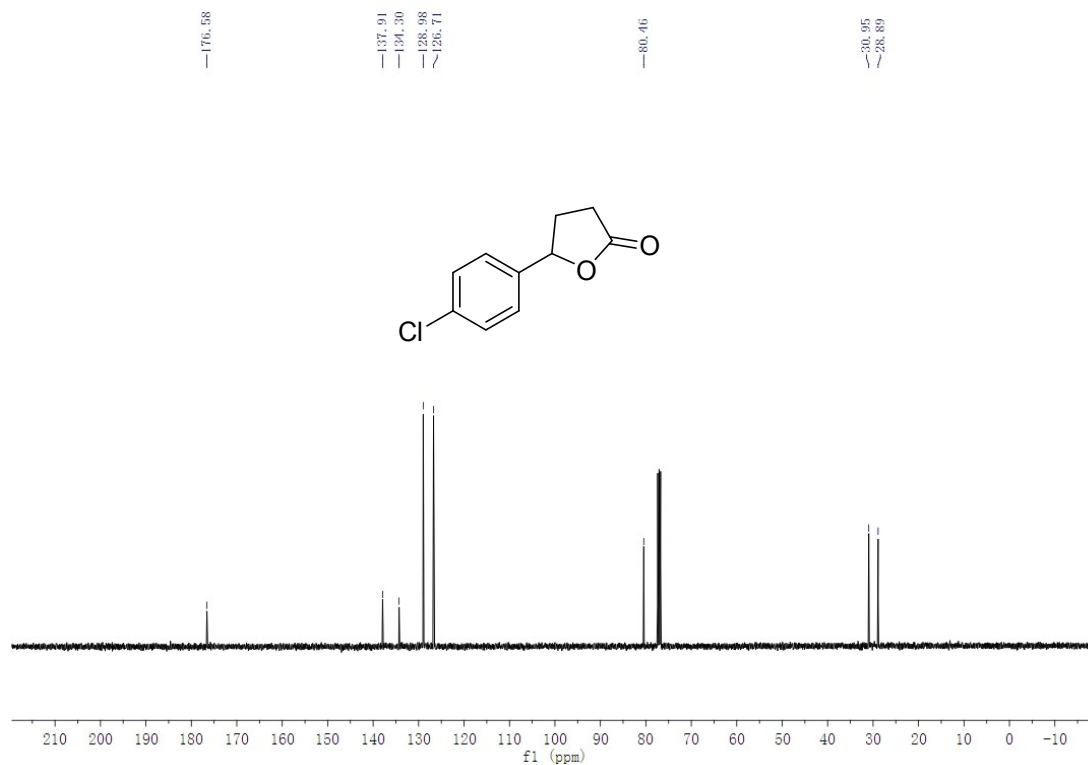

<sup>13</sup>C NMR of **2f**

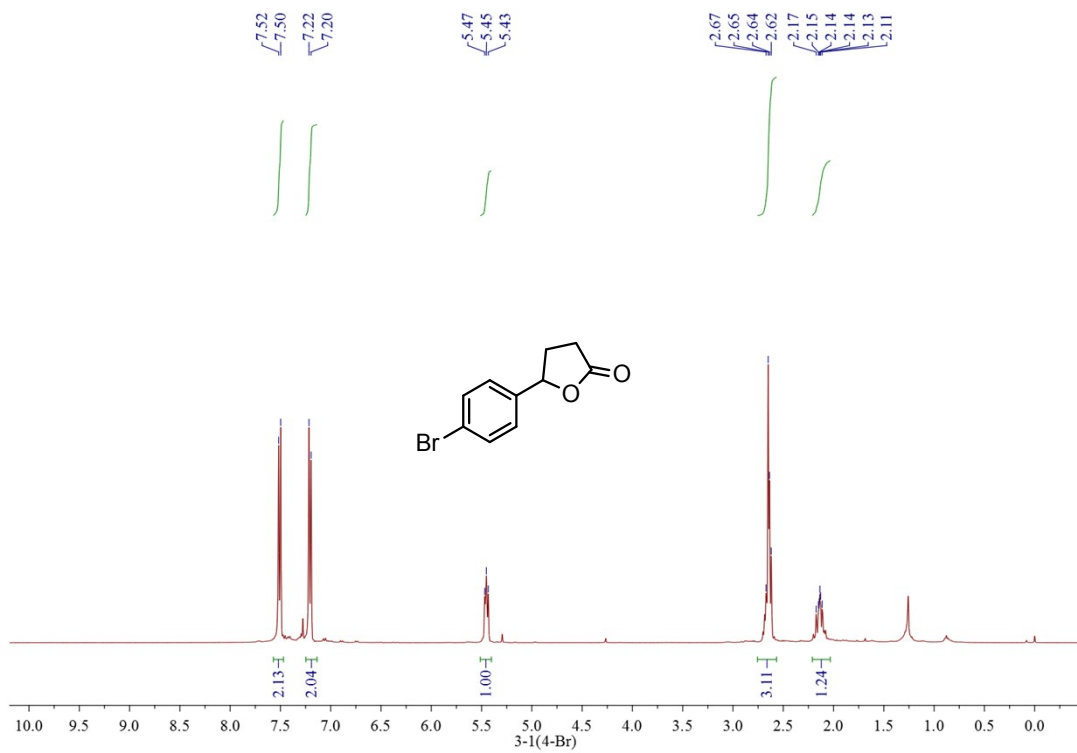

$^1\text{H}$  NMR of **2g**

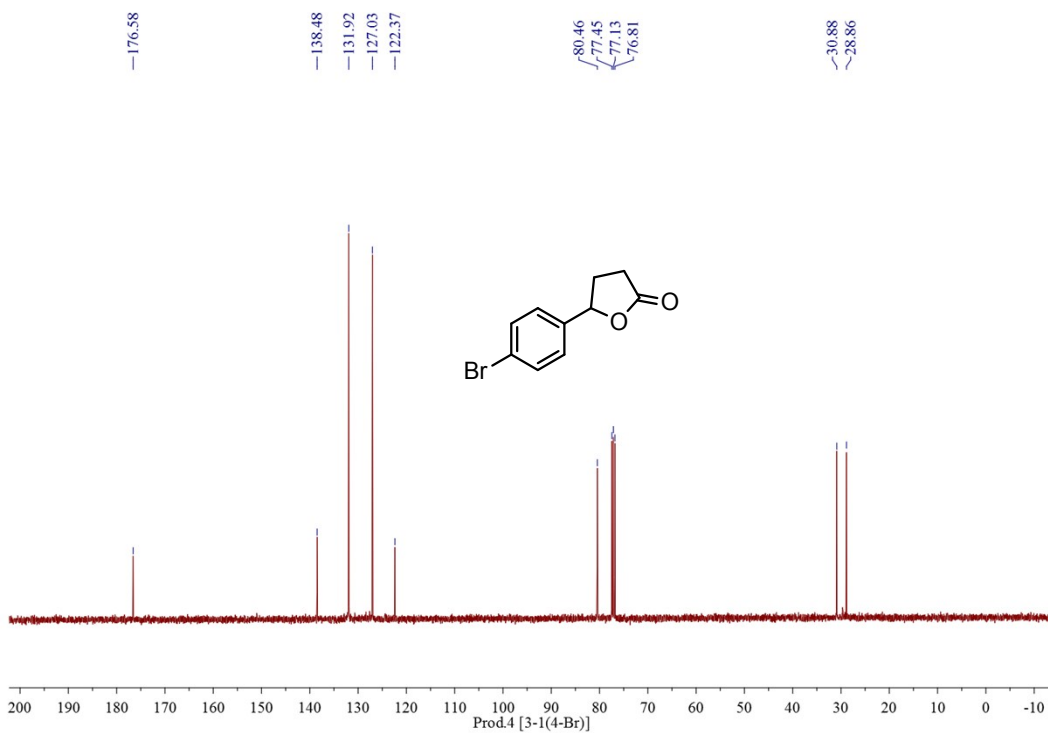

$^{13}\text{C}$  NMR of **2g**



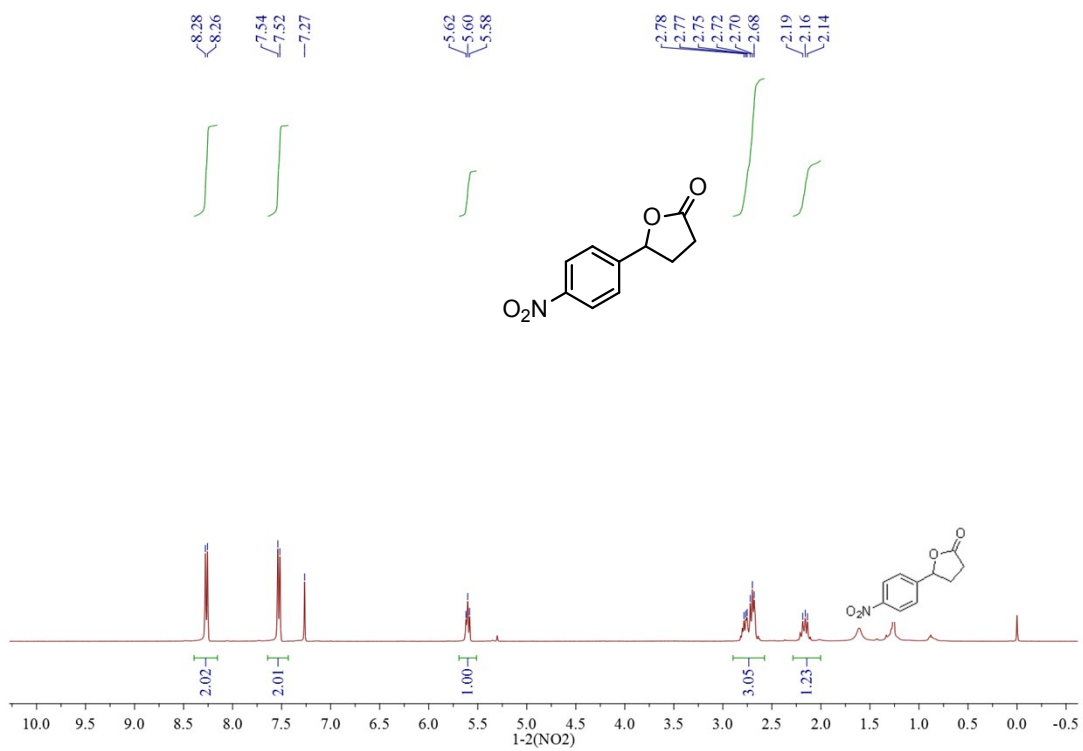

$^1\text{H NMR}$  of **2h**

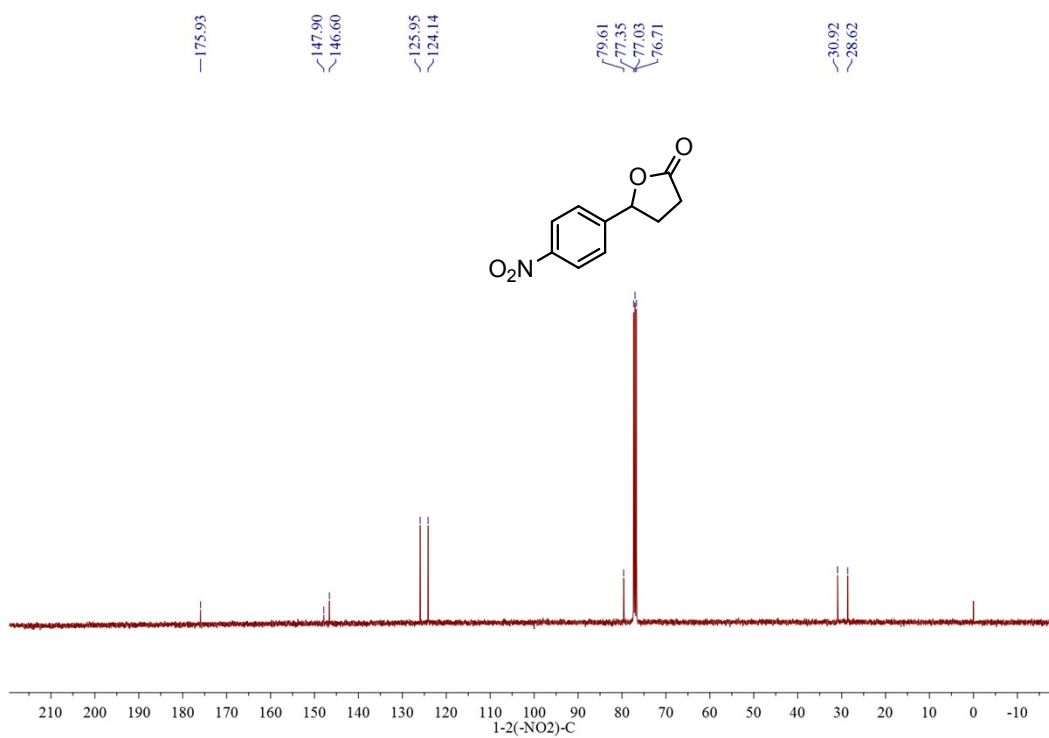

$^{13}\text{C NMR}$  of **2h**

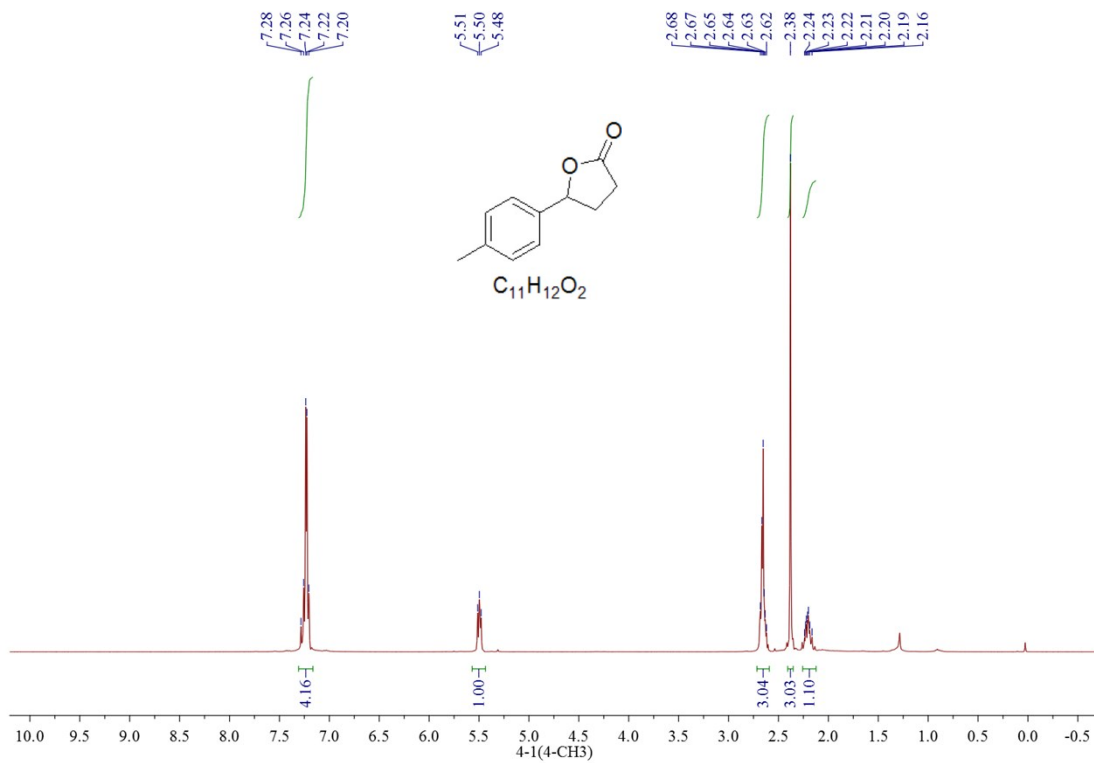

$^1H$  NMR of **2i**

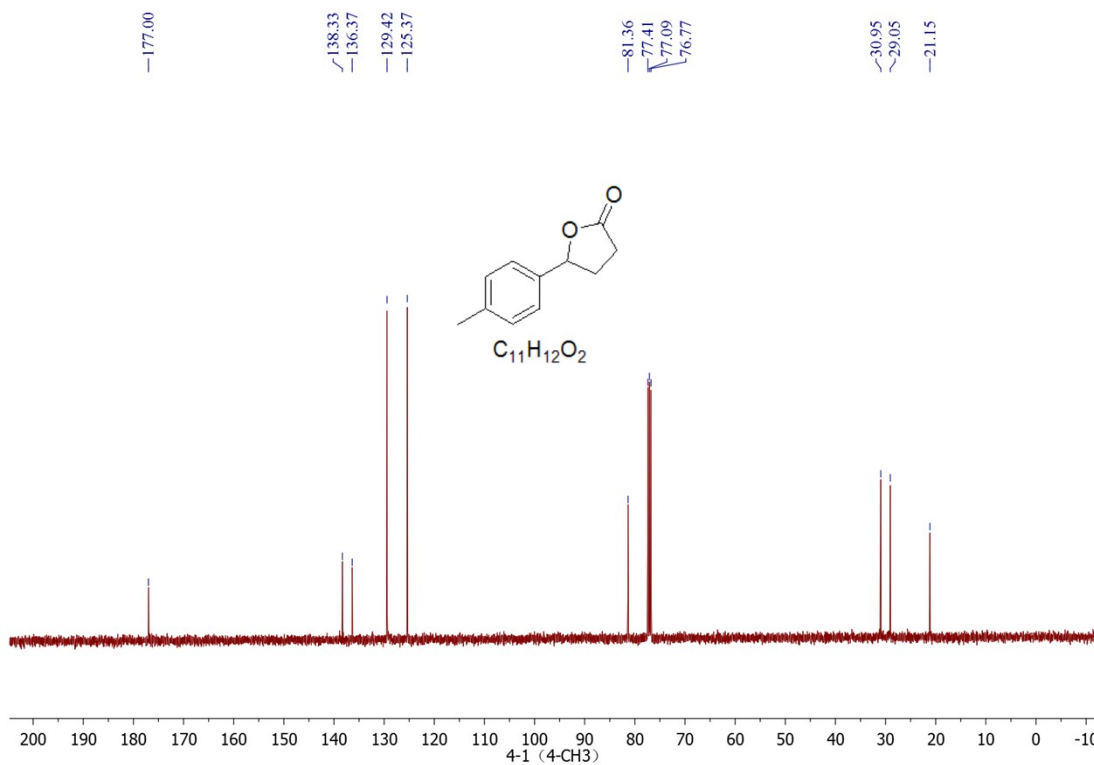

$^{13}C$  NMR of **2i**

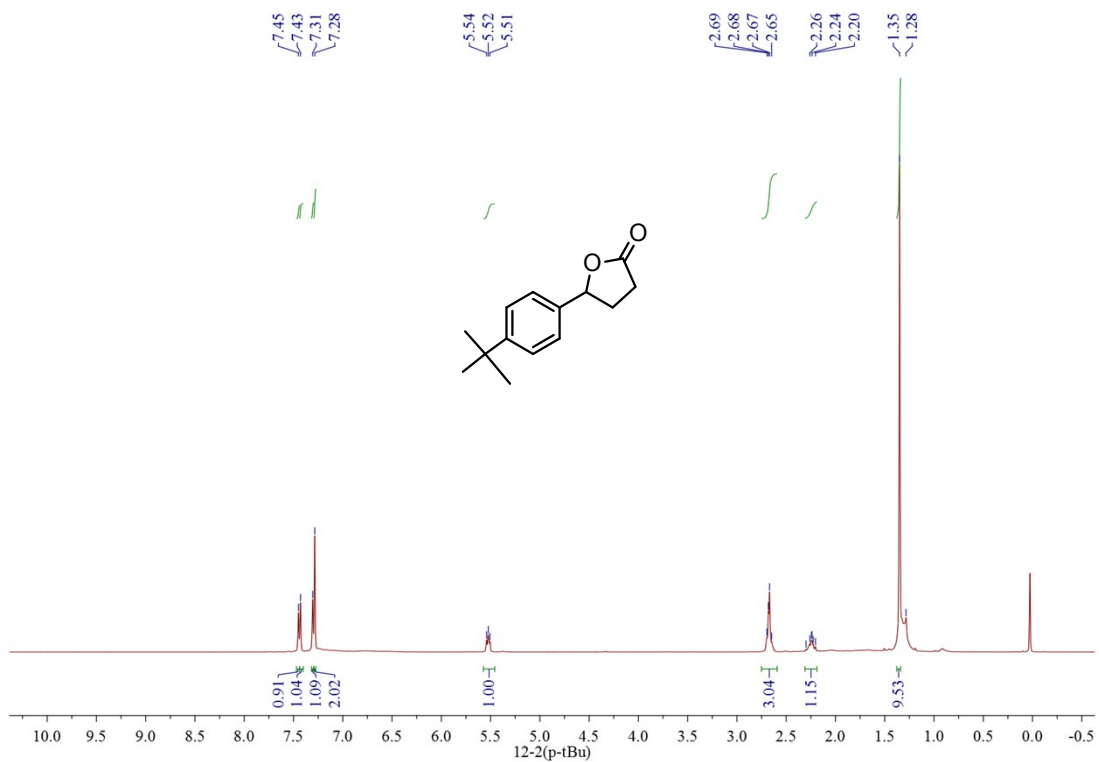

$^1\text{H}$  NMR of **2j**

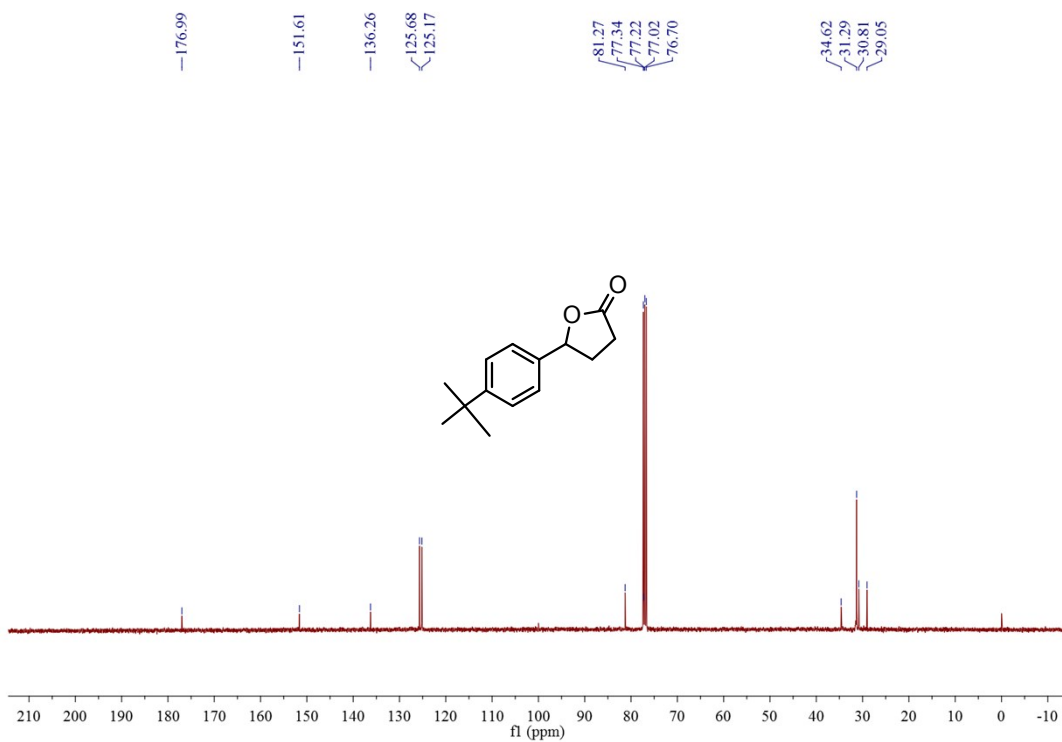

$^{13}\text{C}$  NMR of **2j**

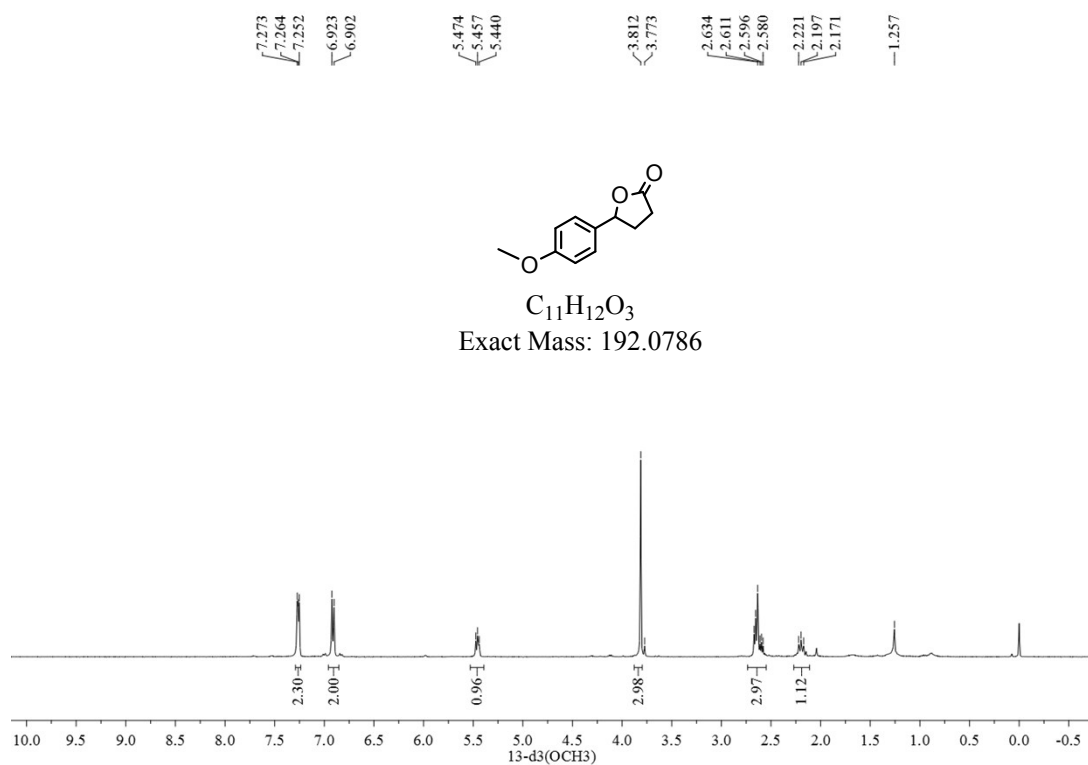

<sup>1</sup>H NMR of **2k**

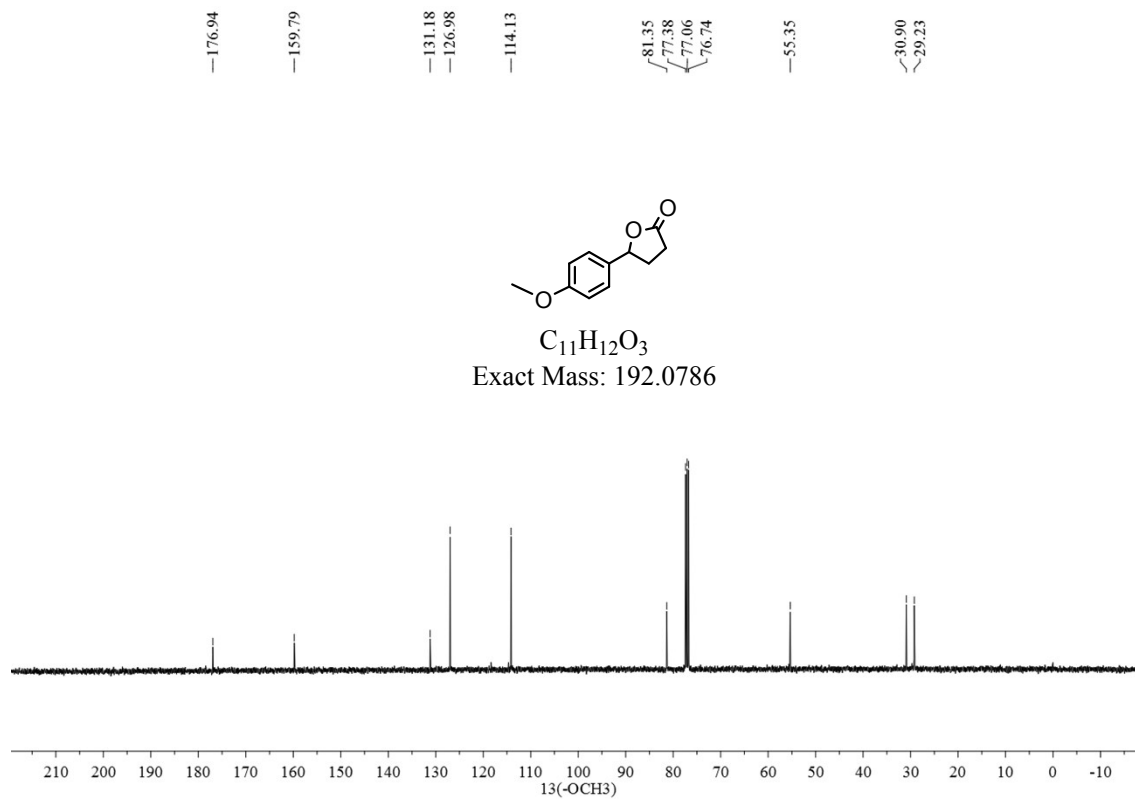

<sup>13</sup>C NMR of **2k**

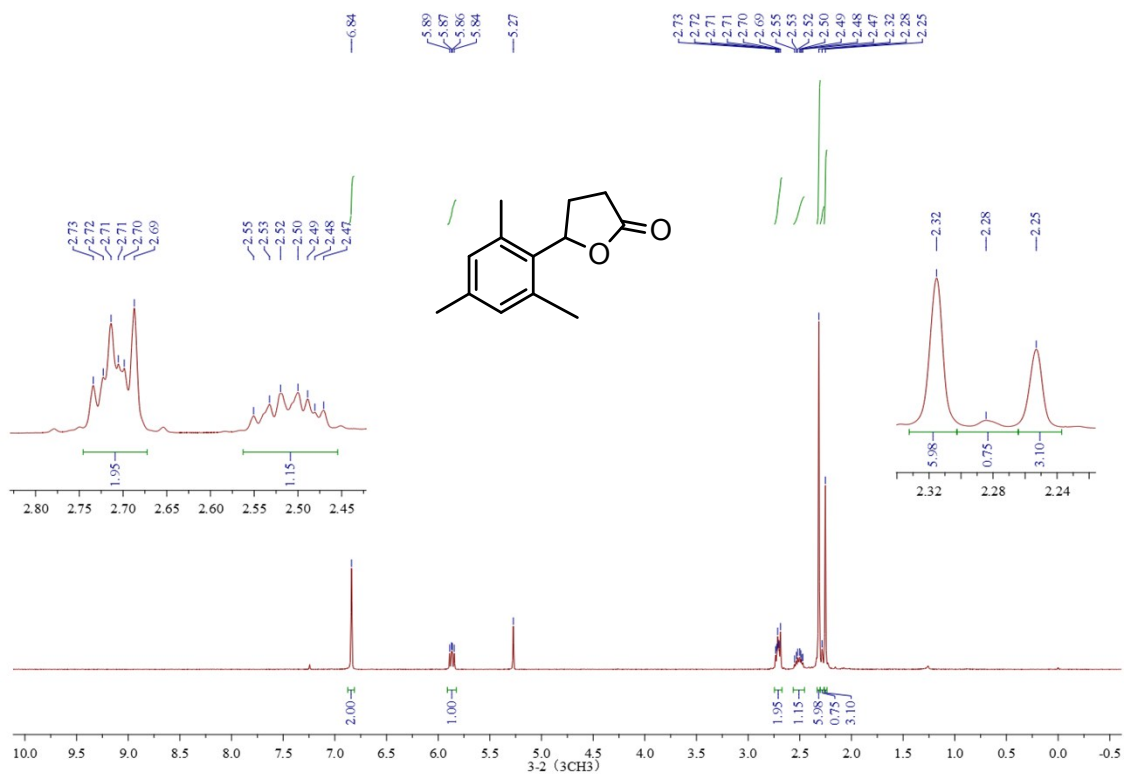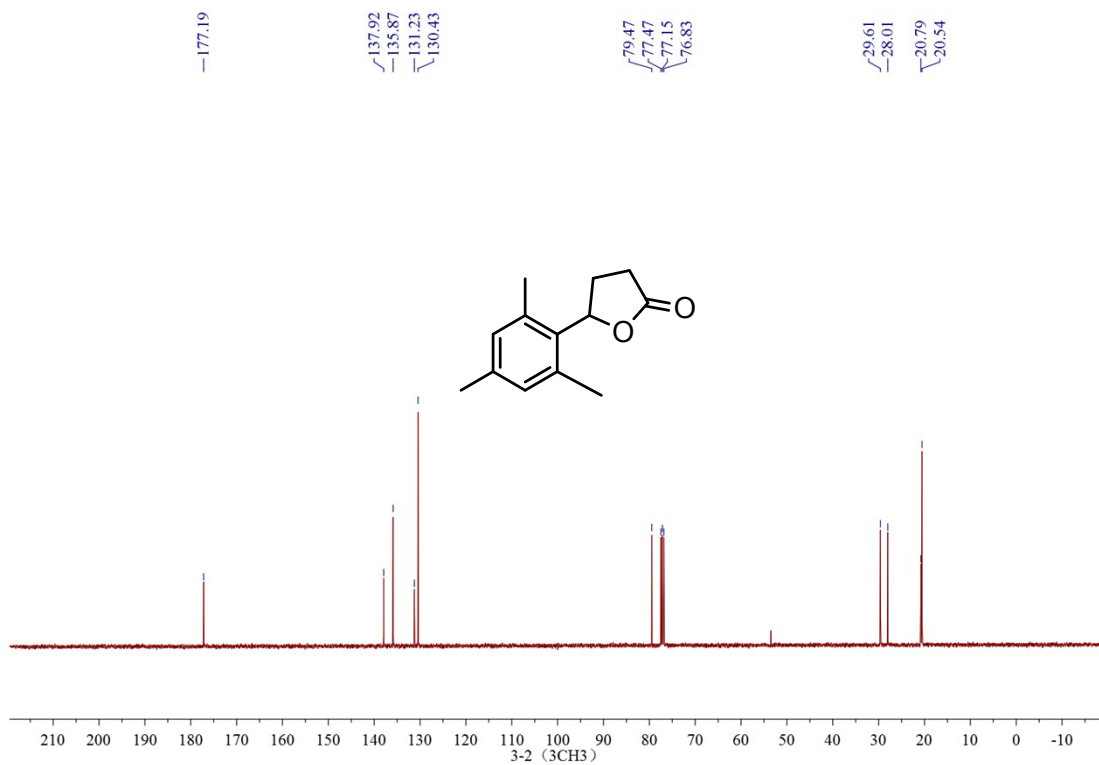

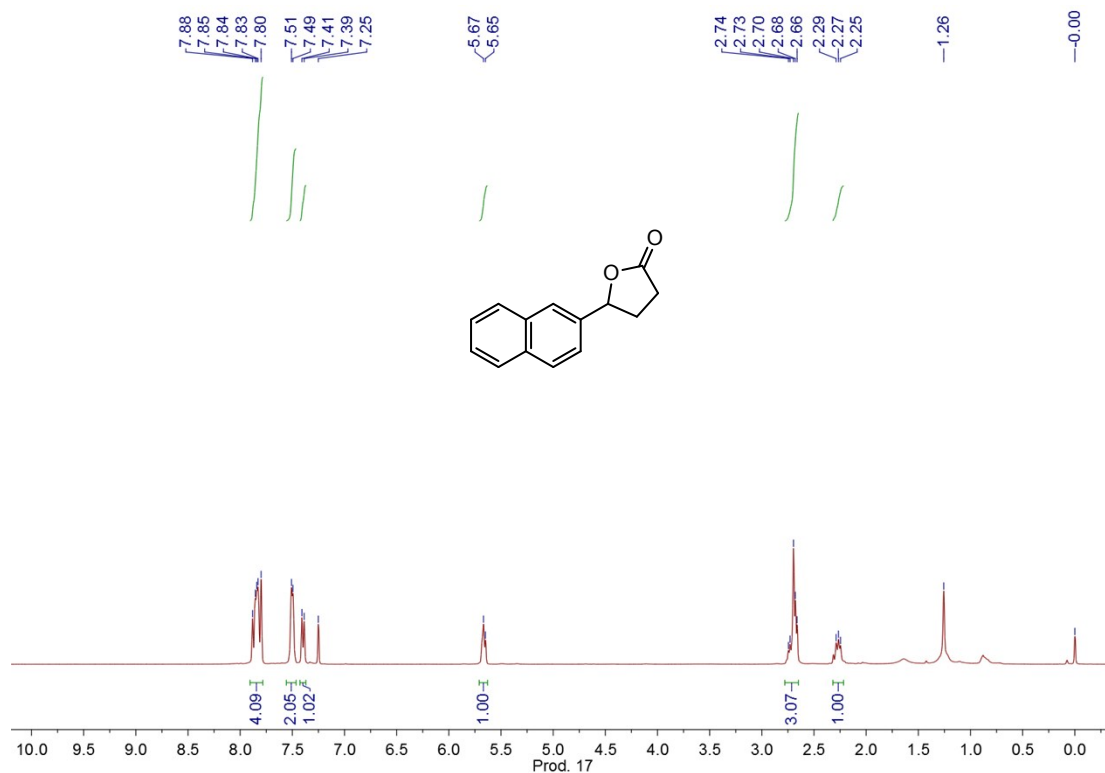

$^1\text{H NMR}$  of 2m

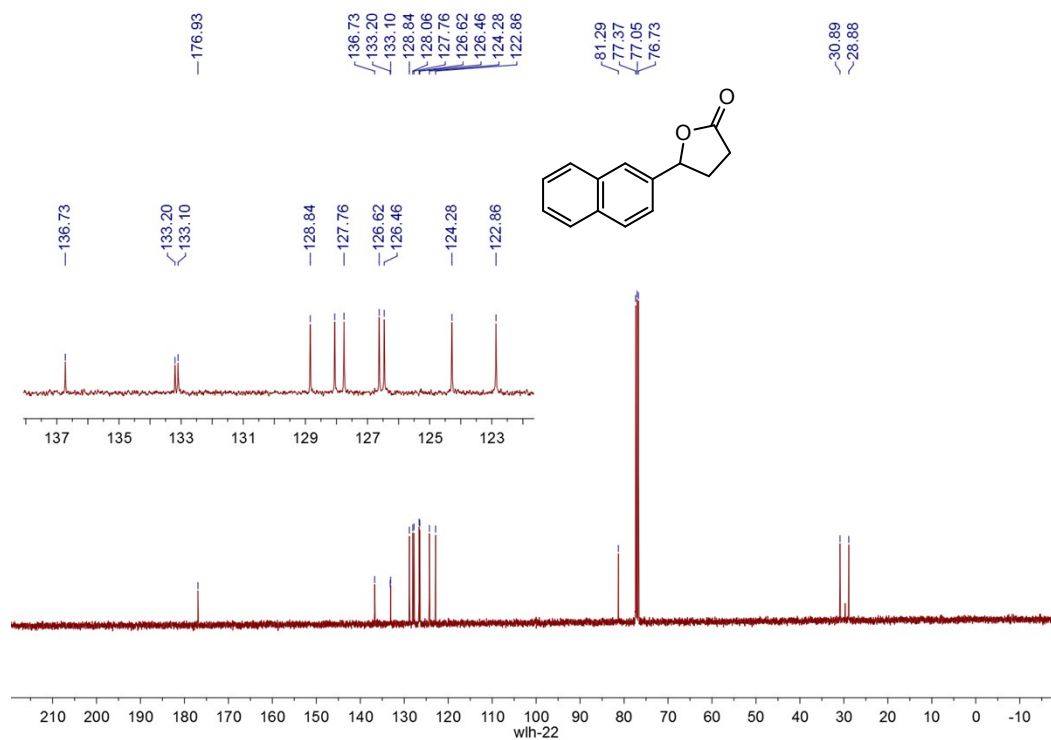

$^{13}\text{C NMR}$  of 2m

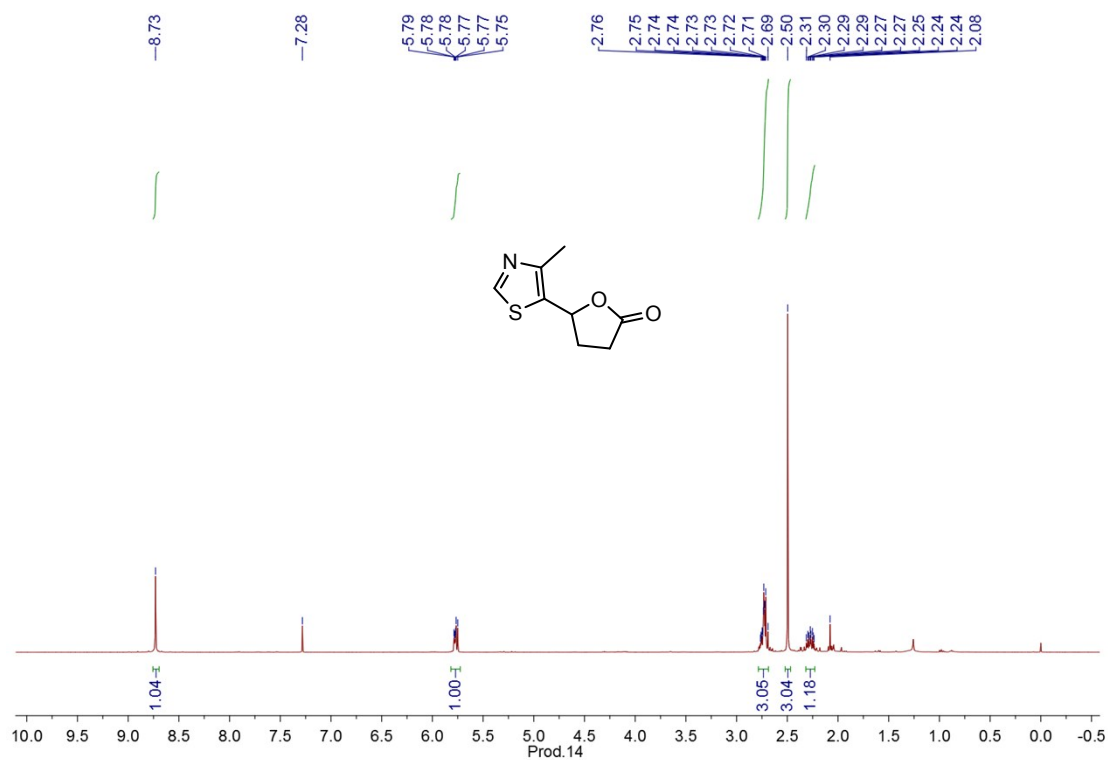

<sup>1</sup>H NMR of **2n**

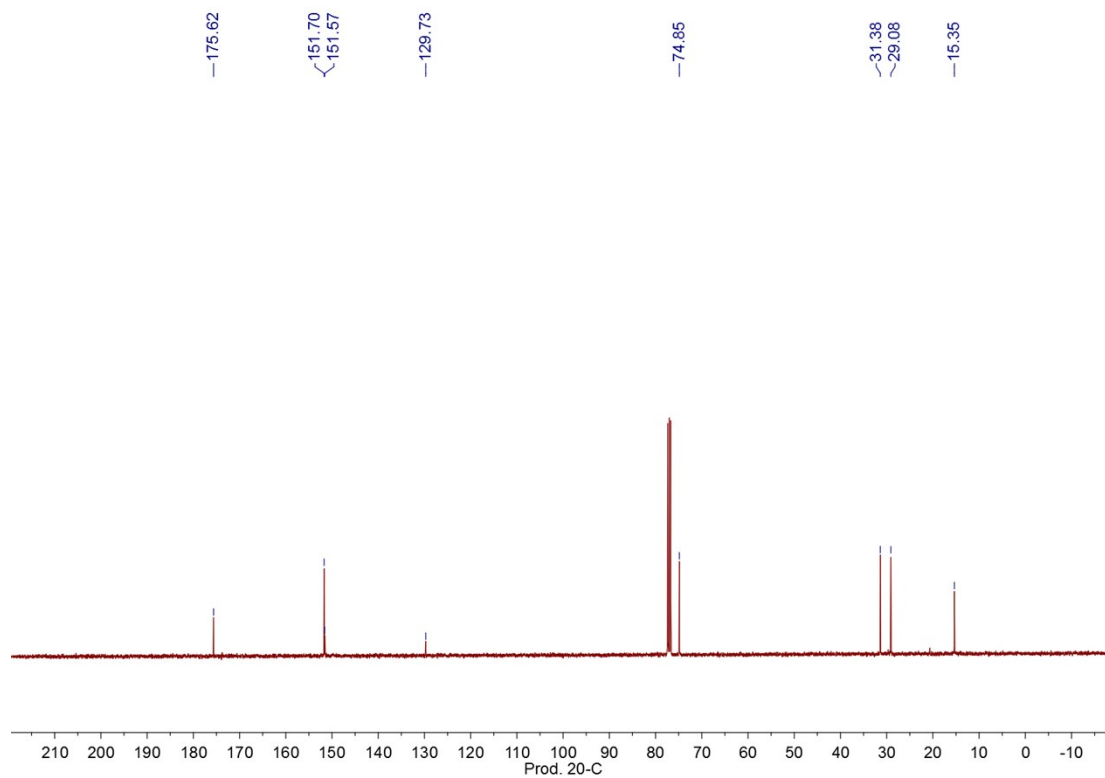

<sup>13</sup>C NMR of **2n**

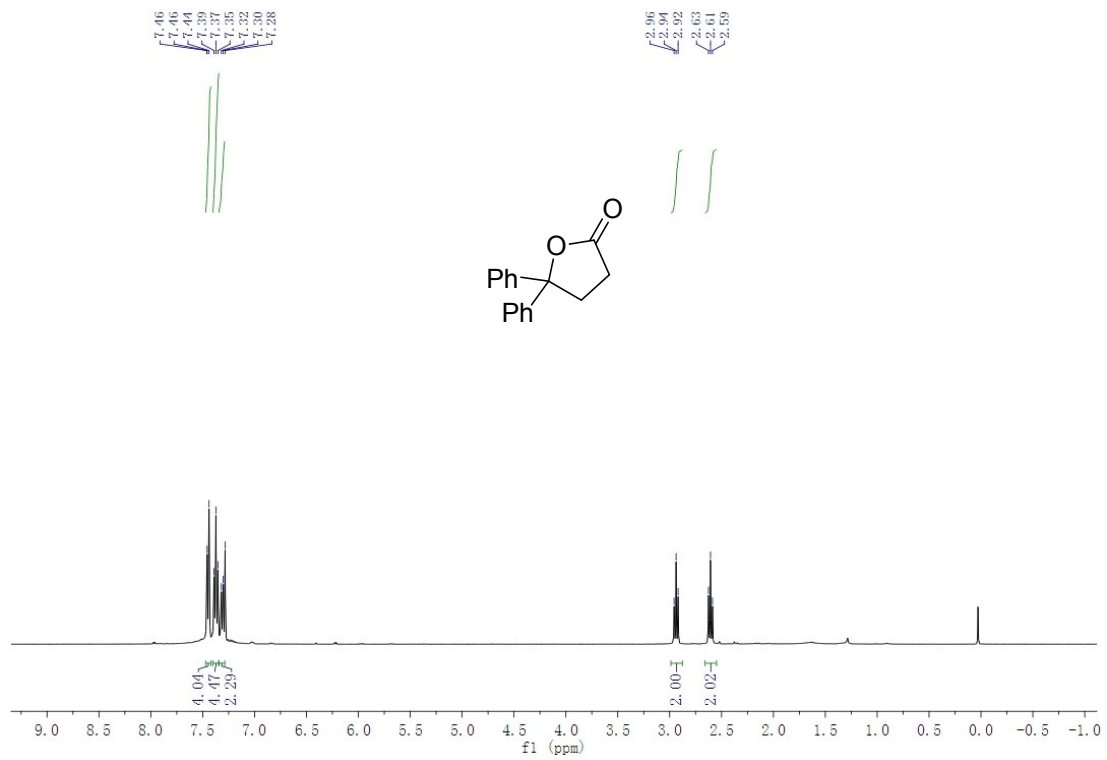

<sup>1</sup>H NMR of **2o**

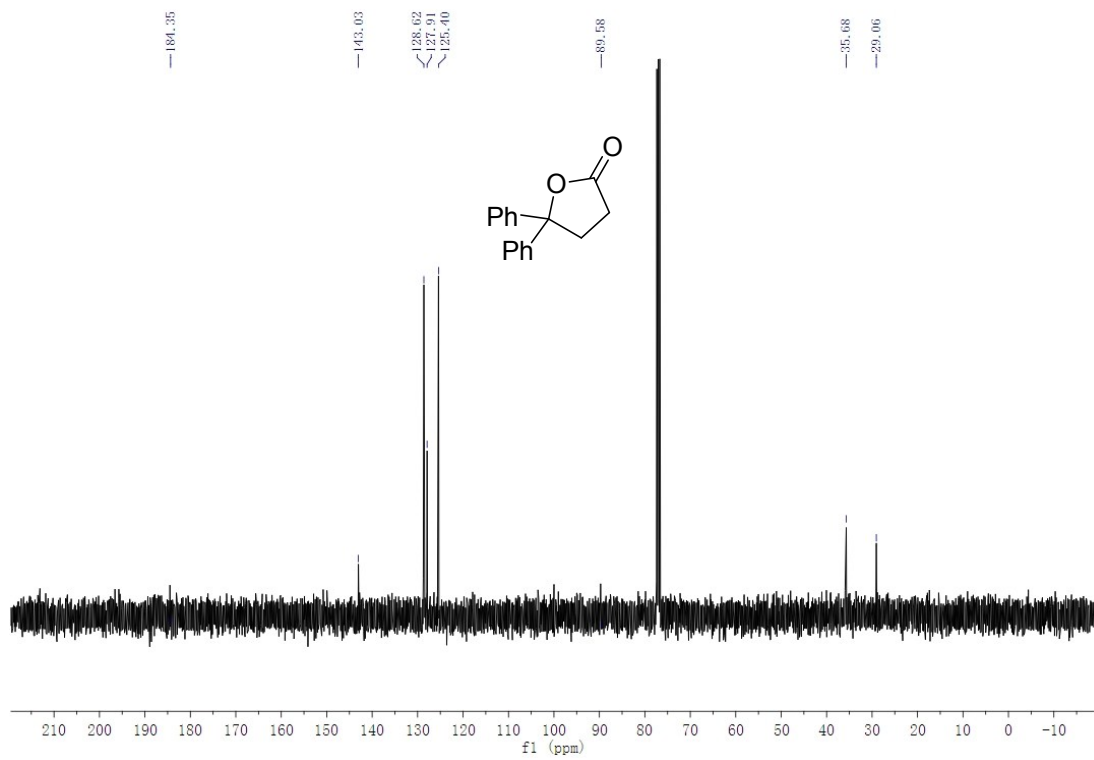

<sup>13</sup>C NMR of **2o**



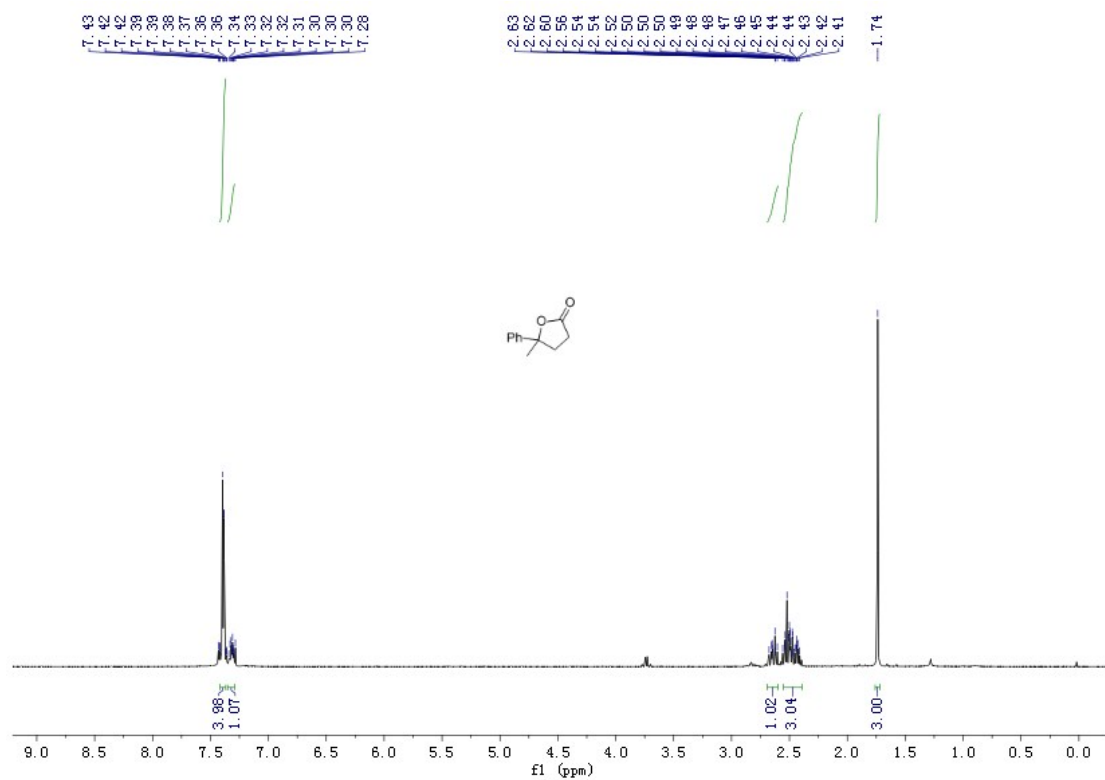

<sup>1</sup>H NMR of 2p

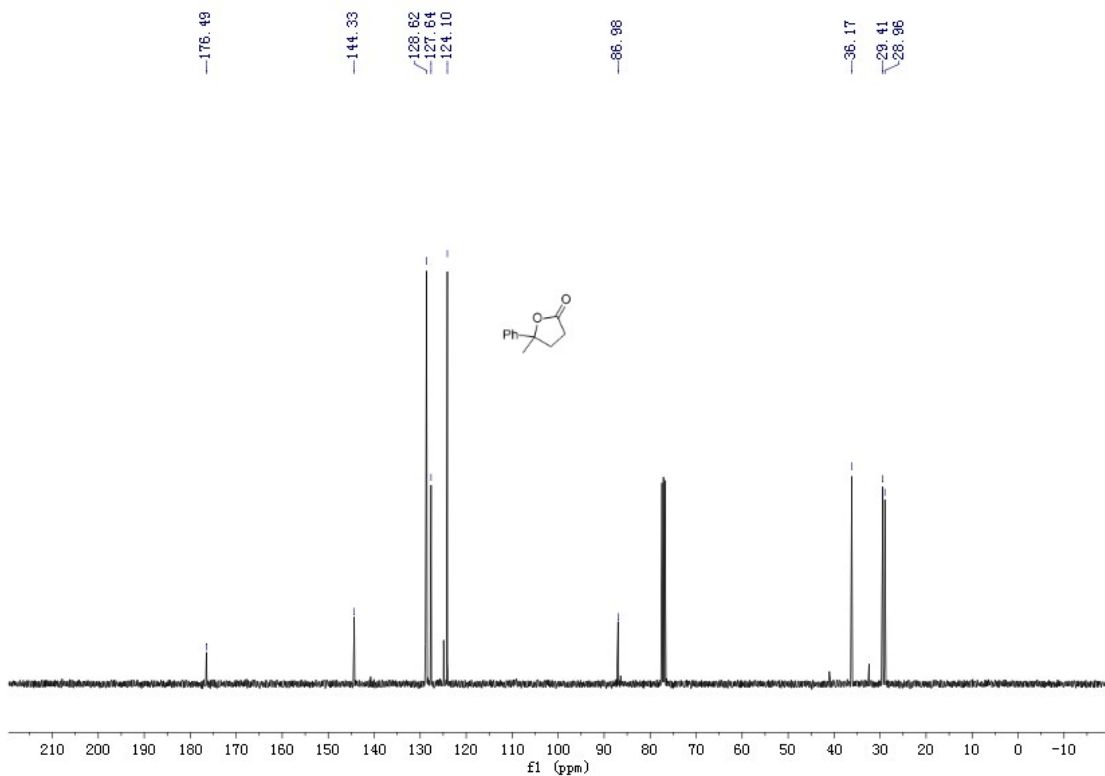

<sup>13</sup>C NMR of 2p

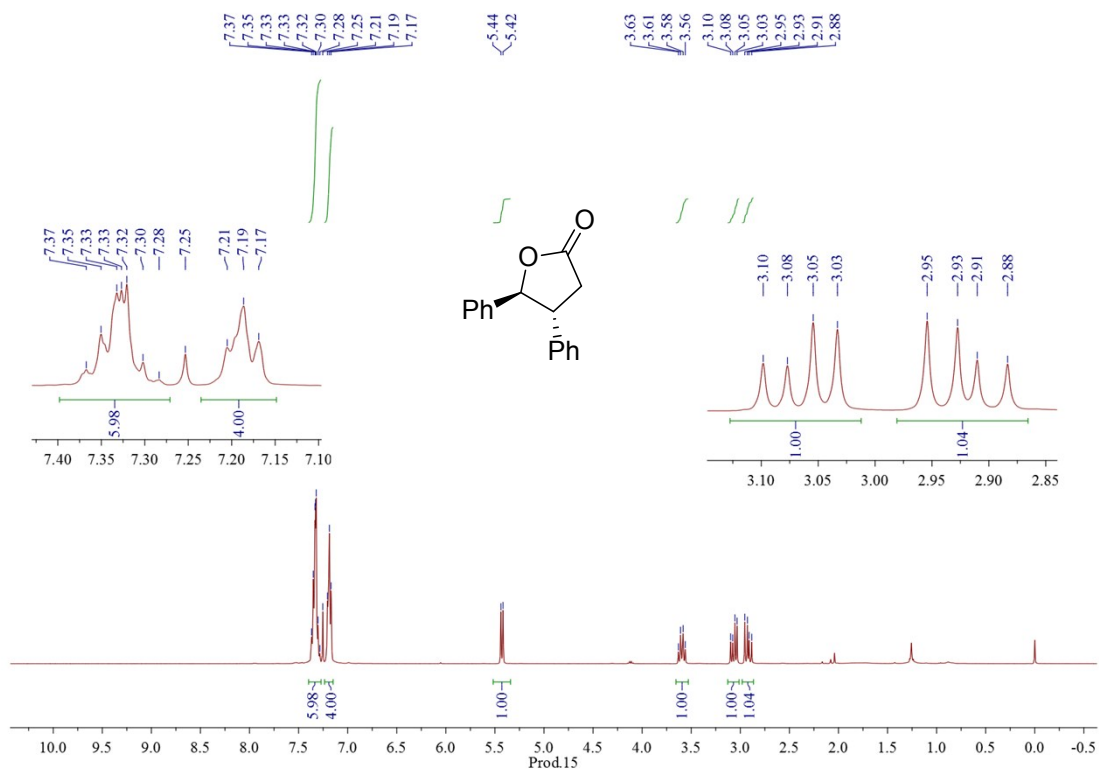

**<sup>1</sup>H NMR of 2q-1**

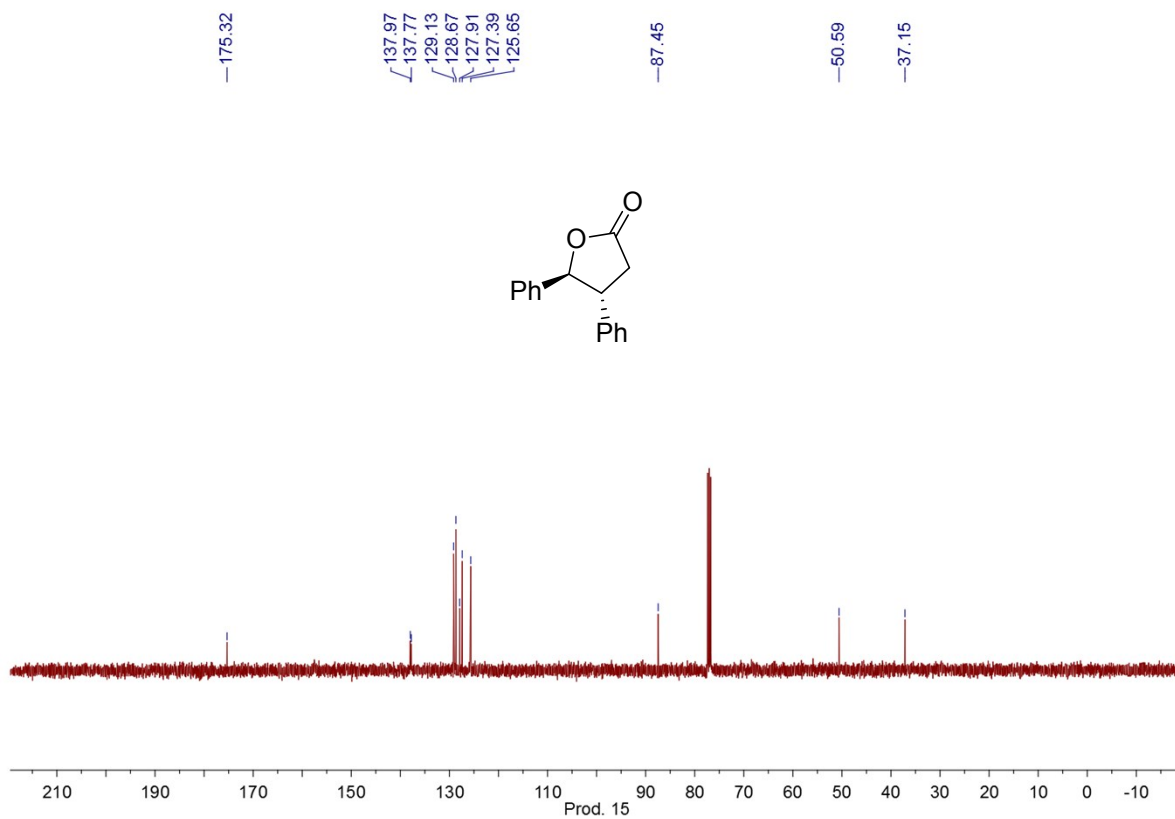

**<sup>13</sup>C NMR of 2q-1**

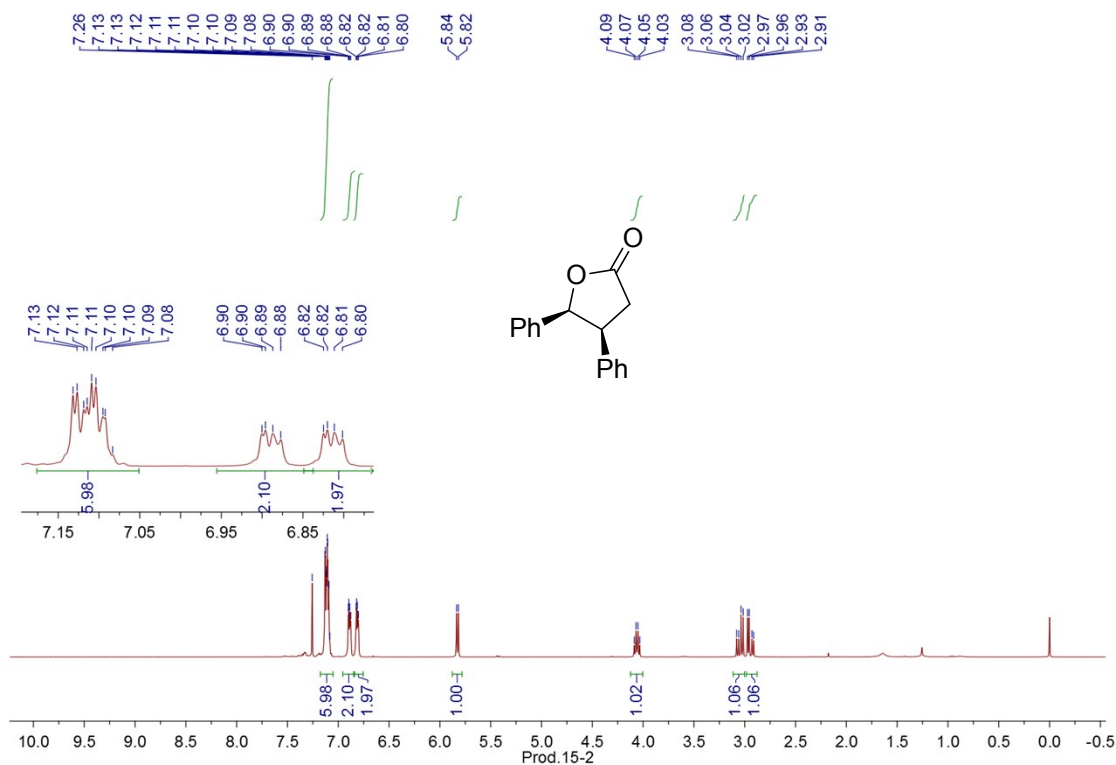

**<sup>1</sup>H NMR of 2q-2**

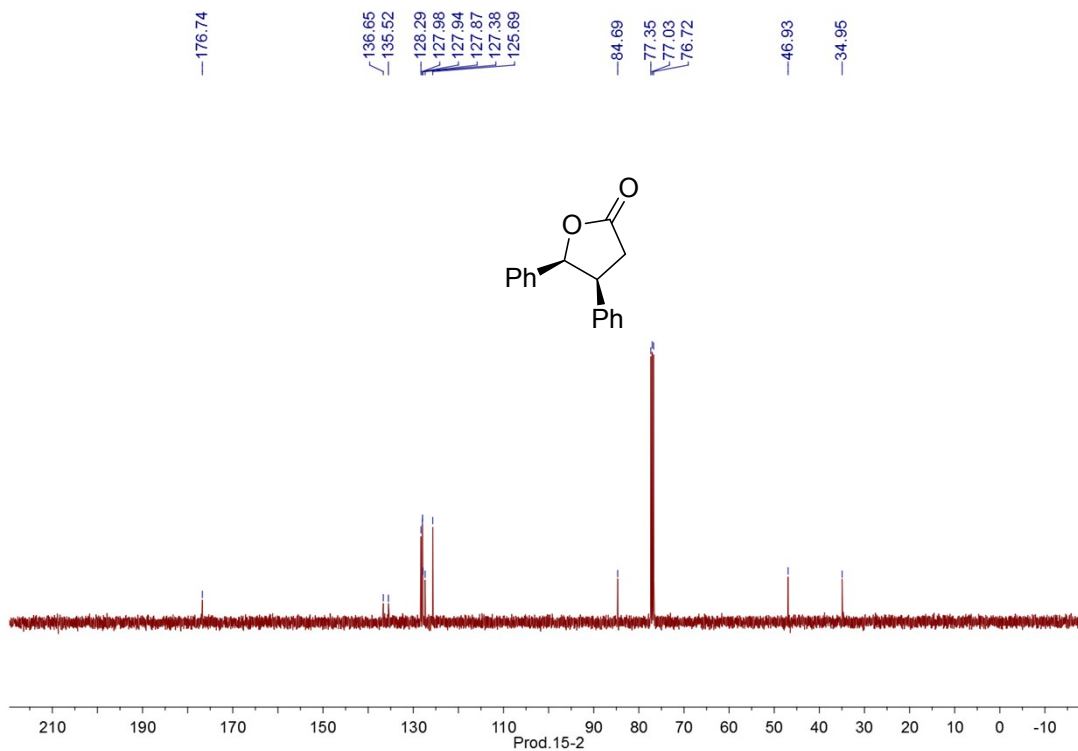

**<sup>13</sup>C NMR of 2q-2**

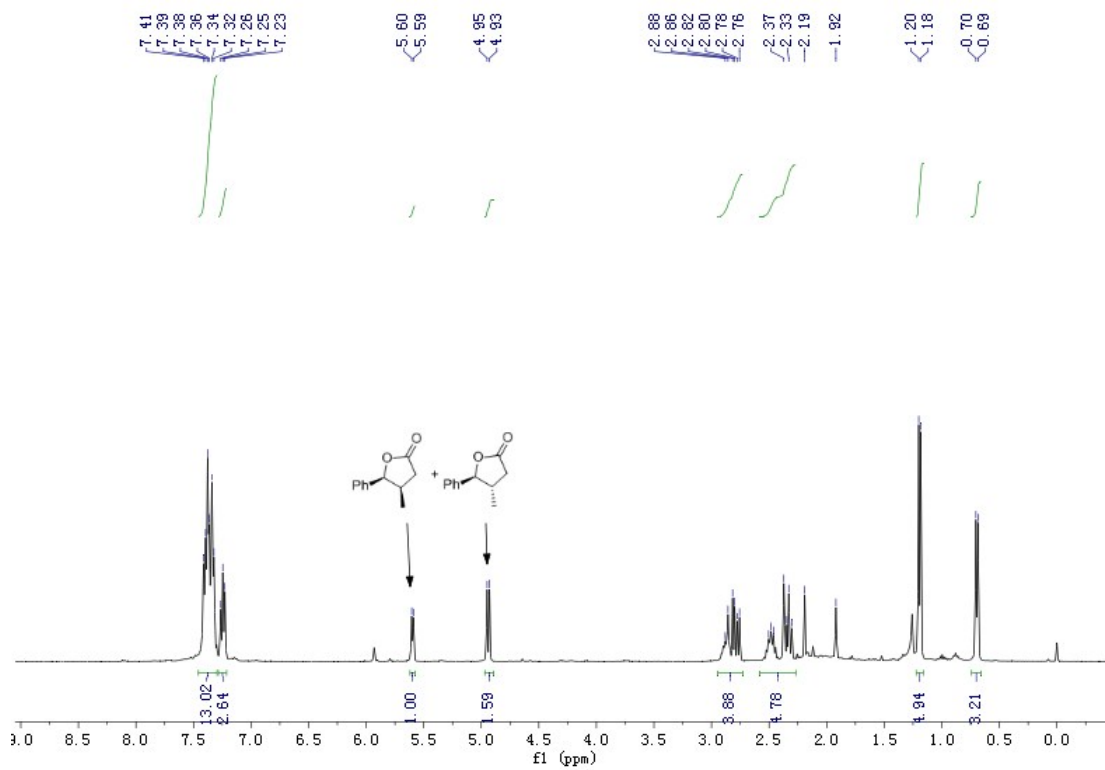

<sup>1</sup>H NMR of **2r**

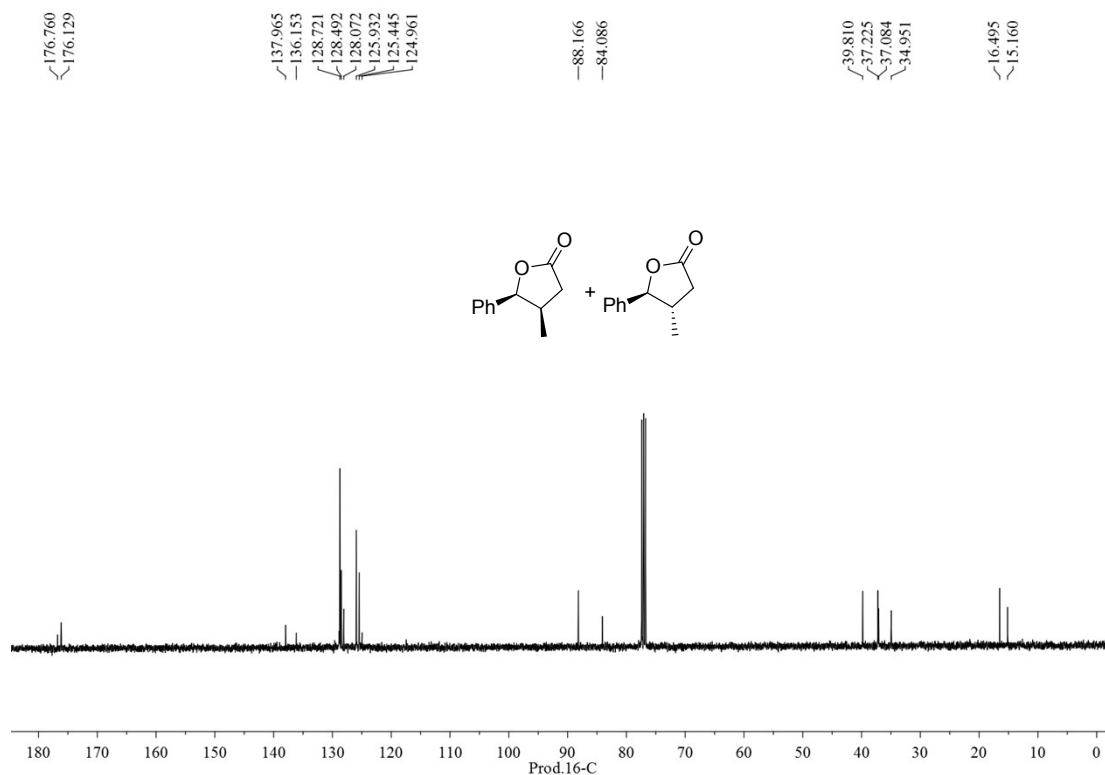

<sup>13</sup>C NMR of **2r**

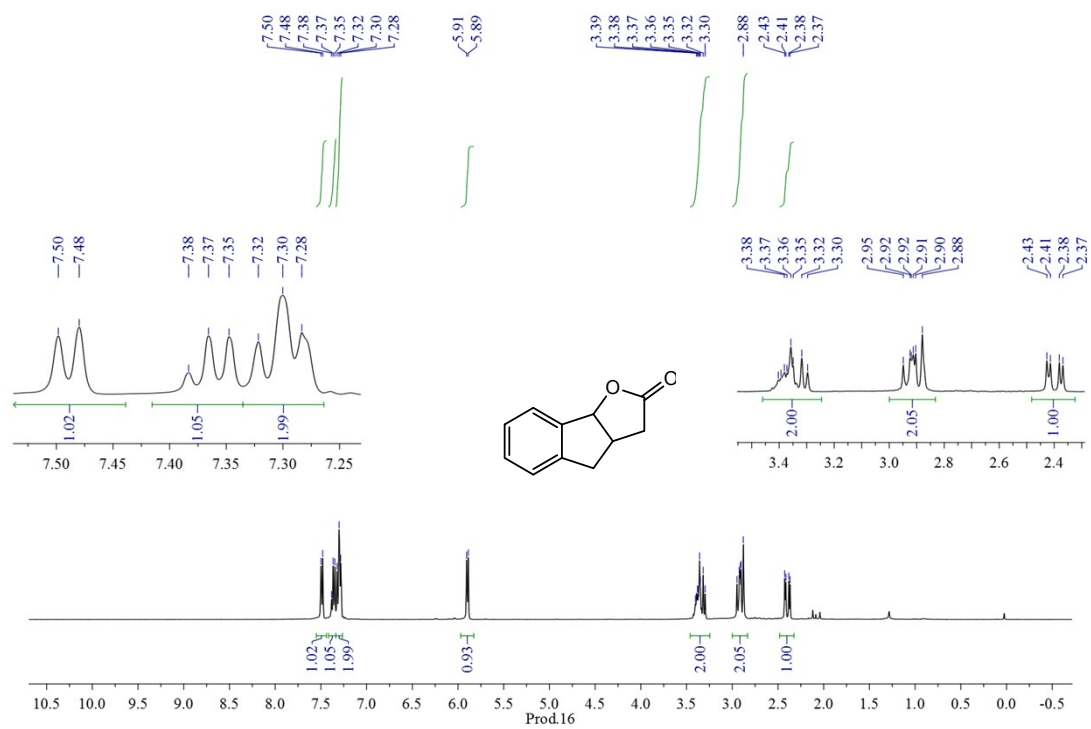

**<sup>1</sup>H NMR of 2s**

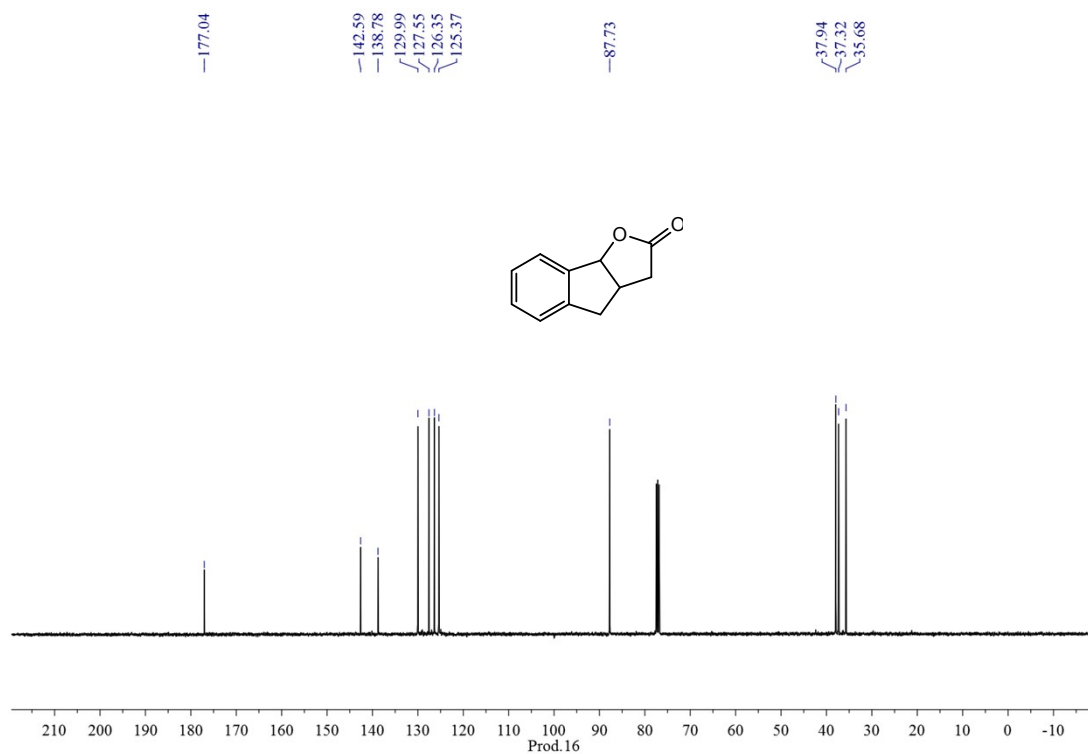

**<sup>13</sup>C NMR of 2s**

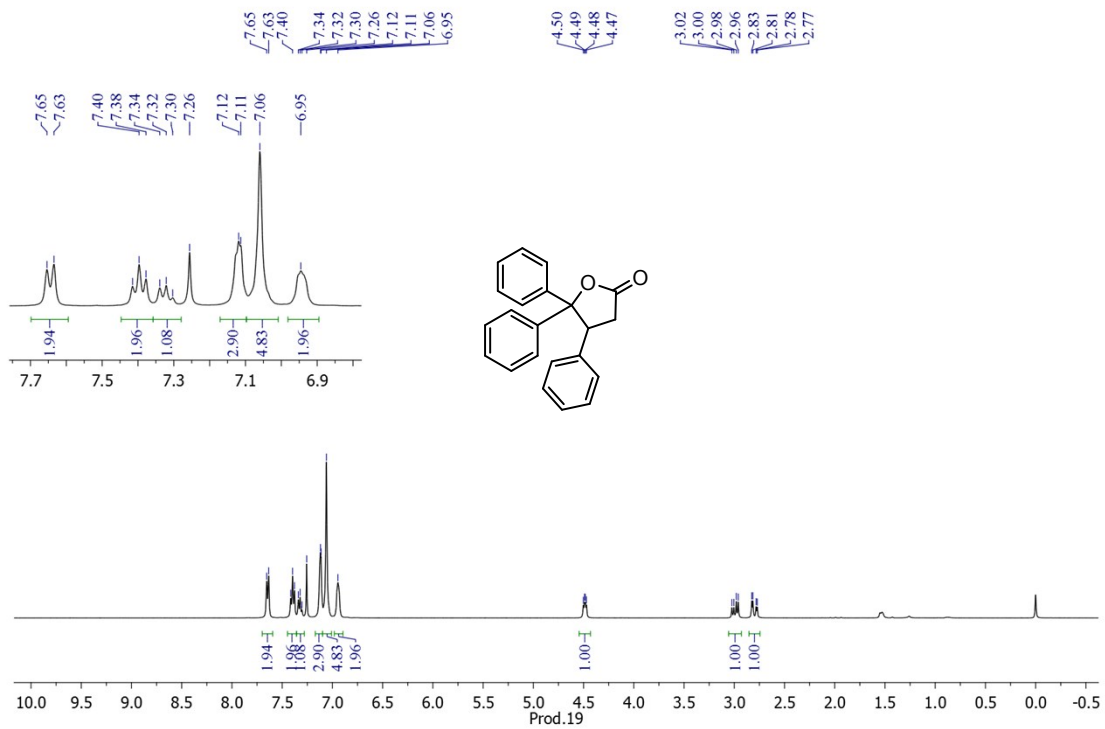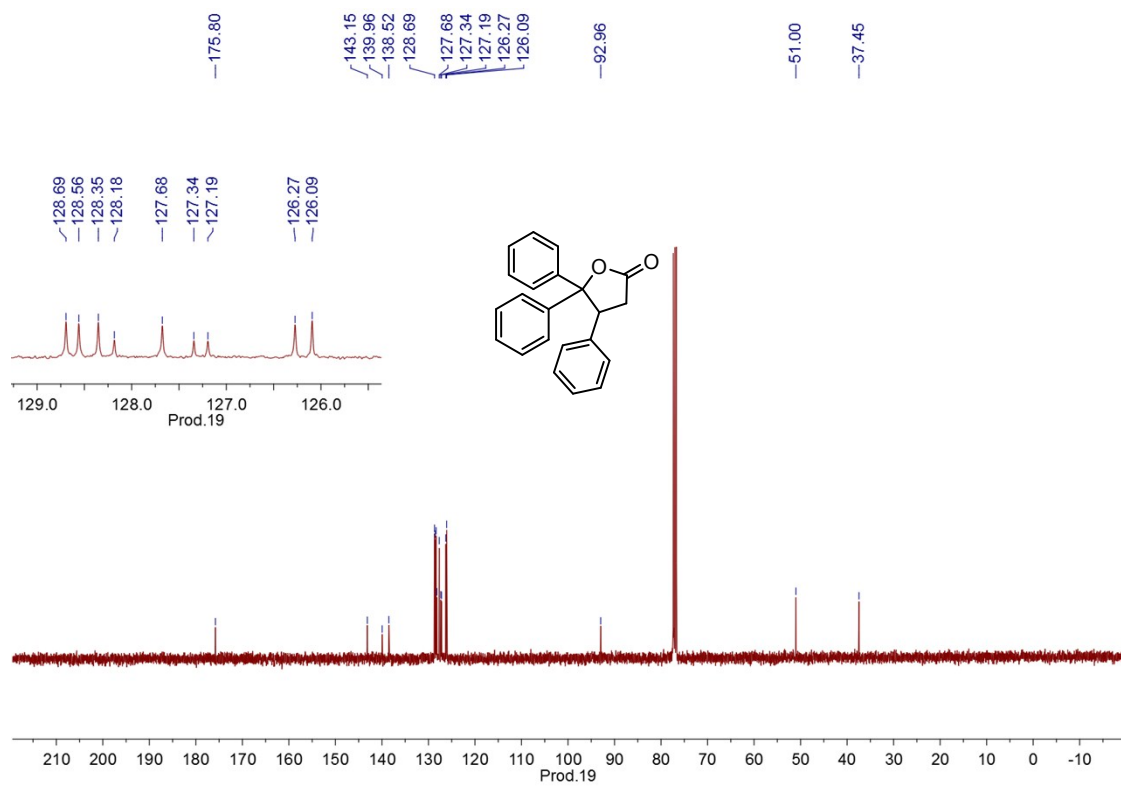

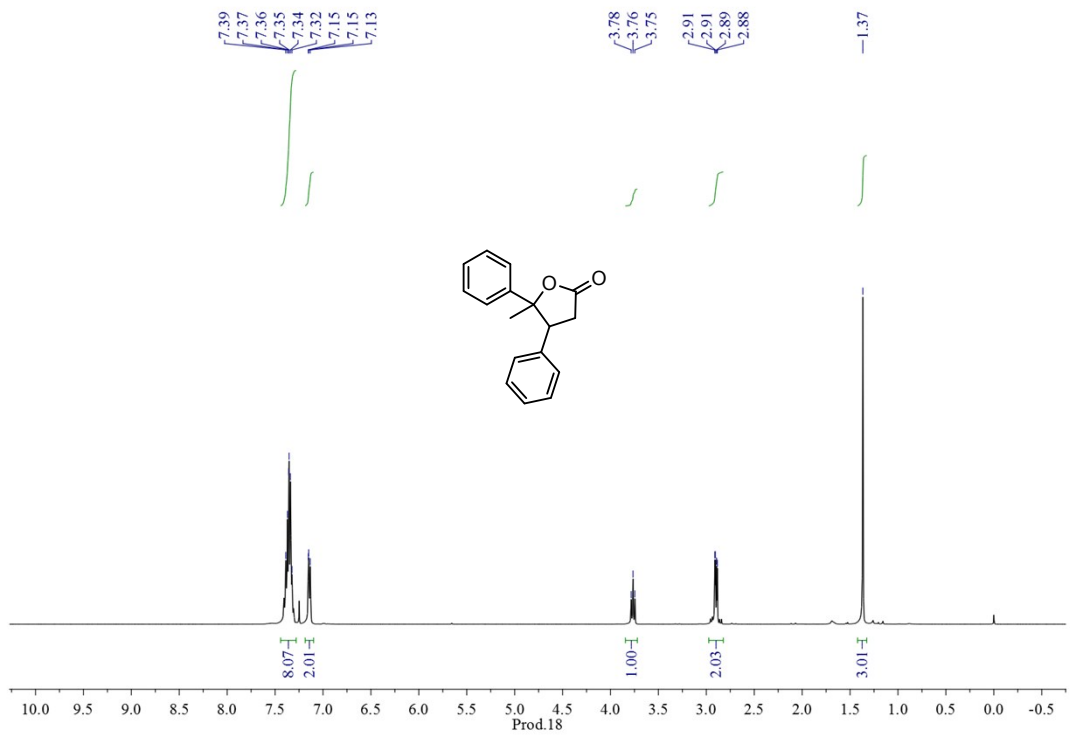

<sup>1</sup>H NMR of **2u**

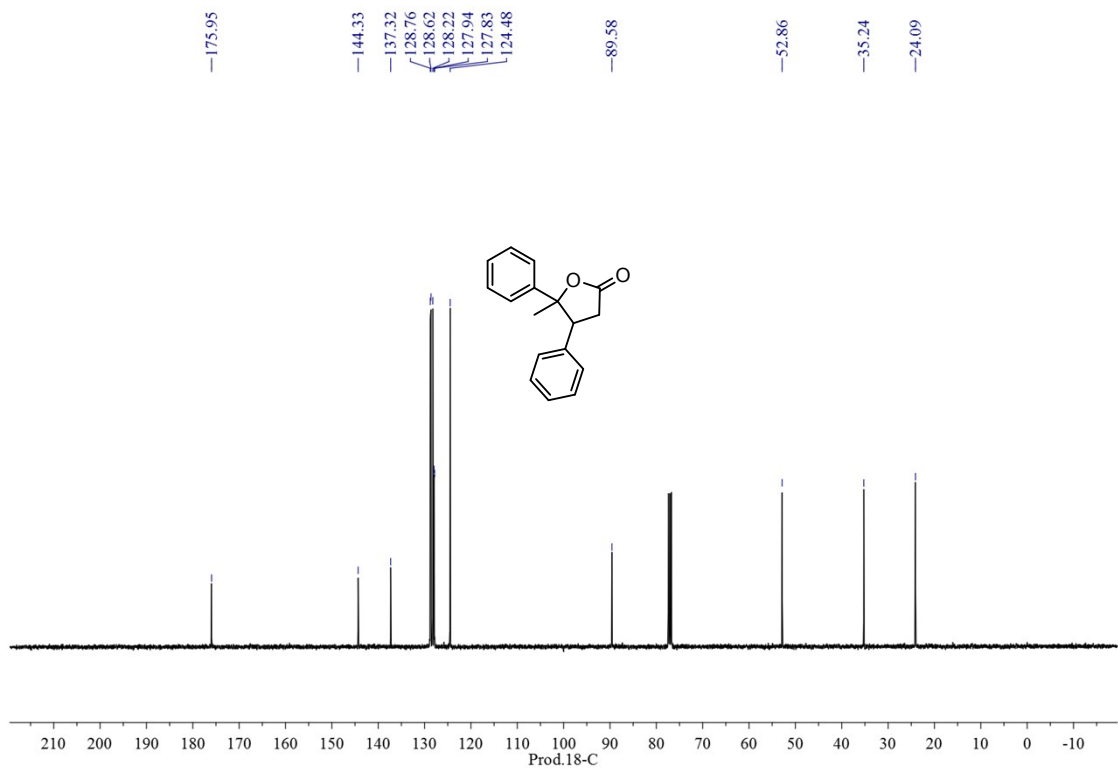

<sup>13</sup>C NMR of **2u**

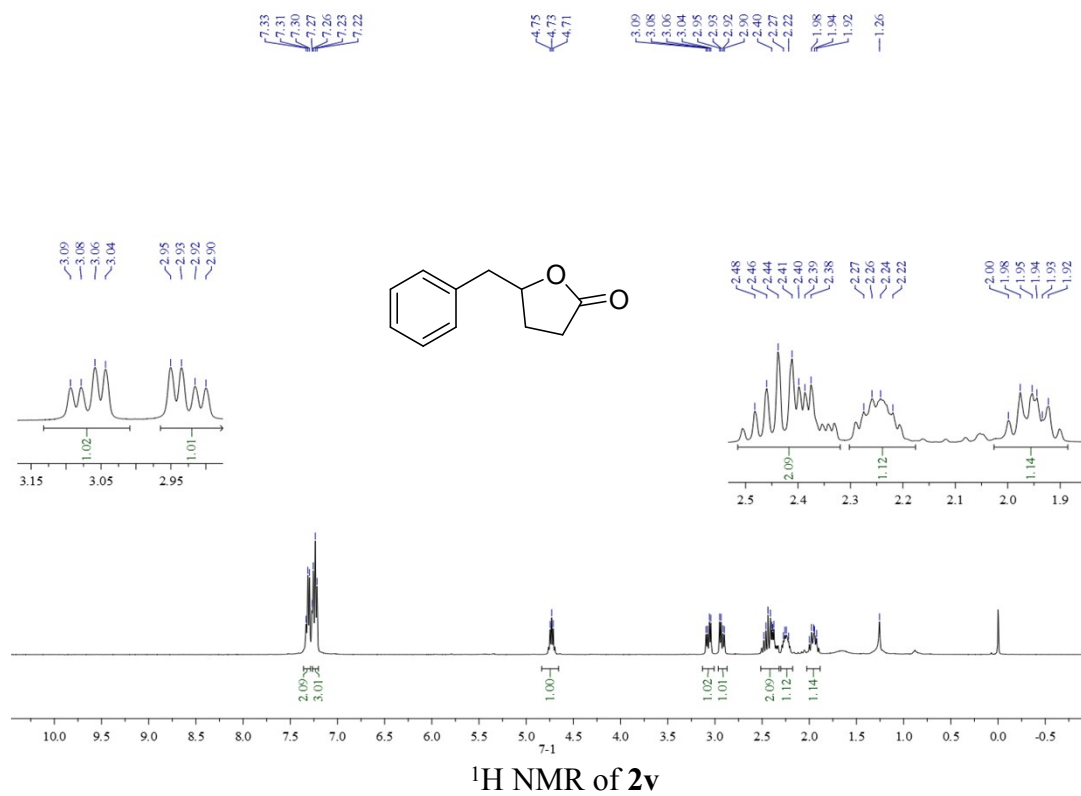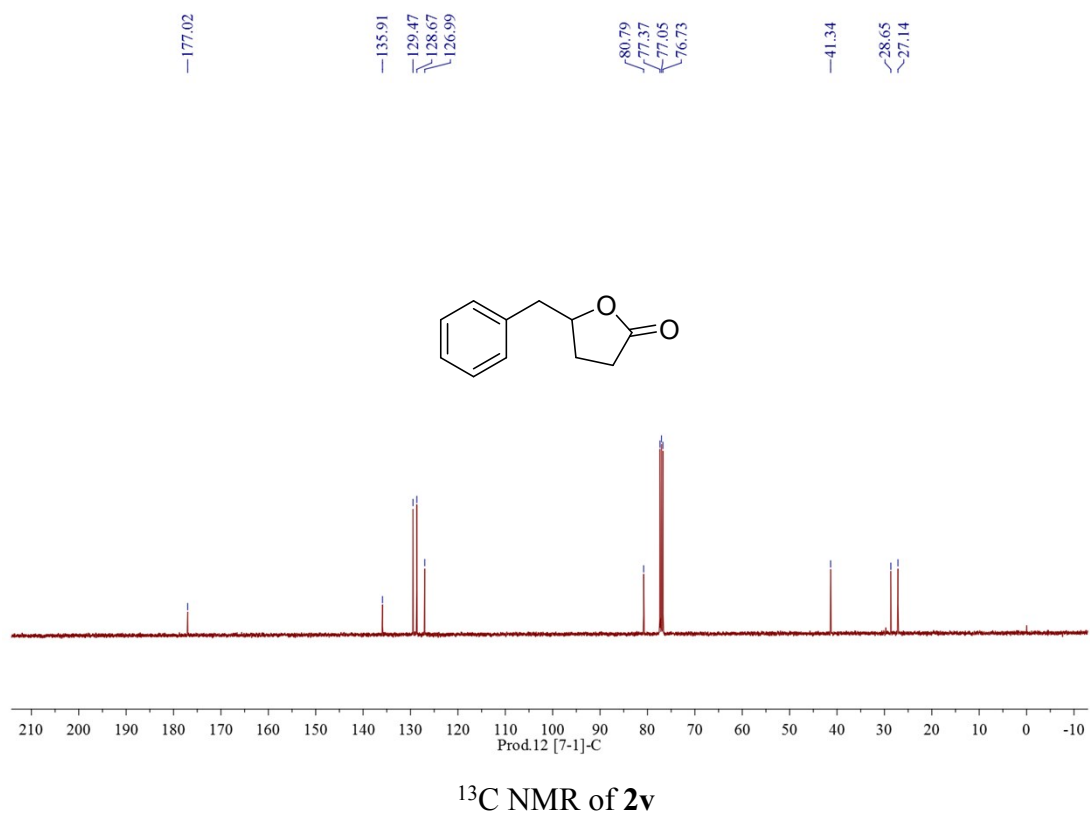



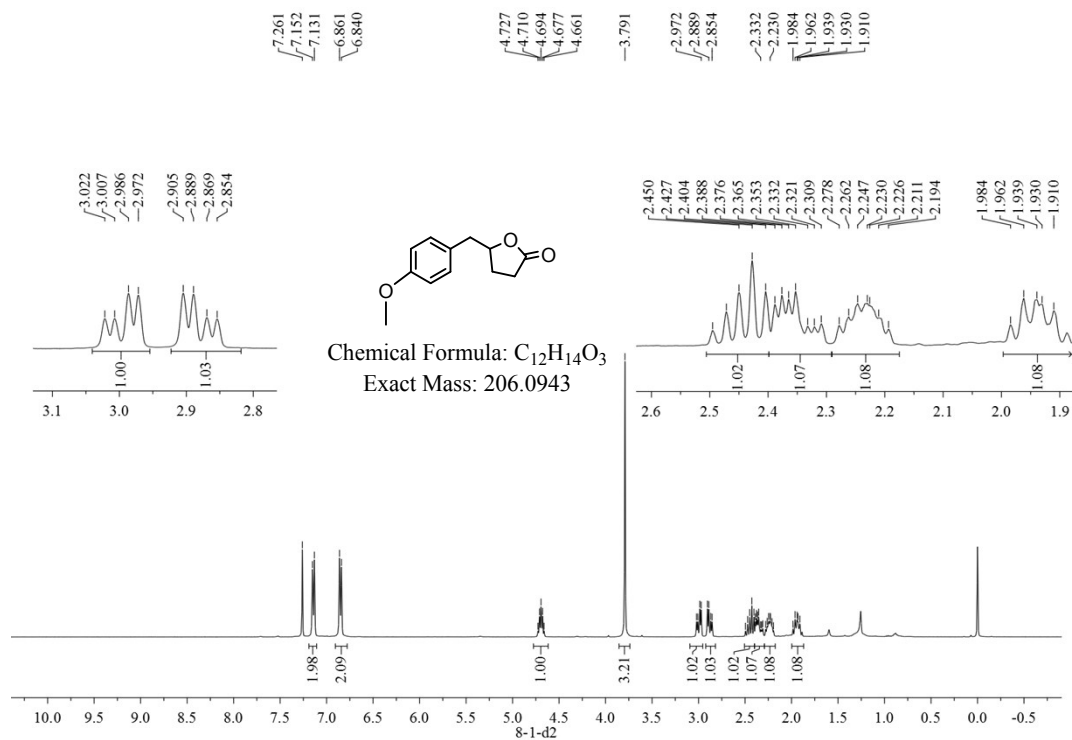

$^1H$  NMR of **2w**

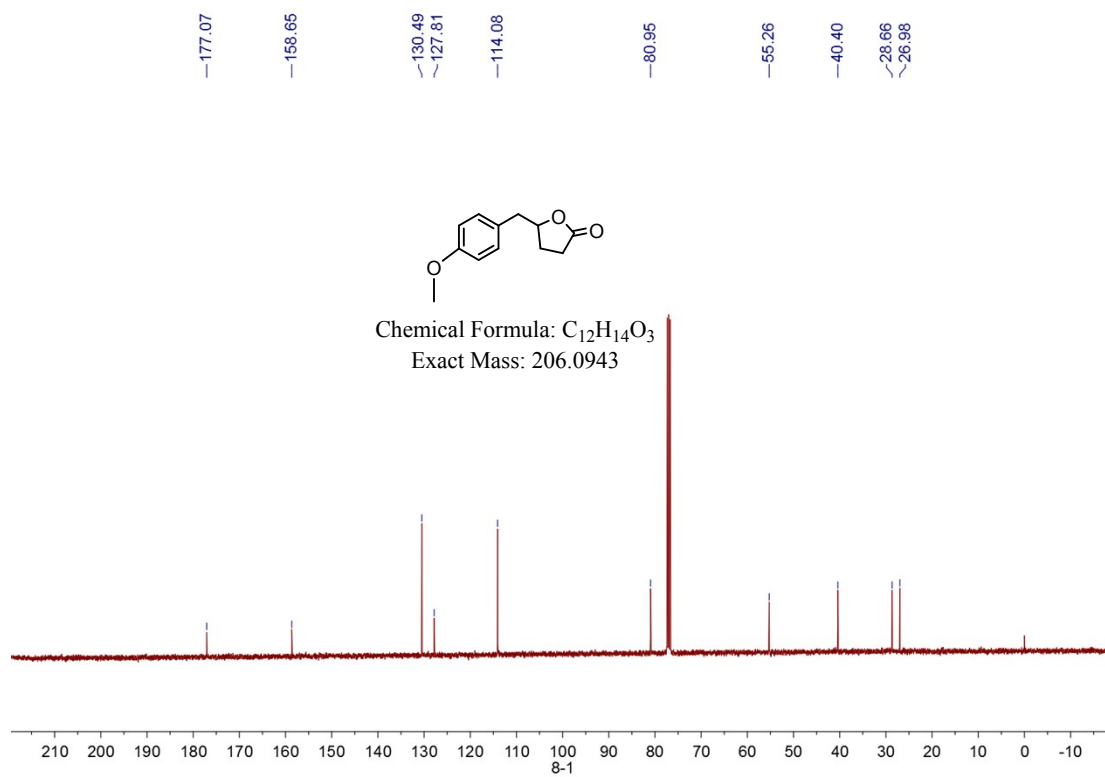

$^{13}C$  NMR of **2w**

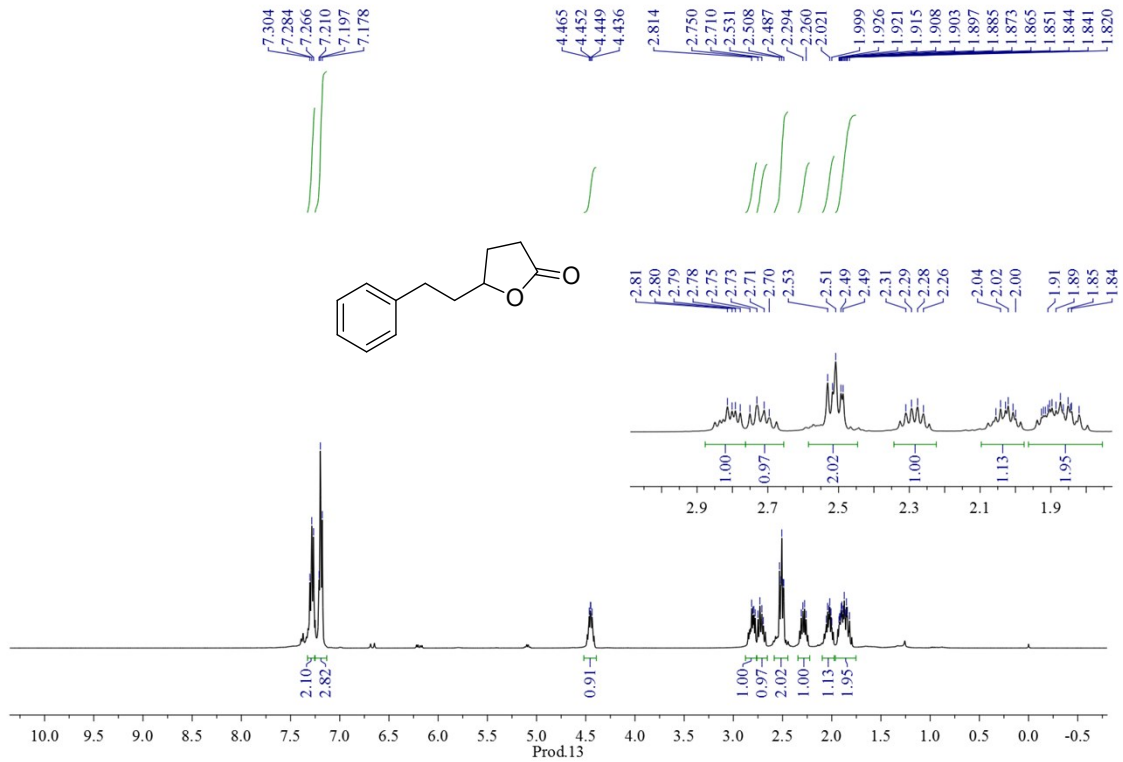

<sup>1</sup>H NMR of **2x**

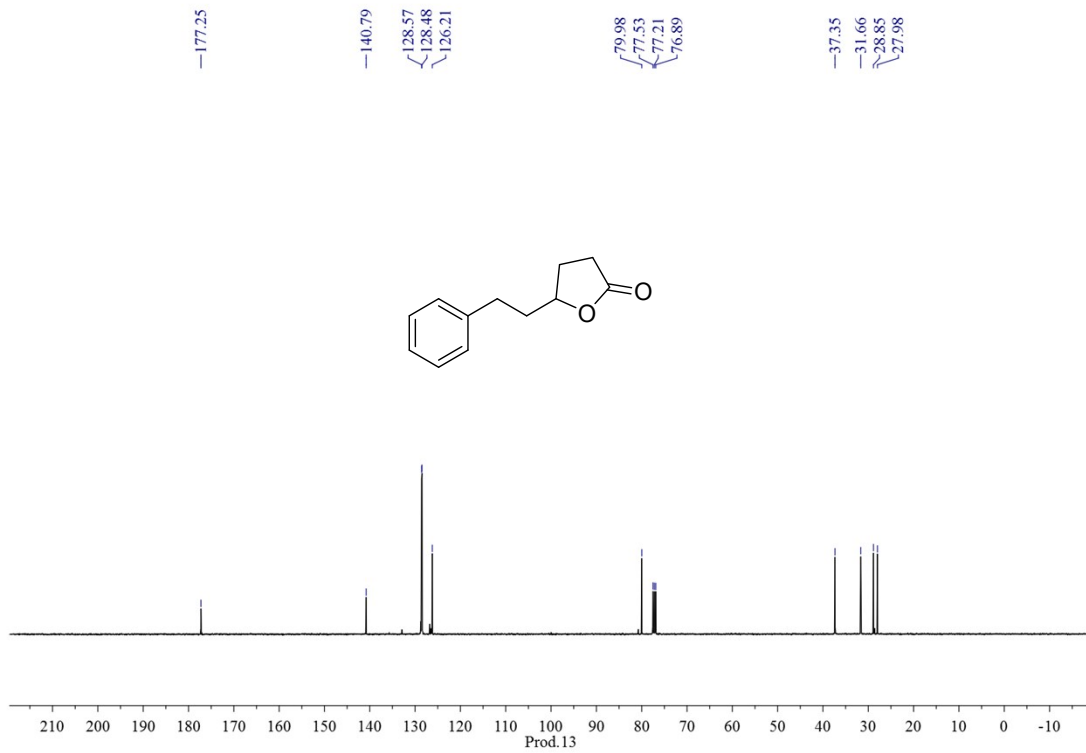

<sup>13</sup>C NMR of **2x**

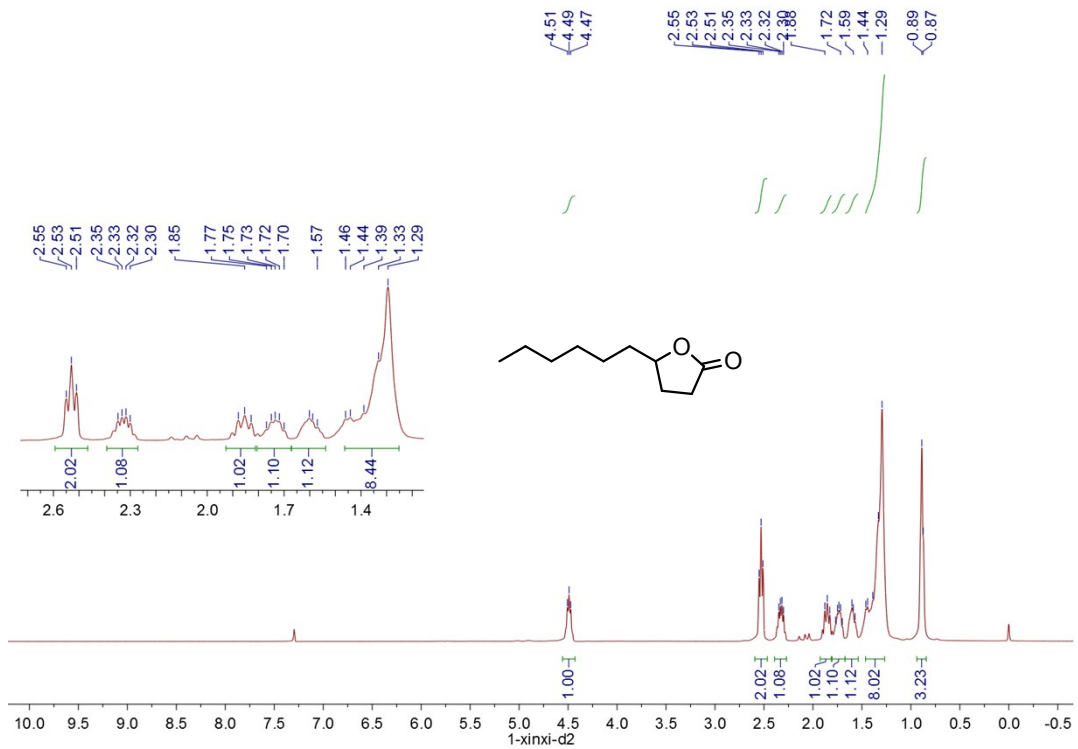

<sup>1</sup>H NMR of 2y

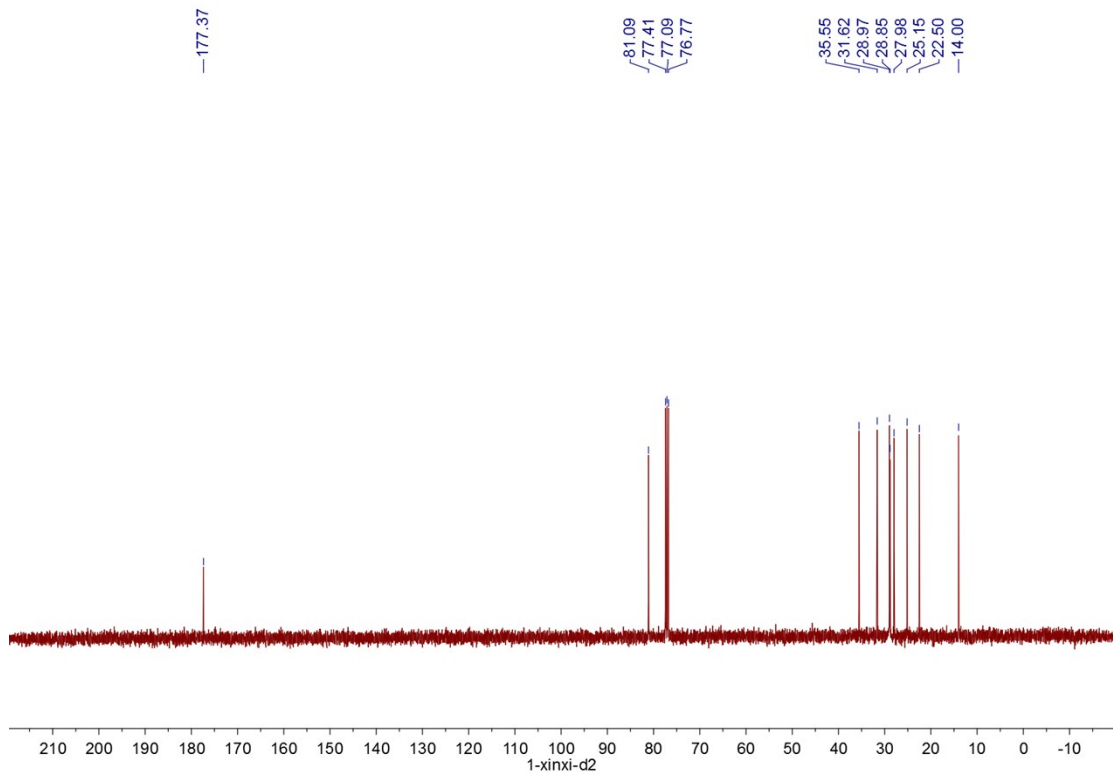

<sup>13</sup>C NMR of 2y

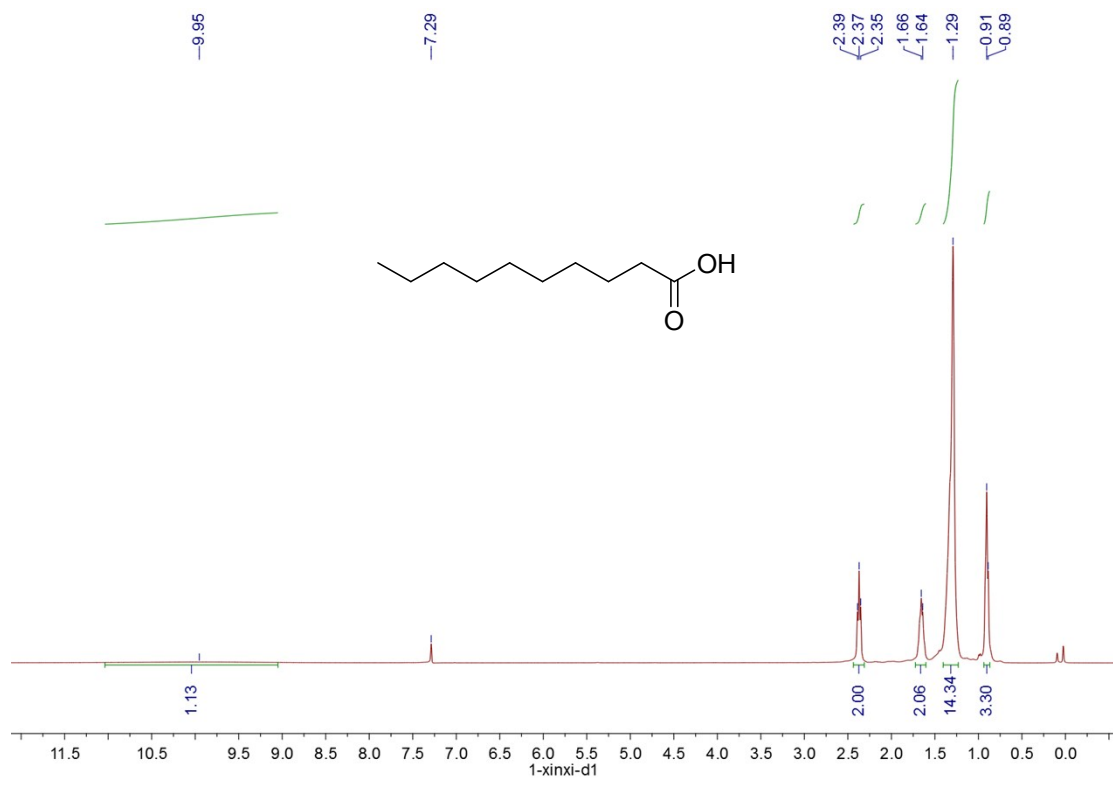

<sup>1</sup>H NMR of Decanoic acid (2y-1)

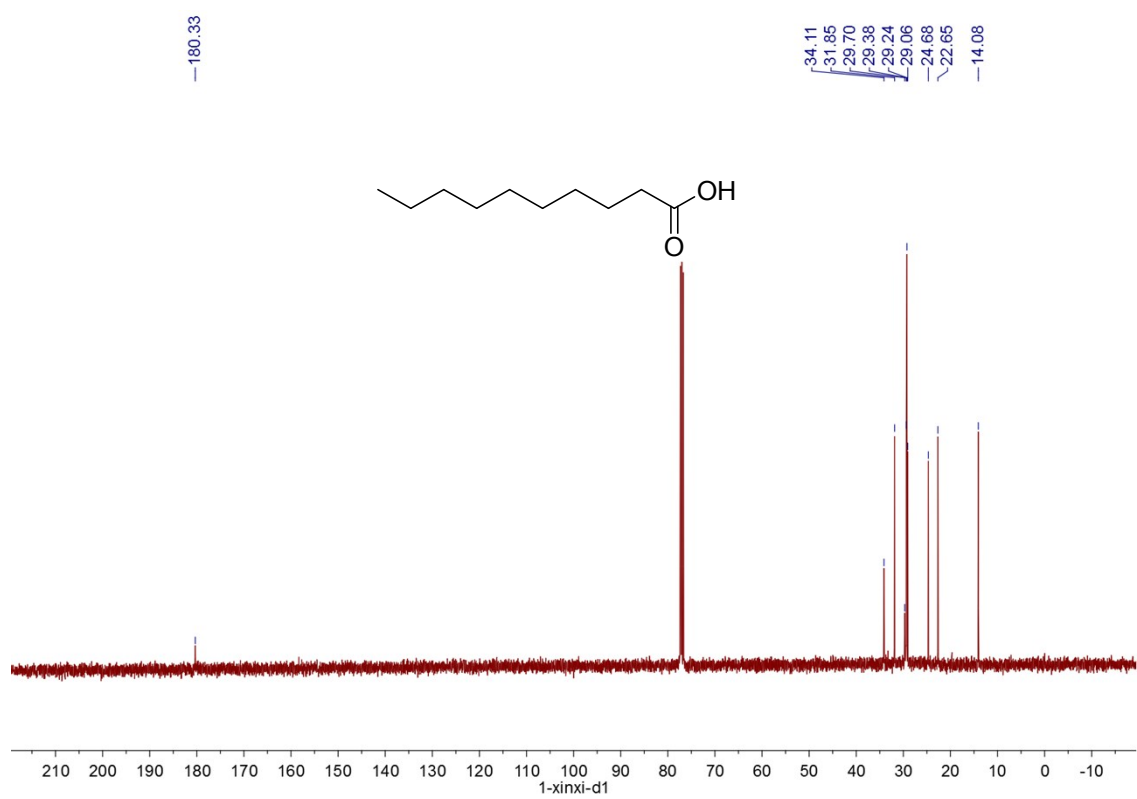

<sup>13</sup>C NMR of Decanoic acid (2y-1)

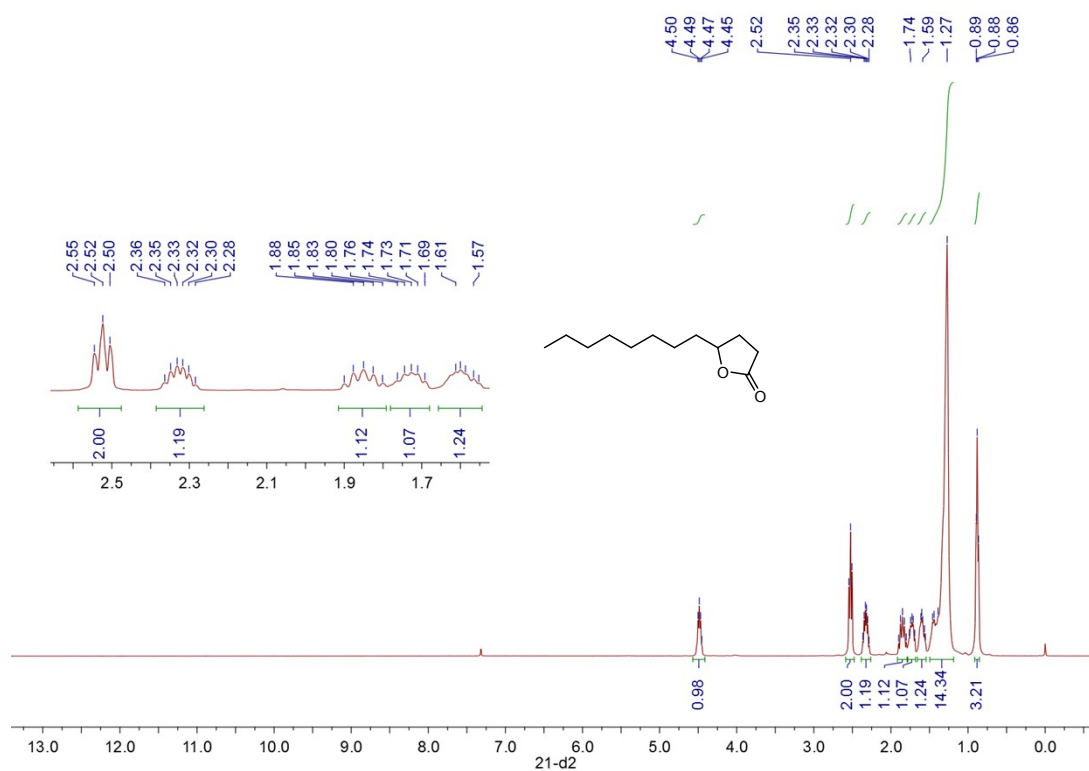

<sup>1</sup>H NMR of **2z**

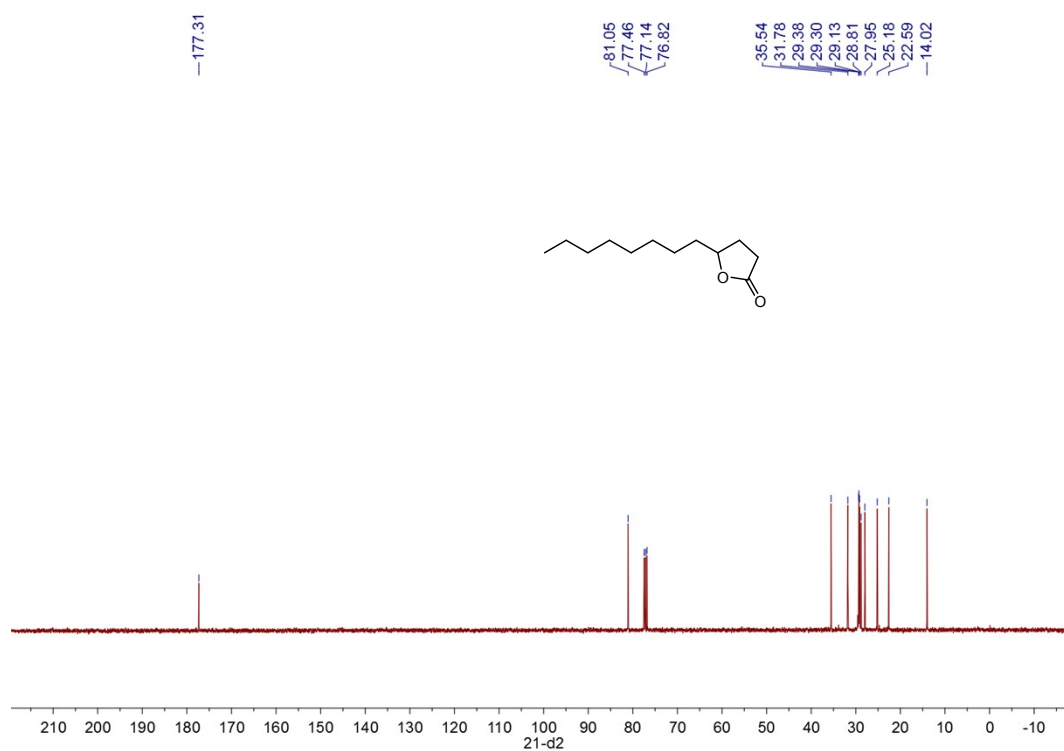

<sup>13</sup>C NMR of **2z**

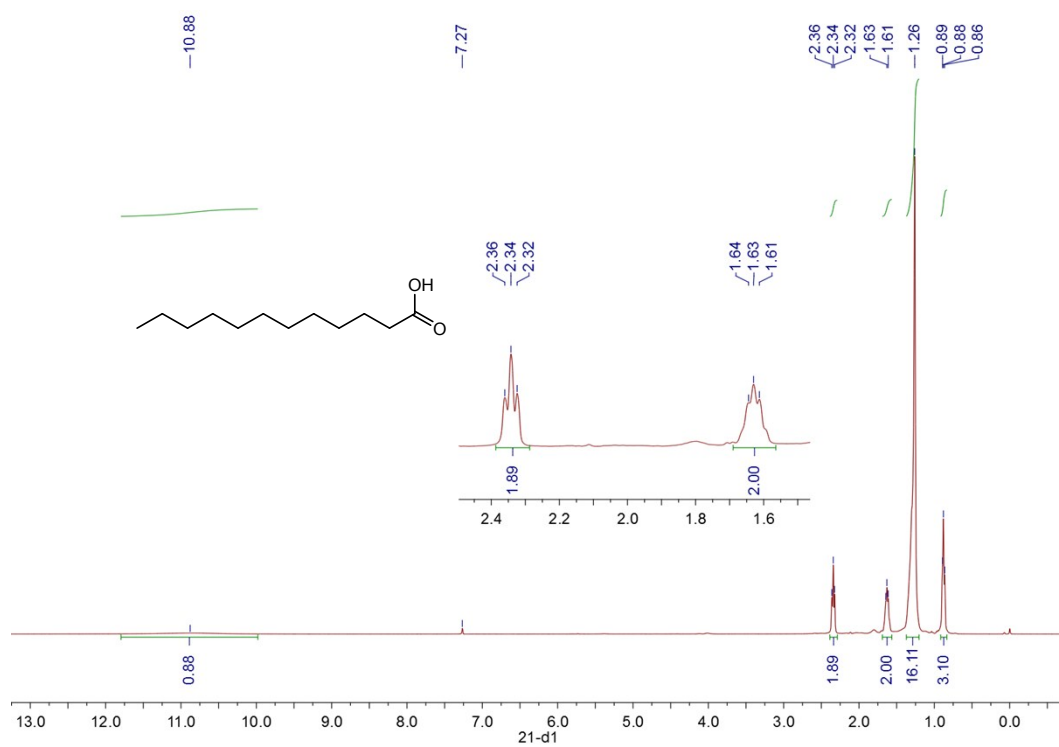

**<sup>1</sup>H NMR of Dodecanoic acid (2z-1)**

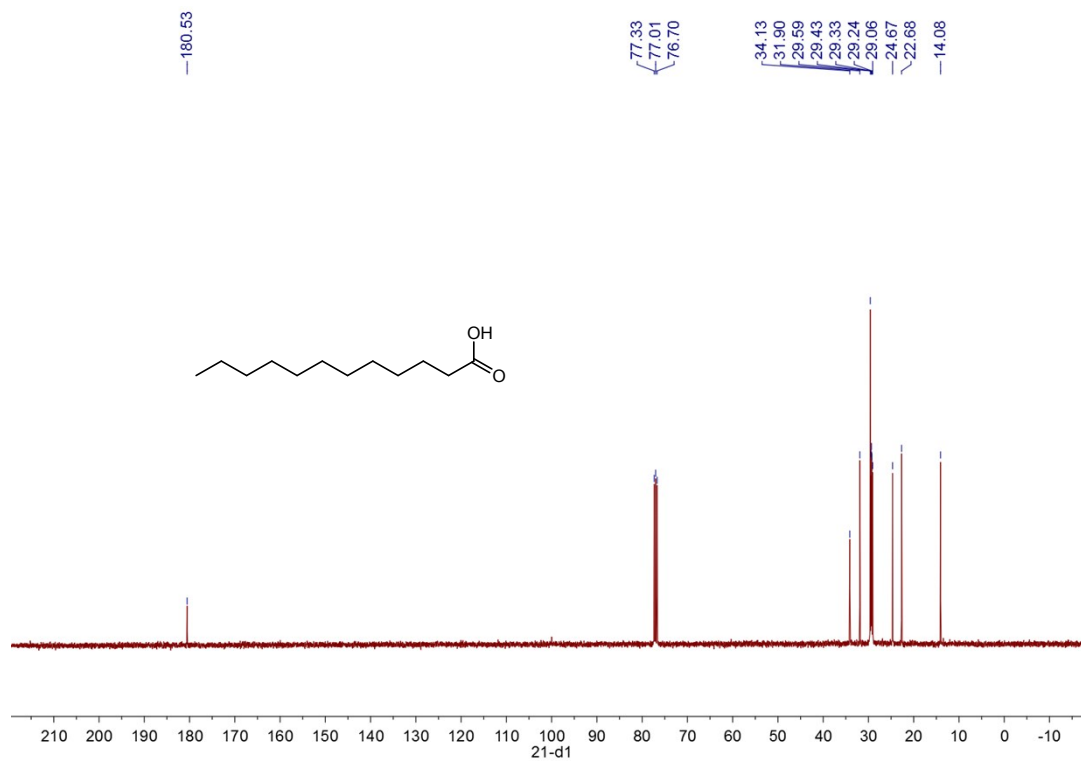

**<sup>13</sup>C NMR of Dodecanoic acid (2z-1)**

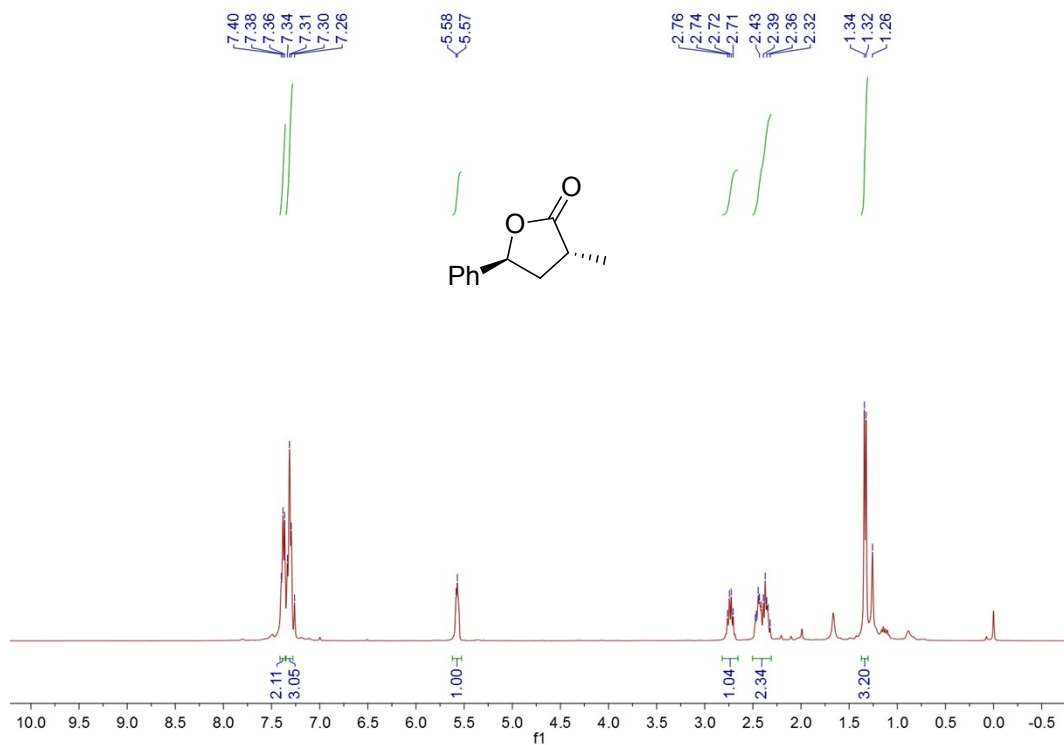

$^1\text{H NMR}$  of **3a-1**

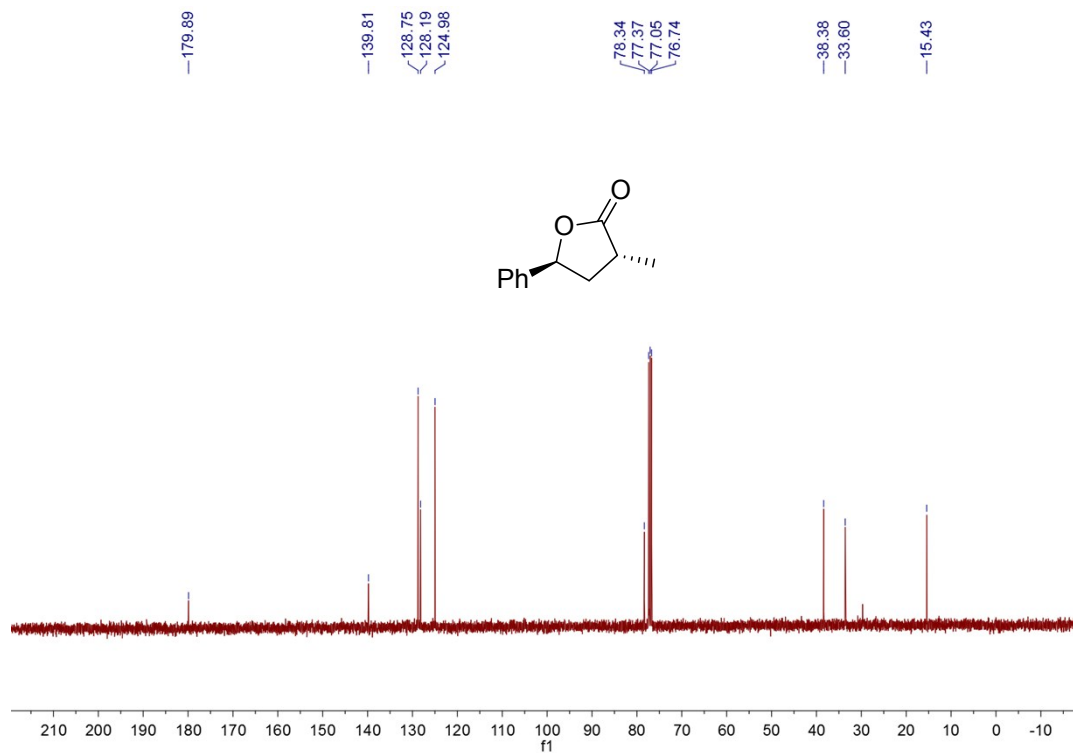

$^{13}\text{C NMR}$  of **3a-1**

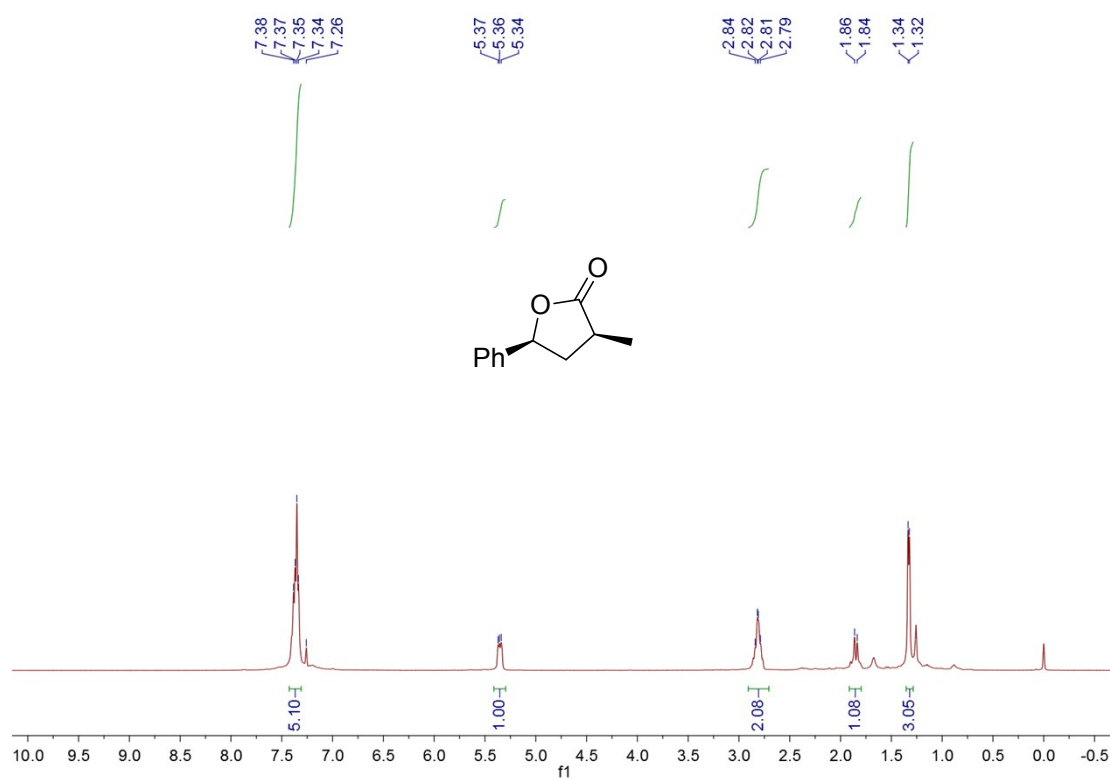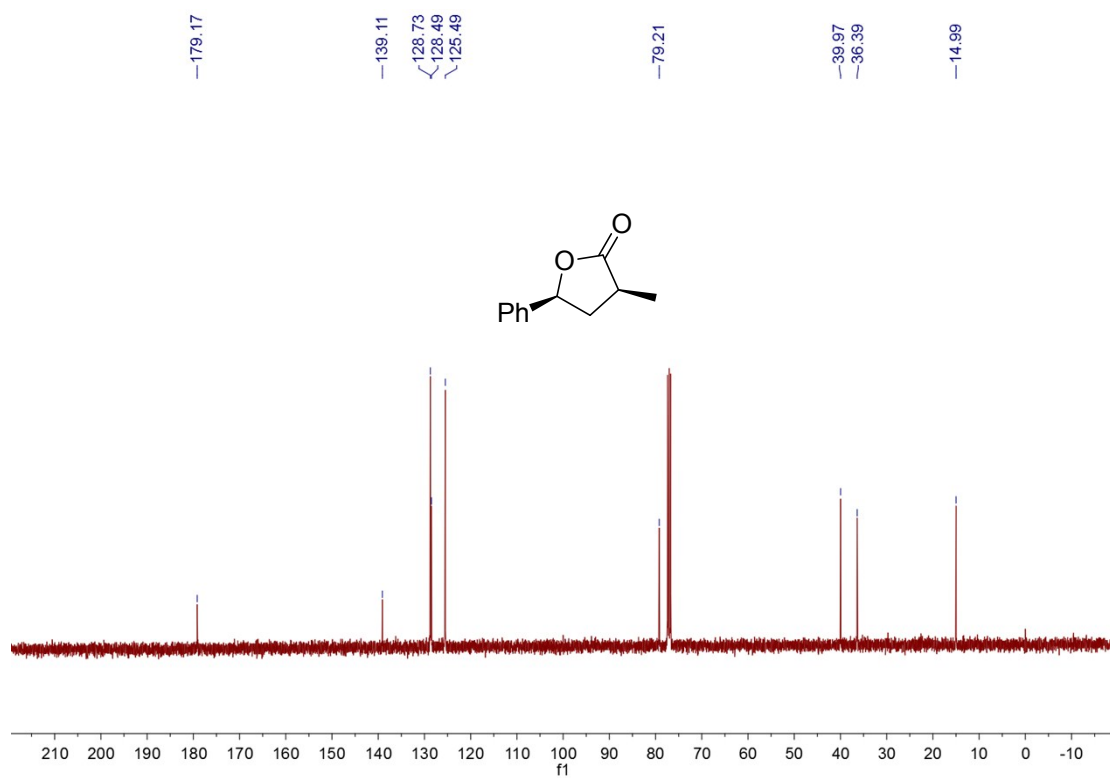



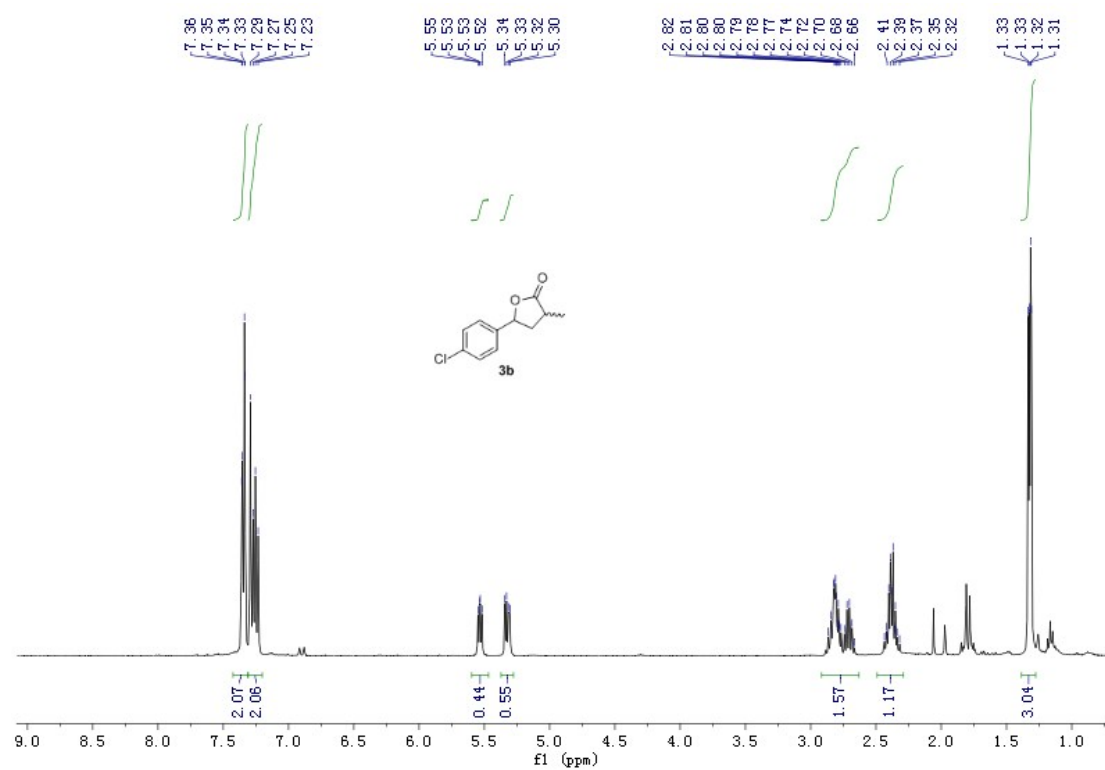

<sup>1</sup>H NMR of **3b**

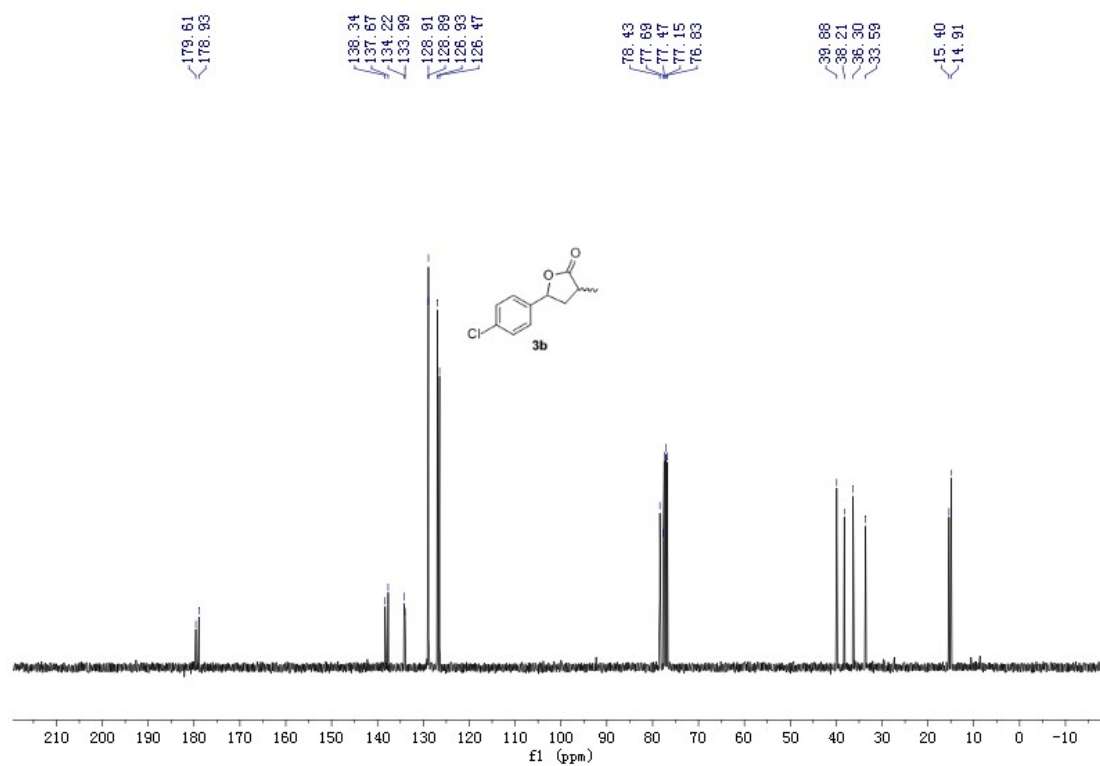

<sup>13</sup>C NMR of **3b**

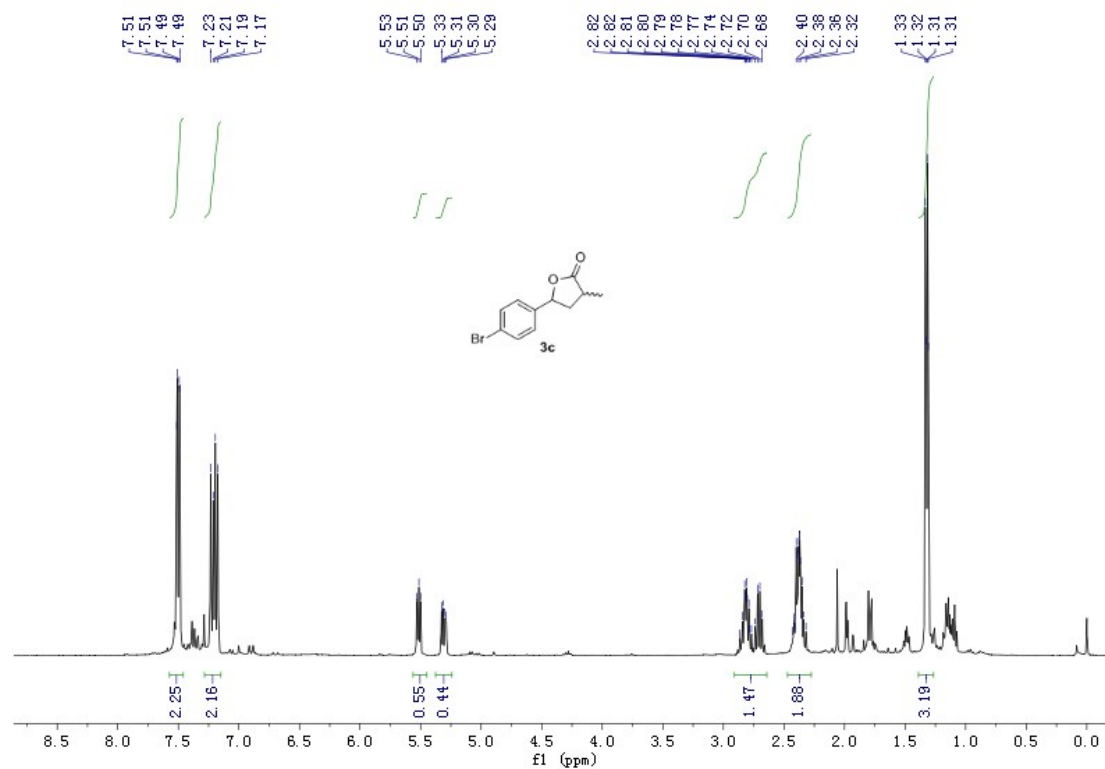

<sup>1</sup>H NMR of 3c

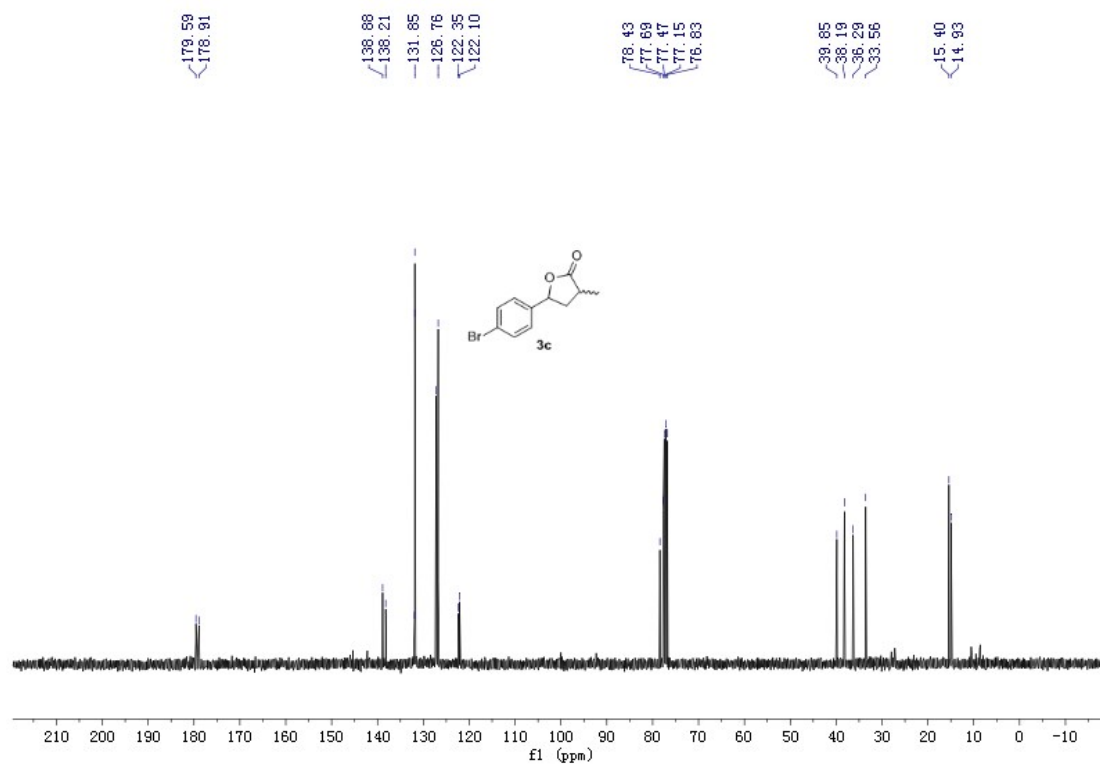

<sup>13</sup>C NMR of 3c
